1           Warming decreases host survival with multiple parasitoids, but  
2                           parasitoid performance also decreases

3   **Mélanie Thierry**<sup>\*1,2</sup>, **Nicholas A. Pardikes**<sup>2</sup>, **Benjamin Rosenbaum**<sup>3,4</sup>, **Miguel G. Ximénez-Embún**<sup>2</sup>, &  
4   **Jan Hrčěk**<sup>1,2</sup>

5   <sup>1</sup> University of South Bohemia, Faculty of Science, Branisovska 31, 37005, Czech Republic

6   <sup>2</sup> Biology Centre of the Czech Academy of Sciences, Institute of Entomology, Branisovska 31, 37005,  
7   Czech Republic

8   <sup>3</sup> Theory in Biodiversity Science, German Centre for Integrative Biodiversity Research (iDiv), Halle-Jena-  
9   Leipzig, Puschstr. 4, 04103 Leipzig, Germany

10   <sup>4</sup> Institute of Biodiversity, Friedrich Schiller University Jena, Dornburger Str. 159, 07743 Jena, Germany

11   \* Corresponding author: [melanie.thierry34@gmail.com](mailto:melanie.thierry34@gmail.com)

12

13   **Running title:** Warming alters multiple predator effects

14 **Abstract.** Current global changes are reshaping ecological communities and modifying environmental  
15 conditions. We need to recognize the combined impact of these biotic and abiotic factors on species  
16 interactions, community dynamics and ecosystem functioning. Specifically, the strength of predator-prey  
17 interactions often depends on the presence of other natural enemies: it weakens with competition and  
18 interference, or strengthens with facilitation. Such effects of multiple predators on prey are likely to be  
19 affected by changes in the abiotic environment, altering top-down control, a key structuring force in both  
20 natural and agricultural ecosystems. Here, we investigated how warming alters the effects of multiple  
21 predators on prey suppression using a dynamic model coupled with empirical laboratory experiments with  
22 *Drosophila*-parasitoid communities. While the effects of multiple parasitoids on host suppression were the  
23 average of the effects of individual parasitoid at ambient temperature, host suppression with multiple  
24 parasitoids was higher than expected under warming. Multiple parasitoid species had equivalent effect to  
25 multiple individuals of a same species. While multiple parasitoids enhanced top-down control under  
26 warming, parasitoid performance generally declined when another parasitoid was present due to  
27 competitive interactions, which could reduce top-down control in the long-term. Our study highlights the  
28 importance of accounting for interactive effects between abiotic and biotic factors to better predict  
29 community dynamics in a rapidly changing world, and better preserve ecosystem functioning and services  
30 such as biological control.

31 **Keywords:** biodiversity-ecosystem functioning, global change, temperature, functional response, host-  
32 parasitoid networks, multiple predator effects

### 33 **Introduction**

34 Ongoing global changes are eroding global biodiversity (Wagner, Grames, Forister, Berenbaum, & Stopak,  
35 2021). Predators are generally more at risk of extinction and loss of biomass than their prey because they  
36 are impacted by these environmental changes both directly and indirectly through the effects on lower  
37 trophic levels (Voigt et al., 2003). The loss of predatory biodiversity could result in a decline in top-down  
38 control, threatening biological control and further eroding biodiversity through cascading effects on lower  
39 trophic levels (Kehoe, Frago, & Sanders, 2020). Yet, little is known about how warming alters the effects  
40 of multiple predators on top-down control.

41 The abiotic context is key for the outcome of species interactions (Davis, Lawton, Shorrocks, &  
42 Jenkinson, 1998; Song, Von Ahn, Rohr, & Saavedra, 2020). Global warming can weaken the strength of  
43 trophic interactions due to changes in metabolic rates (Rall, Vucic-Pestic, Ehnes, Emmerson, & Brose,  
44 2010), shifts in spatial distributions and in seasonal phenology (Parmesan, 2006), lethal effects on predators,  
45 or altered attack rates (Hance, Baaren, Vernon, & Boivin, 2007; Thierry, Hřček, & Lewis, 2019; Uszko,  
46 Diehl, Englund, & Amarasekare, 2017). But warming does also alter the strength of non-trophic interactions  
47 among predators. For instance, warming can induce changes in predator habitat use through phenotypic  
48 plasticity to adjust to the changing environment (Barton & Schmitz, 2009; Schmitz & Barton, 2014), which  
49 could lead to habitat overlap among predator species that were not previously interacting. Warming could  
50 also change predator foraging behavior, changing predator efficiency due to changes in encounter and attack  
51 rates (Uszko et al., 2017). Altered non-trophic interactions among predators would change the effects of  
52 multiple predators on top-down control (Cuthbert, Wasserman, Dalu, & Briski, 2021; Sentis, Gémard,  
53 Jaugeon, & Boukal, 2017), yet to what extent is unclear. Effects of warming on non-trophic interactions  
54 among predators are often overlooked, but essential to accurately forecast ecological consequences of  
55 warming for biological control.

56 The effects of multiple predators on prey suppression are often assumed to be additive, which would be  
57 true if predators have independent effects on prey. Predator density should therefore enhance top-down

58 control because of a higher predatory pressure on the prey. However, direct and indirect interactions among  
59 predators, or change in the prey demographic habitat selection with the presence of multiple predators, may  
60 cause effects to deviate from additivity (Resetarits, Bohenek, & Pintar, 2021; Schmitz, 2007; Sih, England,  
61 & Wooster, 1998). The effects of multiple predators on prey can be synergistic (i.e., the effects are greater  
62 than what would be expected if they were additive) due to niche complementarity or facilitation (i.e., risk  
63 enhancement for the prey). Niche complementarity can be achieved when predators have complementary  
64 phenologies or habitat domains (Schmitz, 2009). In contrary, the effects of multiple predators on prey can  
65 be antagonistic due to intraguild predation, competition, or interference when the degree of overlap between  
66 predator's foraging areas or phenologies is too high (i.e., risk reduction) (Laubmeier, Rebarber, &  
67 Tenhumberg, 2020). All such potential effects are referred to as multiple predator effects (MPEs; Soluk  
68 1993). A meta-analysis from Griffin et al. (2013) revealed an overall positive effect of predator diversity  
69 on top-down control, suggesting a general pattern of niche complementarity (Northfield, Snyder, Ives, &  
70 Snyder, 2010). Contrastingly, a meta-analysis focused on biological control studies (59 projects against  
71 weeds and 108 projects against insect pests) revealed that, in more than half of the studies considered, the  
72 success of biological control efforts was due to a single species (Denoth, Frid, & Myers, 2002). This  
73 observation can be explained by the high specificity of the natural enemies used as biocontrol agents,  
74 resulting in strong competitive interactions among them. Efficiency of a single species versus diverse  
75 predator assemblages for biological control depends on potential for niche differentiation between  
76 predators, and the overall efficiency of each predator on the focal prey species (Pedersen & Mills, 2004).  
77 Functionally diverse predator communities, in term of habitat domain, diet breadth, and hunting strategy,  
78 are essential to preserve to maximize pest control ecosystem services, and should increase pest suppression  
79 above that of the most effective predator species (Greenop, Woodcock, Wilby, Cook, & Pywell, 2018).  
80 Emergent MPEs are particularly important in biological control where introduction of one or several  
81 predator species might result in risk reduction for the prey because of competition among predator instead  
82 of planned risk enhancement (Tylianakis & Romo, 2010).

83 Warming can alter both trophic and non-trophic interactions. Changes in the strength of these  
84 interactions could modify emergent MPEs, either enhancing or decreasing top-down control. Climate  
85 change also disrupts species composition of communities (Parmesan, 2006; Thierry, Pardikes, Lue, Lewis,  
86 & Hrček, 2021), which would shift the outcome of pairwise interactions that are influenced by other species  
87 in the community (Kéfi et al., 2015; Thierry, Pardikes, Ximénez-Embún, Proudhom, & Hrček, 2021;  
88 Wootton, 1997). Changes in species composition of communities are thus also likely to alter MPEs,  
89 affecting biological control. However, interactive effects between warming and community composition  
90 on top-down control remain poorly studied.

91 Here, we used mathematical models in combination with a series of three laboratory experiments on  
92 *Drosophila simulans* and three of its co-occurring larval parasitoids to investigate the effects of warming  
93 on multiple predator effects for top-down control. Host-parasitoid interactions are a particular type of  
94 predator-prey interaction in which parasitoid larvae feed and develop inside or on an arthropod host, while  
95 adults are free living (Godfray, 2013). When parasitized, three outcomes are possible: the parasitoid  
96 successfully develops, the host successfully eliminates its parasitoid through immune response (i.e.,  
97 encapsulation and melanization) and survives (Yves Carton, Poirié, & Nappi, 2008), or both parties die.  
98 When multiple parasitoids are present, they can compete extrinsically as adults for space and oviposition  
99 (i.e., interference), and intrinsically within a host (reviewed in Harvey et al. 2013). Intrinsic competition is  
100 the result of a super- and/or multiparasitism event when two parasitoids - conspecifics or heterospecifics  
101 respectively - parasitize the same host individual. In solitary parasitoids, such as the species used in the  
102 present study, only one individual completes its development in each host, suppressing the other(s)  
103 physically or physiologically. Still, both parasitoid species can be observed as eggs or larvae inside the host  
104 by dissecting the host larva. Parasitoids thus represent an excellent system to study how warming directly  
105 changes the effects of multiple predators on top-down control because the outcome of the interactions is  
106 directly observed by rearing the host, and intrinsic competitive interactions between parasitoids can be  
107 observed by dissecting the host larva. In this study, we empirically measured trophic interaction strength

108 across temperatures and parasitoid assemblages. We deduced emergent effects of multiple parasitoids on  
109 host suppression by comparing empirical data with estimates in which multiple parasitoids would not  
110 interact (i.e., would have additive effect) using a mathematical model for multiple co-occurring parasitoids  
111 with a functional response approach (Mccoy, Stier, & Osenberg, 2012; Sentis & Boukal, 2018). With this  
112 framework, we addressed three specific questions: (1) Do multiple parasitoids have additive, synergistic,  
113 or antagonistic effects on host suppression? (2) To what extent does temperature modify the outcomes of  
114 MPEs? (3) Are changes in host immune response or competitive interaction strength causing emergent  
115 MPEs? Our results demonstrate the prevalent role of temperature for non-trophic interactions among  
116 parasitoids, with cascading effects on host suppression.

## 117 **Materials and Methods**

### 118 *Biological system*

119 Cultures of *Drosophila simulans* and their associated parasitoids collected from two tropical rainforest  
120 locations in North Queensland Australia: Paluma (S18° 59.031' E146° 14.096') and Kirrama Range (S18°  
121 12.134' E145° 53.102'; both <100 m above sea level; Jeffs et al., 2021) were used for the experiments. *D.*  
122 *simulans* and parasitoid cultures were established between 2017 and 2018, identified using both  
123 morphology and DNA barcoding, and shipped to the Czech Republic under permit no. PWS2016-AU-  
124 002018 from Australian Government, Department of the Environment. All cultures were maintained at  
125 23°C on a 12:12 hour light and dark cycle at Biology Centre, Czech Academy of Sciences. The three larval  
126 parasitoid species *Asobara sp.* (Braconidae: Alysiinae; strain KHB, reference voucher no.  
127 USNMENT01557097, reference sequence BOLD process ID: DROP043-21), *Leptopilina sp.* (Figitidae:  
128 Eucolinae; strain 111F, reference voucher no. USNMENT01557117, reference sequence BOLD process  
129 ID: DROP053-21), and *Ganaspis sp.* (Figitidae: Eucolinae; strain 84BC, reference voucher no.  
130 USNMENT01557102 and USNMENT01557297, reference sequence BOLD process ID: DROP164-21)  
131 were used (for more details on the parasitoid strains see Lue et al. 2021). *Drosophila simulans* isofemale  
132 lines were kept on standard *Drosophila* medium (corn flour, yeast, sugar, agar and methyl-4-

133 hydroxybenzoate) for approximately 45 to 70 non-overlapping generations before the experiments. To  
134 revive genetic variation, five host lines were combined to establish two population cages of mass-bred lines  
135 prior the start of the experiments. Single parasitoid isofemale lines were used and maintained for  
136 approximately 25 to 40 non-overlapping generations prior to the start of the experiment by providing them  
137 every week with two-days-old larvae of a different *Drosophila* species – *Drosophila melanogaster*.

### 138 *Experiments*

139 To investigate the effects of warming on the strength of trophic and non-trophic interactions, we used a  
140 functional response approach following the framework of McCoy et al. (2012). We first obtained the  
141 parameters of each parasitoid functional response at ambient and warmed temperatures with single-  
142 parasitoid treatments (Experiment 1). Then, we used these functional response parameter estimates to  
143 predict trophic interaction strength for each temperature and parasitoid combination with the null hypothesis  
144 that parasitoids were not interacting, and thus had additive effects on host suppression. In Experiment 2 we  
145 empirically measured the effects of temperature and parasitoid combinations on trophic interaction strength  
146 and compared the predicted and observed values to identify emergent effects of multiple parasitoids on host  
147 suppression and their dependence on the temperature regime. The two first blocks of Experiment 1 and  
148 entire Experiment 2 were performed in parallel, and controls and single-parasitoid treatments were common  
149 to both experiments. In Experiment 3, we investigated the mechanisms of multiple parasitoid effects  
150 (intrinsic competition, rate of encapsulation) by dissecting hosts rather than rearing them. This allowed us  
151 to measure rates of super- and multiparasitism and encapsulation depending on the temperature regime and  
152 parasitoid combinations.

153 A total of 22,920 *D. simulans* eggs were collected: 13,120 for experiment 1, 4,800 for experiment 2 [of  
154 which 12,990 (73%) successfully emerged as adults (8,409 hosts and 4,581 parasitoids)], and 5,000 for  
155 experiment 3 from which 1,000 larvae were dissected.

156 *Experiment 1: Single-parasitoid experiment*

157 Eggs of *D. simulans* were placed in a single glass vial with 10mL of *Drosophila* media at six different  
158 densities (5, 10, 15, 25, 50 or 100 eggs per 10mL of food media in vial; Figure 1a). To collect *D. simulans*  
159 eggs, an egg-washing protocol was adapted from Nouhaud et al. (2018). The day before the egg-washing  
160 protocol was conducted, two egg-laying mediums (petri dishes with agar gel topped with yeast paste) were  
161 introduced in each population cage for flies to laying eggs overnight. Eggs were transferred in the  
162 experimental vials. Half of the vials were placed at ambient temperature ( $22.7^{\circ}\text{C} \pm 0.4$ ), and the other half  
163 at warmed temperature ( $27.4^{\circ}\text{C} \pm 0.5$  - projected change in global mean surface temperature for the late  
164 21<sup>st</sup> century is  $3.7^{\circ}\text{C}$  for the IPCC RCP8.5 baseline scenario; Pachauri et al., 2014).

165 After 48 hours, one single naïve mated three to five-days-old female parasitoid was placed in each vial  
166 with *D. simulans* larvae. Twenty-four hours later, parasitoids were removed. This was repeated for all three  
167 parasitoid species, temperatures, and host densities. Controls without parasitoids were run at the same time  
168 to obtain the baseline for host survival without parasitism. Vials were checked daily for emergences until the  
169 last emergence (up to 41 days for the species with the longest developmental time). We waited five  
170 consecutive days without any emergences to stop collecting, thus avoiding collecting the second generation.  
171 All emergences were collected, identified, sexed, and stored in 95% ethanol. Each treatment was replicated  
172 eight times across eight experimental blocks.

173 *Experiment 2: Multiple parasitoids experiment*

174 To investigate the effect of warming on MPEs, we manipulated parasitoid assemblages and temperature in  
175 a fully factorial design (Figure 1b and c). We followed the same protocol described above for Experiment  
176 1, using 50 *D. simulans* eggs per vial with two female parasitoids either from the same (Figure 1b) or  
177 different species (Figure 1c). Each treatment was replicated eight times across two blocks.

178 *Experiment 3: Mechanisms of MPEs*

179 In a follow up experiment, we conducted a subset of the treatments described for Experiments 1 and 2 with  
180 *Asobara sp.* and *Gnaspis sp.* We used 50 *D. simulans* eggs per 10 mL of food media in vial under ambient



181 and warming temperatures and introduced one parasitoid, two parasitoids conspecific or the two parasitoids  
182 heterospecific, resulting in five different parasitoid assemblages. Instead of rearing the insects to adults, we  
183 dissected ten 3<sup>rd</sup> instar larvae or pupae per vial (Figure 1e). Each host larva was individually transferred  
184 into a glass petri dish containing PBS and dissected under stereomicroscope. We recorded the number of  
185 parasitoid larvae and eggs of each species to assess super- and multiparasitism events, and, when possible,  
186 the number and identity of encapsulated parasitoids. Pictures of the eggs, larvae, and encapsulated  
187 parasitoids for each species observed during the experiment are presented in Supplemental Material S1.  
188 Each treatment was replicated ten times across two blocks. At warmed temperature, six replicates were  
189 dissected two days after infection (early dissection time) and four three days after infection (late dissection  
190 time), and at ambient temperature, four replicates were dissected three days after infection (early dissection  
191 time) and six four days after infection (late dissection time). Different times for dissection were chosen for  
192 each temperature to standardize parasitoid developmental stage, while still being able to identify all the  
193 parasitoids that have parasitized the host. At the early dissection time, *Asobara sp.* were already at the larval  
194 stage, whereas *Ganaspis sp.* were still eggs. At the late dissection time, *Ganaspis* larvae were also observed.

#### 195 *Data analysis and modelling*

##### 196 *Experiment 1: Single-parasitoid experiment*

197 We combined numerical simulations of host density dynamics, accounting for host depletion (Rosenbaum  
198 & Rall, 2018):

$$199 \quad \frac{dH}{dt} = -F(H)P,$$

200 with Bayesian parameter estimation using the *rstan* package (e.g. Sohlström et al. 2021).  $P = 1$  is the  
201 parasitoid density, and  $F(H)$  denotes the host density-dependent functional response. In the model fitting,  
202 MCMC was used to sample from the functional response's model parameters' posterior probability  
203 distribution  $p(\theta|H_{\text{att}})$  given the observations  $H_{\text{att}}$ , based on the likelihood function  $p(H_{\text{att}}|\theta)$  and prior  
204 distributions  $p(\theta)$ .  $H_{\text{att}}$  is the number of *D. simulans* attacked (the difference between adult hosts emerging

205 from the controls without parasitoids and from the experiment). In each iteration, numerical solutions of  
206 the equation were computed with the built-in *Runge-Kutta* ODE solver, to predict densities  $\hat{H}_1$  after 1 day  
207 for each given initial host density,  $H_0$ . The likelihood was evaluated assuming a binomial distribution for  
208 observed numbers of attacked hosts  $H_{att}$  with  $n = H_0$  trials and  $p = \frac{H_0 - \hat{H}_1}{H_0}$  success probability. Vague priors  
209 were used for all model parameters.

210 We fitted three different functional response models (Type II, Type III and generalized Type III), and  
211 retained the Type II functional response (Holling, 1959) after model comparison (see Supplement Material  
212 S2). The equation for the instantaneous attack rate of a parasitoid is as follows:

$$213 \quad F(H) = \frac{aH}{1 + ahH}$$

214 where  $a$  is the attack rate, and  $h$  is the handling time. Type II functional responses are thought to  
215 characterize the attack rate of many types of predators and parasitoids (Fernández-Arhex & Corley, 2003).  
216 Parameter estimates and the functional responses for each species at each temperature are presented in  
217 Supplement Material S2 (Table S1 and Figure S2).

#### 218 *Experiment 2: Multiple parasitoids experiment*

219 Host-parasitoid interaction strength was defined with the combination of Degree of Infestation (DI; i.e.,  
220 host suppression) and Successful Parasitism rate (SP; i.e., parasitoid performance). Observed degree of  
221 infestation ( $DI_{obs}$ ) and Successful parasitism rate ( $SP$ ) were measured as:

$$222 \quad DI_{obs} = 1 - \frac{H}{H_C} ; SP = \frac{P}{H_C - H}$$

223 where  $H$  is the number of adult hosts emerging from the experiment vial,  $H_C$  the mean number of adult  
224 hosts emerging from the controls without parasitoids, and  $P$  the number of parasitoid adults emerging from  
225 the experimental vial (Boulétreau & Wajnberg, 1986; Y. Carton & Kitano, 1981).  $DI_{obs}$  was set to zero if  
226 the number of hosts emerging from the treatment was greater than the controls. If no parasitoid emerged or

227 if the number of hosts attacked was estimated to be zero,  $SP$  was set to zero. If the number of parasitoids  
228 that emerged was greater than to the estimated number of hosts attacked,  $SP$  was set to one. For treatments  
229 with single parasitoid species, we assumed that each of the two parasitoid individuals were attacking the  
230 hosts equally, therefore the number of parasitoid adults emerging was divided by two to calculate individual  
231 successful parasitism rate.

232 Data were analyzed with generalized linear models (GLMs). Model assumptions were verified with the  
233 *DHARMA* package (Hartig, 2019). To correct for overdispersion of the residuals and zero inflation, data  
234 were modeled using zero-inflation models with a beta binomial error distribution and a logit function using  
235 the *glmmTMB* function from the *TMB* package (Lüdecke, Makowski, & Waggoner, 2019). Two categories  
236 of predictor variables were used in separate models with temperature treatment (two levels: ambient and  
237 warming): (i) parasitoid treatment (three levels; single parasitoid, two parasitoids conspecific, and two  
238 parasitoids heterospecific), and (ii) parasitoid species assemblage (nine levels). For DI, two-way  
239 interactions between temperature and either parasitoid treatment or parasitoid assemblage were always kept  
240 in our models for better comparison with predicted DI values (see section below). For SP, these two-way  
241 interactions were tested and kept in our models if judged to be significant based on backward model  
242 selection using Likelihood-ratio tests. Significance of the effects was tested using Wald type III analysis of  
243 deviance with Likelihood-ratio tests. Factor levels were compared using Tukey's HSD *post hoc*  
244 comparisons of all means, and the *emmeans* package (Lenth, 2018). Results for developmental rate are  
245 presented in Supplement Material S3 (Figure S3).

#### 246 *Estimation of multiple parasitoid effects*

247 To predict the degree of infestation if parasitoids have independent effects on host suppression, we used  
248 the method develop by McCoy et al. (2012) which takes into account host depletion. This method uses the  
249 functional responses obtained from Experiment 1 in a population-dynamic model to predict how host  
250 density changes in time as a function of initial density and parasitoid combination for each temperature.

251 We thus calculated the estimated Degree of Infestation ( $DI_0$ ) by integrating the aggregate attack rates over  
252 the duration of the experiment as host density declines. We first solved the equation

$$253 \quad \frac{dH}{dt} = - \sum_{i=1}^n \frac{a_i H_t P_i}{1 + a_i h_i H_t}$$

254 similar to the equation described for Experiment 1, but adapted to  $n$  parasitoids. Then we calculated the  
255 estimated Degree of Infestation as

$$256 \quad DI_0 = 1 - \frac{H_T}{H_0}$$

257 where  $H_0$  is the initial host density, and  $H_T$  is the estimated host population at the end of the experiment  
258 (time  $T = 1$  day). This method allows a good estimate of  $DI_0$  for the null hypothesis that predators do not  
259 interact (Sentis & Boukal, 2018). The lower and upper confidence intervals (CI) around the predicted values  
260 were estimated with a global sensitivity analysis based on the functional response parameters estimates to  
261 generate 100 random parameter sets using a Latin hypercube sampling algorithm (Soetaert & Petzoldt,  
262 2010). The expected degree of infestation was calculated for each parameter set using the *sensRange*  
263 function in the R package *FME*. The 2.5% and the 97.5% quantiles of the values obtained from these  
264 simulations were used as 95% CIs around the predictions.

265 Predictions from the population dynamic model were then compared with the observed values ( $DI_{obs}$ ).  
266 Estimated DI values greater than observed DI translate to risk reduction while estimates that were lower  
267 than observed DI reflects risk enhancement for the host with multiple parasitoids. We calculated the  
268 difference between  $DI_{obs}$  and mean  $DI_0$  for each treatment, and investigated the effects of temperature  
269 (ambient versus warmed), parasitoid diversity (one or two species), and their interaction if significant, using  
270 an analysis of variance (ANOVA) with the *aov* function. We statistically compared the observed and  
271 estimated DI for each temperature regime using a quasibinomial GLM with  $DI_0$  as an offset (i.e., predictor  
272 variable) following Sentis et al. (2017). A positive or negative significant intercept indicates that  $DI_0$  values  
273 underestimate or overestimate  $DI_{obs}$ , respectively.

274 *Experiment 3: MPEs mechanisms*

275 The frequency of super- and multiparasitism event was calculated out of the larvae parasitized per vial (total  
276 of 1,000 larvae dissected across 100 vials, out of which 868 were parasitized: presence of either one or both  
277 parasitoid species and/or trace of melanization). The frequency of encapsulated parasitoids was calculated  
278 out of the total of parasitoids per larva. Effects of temperature and parasitoid assemblages on these  
279 frequencies were analyzed with generalized linear mixed models (GLMMs). To correct for overdispersion  
280 of the residuals, data were modeled using zero-inflation models with a beta binomial error distribution and  
281 a logit function with the *glmmTMB* function. The two-way interaction between temperature and parasitoid  
282 assemblage was tested and kept in our models if judged to be significant based on backward model selection  
283 using Likelihood-ratio tests. We included dissection time (two levels: early and late) as a random factor in  
284 our models to account for potential effects of sampling design on our results. Significance of the effects  
285 was tested using Wald type III analysis of deviance with Likelihood-ratio tests. Factor levels were compared  
286 using Tukey's HSD *post hoc* comparisons of all means. All analyses were performed using R 4.0.2 (Team,  
287 2017).

288 **Results**

289 *Effects of multiple parasitoids on host suppression under warming*

290 The degree of infestation observed in the experiment varied from the model estimations (Figure 2).  
291 Temperature significantly affected these differences ( $F_{1,93} = 9.89$ ,  $P = 0.002$ ), but not parasitoid diversity  
292 ( $F_{1,93} = 0.08$ ,  $P = 0.772$ ), implying that parasitoid density rather than their diversity is important for host  
293 suppression. The comparison of the estimated and observed DI revealed that, in most cases, there were no  
294 significant difference between predicted and observed DI at ambient temperature, implying neutral effects  
295 with multiple parasitoids (when looking at the intercept of the quasibinomial GLM with  $DI_0$  as an offset;  
296 value  $\pm$  SE:  $0.18 \pm 0.27$ , t value = 0.692, df = 942,  $P = 0.493$ ), whereas under warming the predicted  $DI_0$   
297 significantly underestimated the observed  $DI_{ob}$ , implying risk enhancement for the host (value  $\pm$  SE:  $0.44$   
298  $\pm 0.20$ , t value = 2.139, df = 798,  $P = 0.038$ ; Figure 2).

299 *Effects of warming and parasitoid assemblages on the observed degree of infestation*

300 Contrary to the emergent effects of multiple parasitoids on host suppression, the observed degree of  
301 infestation  $DI_{obs}$  was not significantly affected by temperature ( $\chi^2_{(1)} = 1.17$ ,  $P = 0.279$ ), or parasitoid  
302 treatment (single, two conspecific or two heterospecific parasitoid assemblages:  $\chi^2_{(2)} = 4.34$ ,  $P = 0.114$ ) due  
303 to species-specific effects. DI only varied with parasitoid species assemblages ( $\chi^2_{(8)} = 258.92$ ,  $P < 0.0001$ ).  
304 Infestation rates were the highest in assemblages with *Ganaspis sp.*, either alone, with a conspecific, or  
305 another parasitoid species (Figure S4). The interaction between temperature and parasitoid assemblages  
306 had no significant effect on  $DI_{obs}$  ( $\chi^2_{(1)} = 3.42$ ,  $P = 0.166$ ), despite some observed variation (Figure S4).

307 *Effect of warming and parasitoid assemblages on parasitoid performance*

308 Despite having no effect on DI, parasitoid treatment (single, two conspecific or two heterospecific  
309 parasitoid assemblages) significantly affected successful parasitism rate, and the effect varied between  
310 parasitoid species (two-way interaction:  $\chi^2_{(4)} = 16.88$ ,  $P = 0.002$ ; Table 1). SP of *Ganaspis sp.* decreased  
311 by 95.7% (95% CI: 93.6 - 97.8%) with the presence of a parasitoid conspecific [*Post hoc* Odds Ratio (OR)  
312 = 0.043,  $P < 0.0001$ ], and by 83.4% (CI: 75.4 - 91.3%) with the presence of a parasitoid heterospecific  
313 compared to when alone (OR = 0.166,  $P = 0.0007$ ). However, it increased by 287.6% (CI: 178.8 - 396.4%)  
314 when the parasitoid competitor was from another species compared to a conspecific (OR = 3.876,  $P <$   
315 0.0001). SP of *Asobara sp.* decreased by 55.2% (CI: 41.5 - 69.7%) when a parasitoid conspecific was  
316 present compared to when alone (OR = 0.448,  $P = 0.036$ ), but was not significantly affected by the presence  
317 of a parasitoid heterospecific (OR = 0.712,  $P = 0.484$ ). There were no significant effects of parasitoid  
318 treatments for SP of *Leptopilina sp.* Effects of parasitoid assemblages on SP also varied between parasitoid  
319 species and are presented in Supplementary Material S5 (Table S2 and Figure S5).

320 Effects of temperature on SP also depended on the species (two-way interaction:  $\chi^2_{(2)} = 7.31$ ,  $P = 0.026$ ).  
321 Only *Ganaspis sp.* was significantly affected by temperature, and its SP decreased by 58.8% (CI: 69.8 -  
322 47.8%) with warming (OR = 0.412,  $\chi^2_{(1)} = 10.17$ ,  $P = 0.001$ ). However, all species developed faster under  
323 warming (Figure S3).

324 *Mechanisms of MPEs*

325 The frequency of either super- or multiparasitism events, reflecting strength of intrinsic competition among  
326 parasitoids, was significantly affected by parasitoid assemblages ( $\chi^2_{(4)} = 572.40$ ,  $P < 0.0001$ ), temperature  
327 ( $\chi^2_{(1)} = 4.49$ ,  $P = 0.034$ ), and the interaction between parasitoid assemblages and temperature  $\chi^2_{(4)} = 36.04$ ,  
328  $P < 0.0001$ ; Figure 3).

329 Superparasitism rate increased by 239% (CI: 230-308%) when *Ganaspis sp.* was with a conspecific (OR =  
330 3.69,  $P < 0.0001$ ), and by 581% (CI: 411-751%) when *Asobara sp.* was with a conspecific (OR = 6.81,  $P <$   
331 0.0001) compared to when they were alone, but without significant differences between temperature  
332 treatments. *Asobara sp.* almost never laid more than one egg per host when alone (only two occurrences  
333 with more than one egg out of the 200 larvae dissected for this treatment). In the parasitoids heterospecific  
334 treatments, warming significantly increased frequency of super- and multiparasitism events by 173% (CI:  
335 130-216%; OR = 2.73,  $P < 0.0001$ ). However, we were not able to identify the winner of the competitive  
336 interaction as several parasitoid larvae were often still alive at the time of the dissection.

337 52.4% of the parasitized larvae ( $n = 868$ ) had evidence of melanization (traces, melanized egg, and/or  
338 melanized larvae), signaling a host immune response. The frequency of encapsulated parasitoids was  
339 significantly affected by parasitoid assemblages ( $\chi^2_{(4)} = 23.89$ ,  $P < 0.0001$ ), and the interaction between  
340 temperature and parasitoid assemblages ( $\chi^2_{(4)} = 11.42$ ,  $P = 0.0223$ ), but only because of the difference  
341 between *Asobara sp.* and *Ganaspis sp.*, not because of parasitoid treatments (single, conspecifics, and  
342 heterospecifics; Figure S6). *Asobara sp.* escaped encapsulation due to its fast development time (Figure  
343 S3). Indeed, when larvae were parasitized by *Asobara sp.*, most traces of melanization were observed on  
344 the empty eggshell, with the parasitoid larva still alive. Moreover, observations through dissections did not  
345 inform us on the outcome of the interactions. Indeed, when larvae were parasitized by *Ganaspis sp.*, some  
346 eggs were only partially encapsulated, and parasitoid larvae were still able to hatch from these.

347 **Discussion**

348 The key result from our study is the synergistic effects of multiple predators for top-down control at elevated  
349 temperature across predator assemblages. Preventing further predator population decline is therefore crucial  
350 for top-down control of arthropods. However, parasitoid performance often decreased when multiple  
351 parasitoids were present due to a strong intrinsic competition among parasitoids, potentially limiting the  
352 long-term benefits for biological control.

353 *Warming increases the effects of multiple predators on risk of predation*

354 Our results showed that warming led to a higher top-down control than expected with multiple predators.  
355 Indeed, our mathematical model underestimated trophic interaction strength measured in multiple-  
356 predators' treatments at elevated temperature. Our results are in concordance with previous studies on  
357 diverse systems on the importance of considering non-trophic interactions to predict the effect of multiple  
358 predators on top-down control under global changes. Drieu and Rusch (2017) found that predator diversity  
359 enhanced the biological control of insect pests in vineyard under warming due to functional  
360 complementarity among predator species, while effects were substitutive at ambient temperature. Cuthbert  
361 et al. (2021) also found an effect of temperature on intraspecific multiple predator effects on an invasive  
362 Gammaridae species; but effects contrasted ours: risk enhancement at low temperature and risk reduction  
363 with warming. Sentis et al., (2017) found a general trend of predation risk reduction for the prey with  
364 multiple predators in an aquatic food web, but without any effect of temperature on those emergent MPEs.  
365 Our study goes further by showing the important impact of warming on the effects of multiple predators on  
366 prey suppression across multiple assemblages of conspecifics and heterospecifics. In addition to an increase  
367 in prey suppression with multiple predators under warming in terrestrial ecosystems, a diverse predator  
368 community also increases the chances of complementarity in face of environmental variation and  
369 disturbance (Macfadyen, Craze, Polaszek, van Achterberg, & Memmott, 2011). Indeed, presence of  
370 multiple predator species could mitigate negative effects of warming on top-down control due to resource  
371 partitioning and/or functional redundancy (Cebolla, Urbaneja, Baaren, & Tena, 2018; Drieu & Rusch, 2017;



372 Pepi & McMunn, 2021). Preserving predator biodiversity should therefore be generally beneficial for top-  
373 down control under climate change.

374 Here, emergent MPEs were explored with constant initial prey density. But the unimodal relationship  
375 between prey density and trophic interaction strength (i.e., type II functional response) suggests that varying  
376 prey densities might lead to different outcomes for prey suppression with multiple predators (Cuthbert et  
377 al., 2021; Sentis et al., 2017). With prey densities too low or too high, one would fail to detect non-trophic  
378 interactions among predators, while intermediate prey density would result in high resource limitation, and  
379 thus antagonistic interactions among predators. The synergistic effects of multiple predators found in our  
380 study under warming suggested that our experimental design with a single prey density was adequate to  
381 detect emergent MPEs. Because observed degree of infestation did not significantly vary with temperature,  
382 studying the effects of warming on top-down control without investigating MPEs would have failed to  
383 uncover any effects.

#### 384 *Mechanisms behind emergent multiple predator effects on the prey*

385 Because of the synergistic effects of multiple parasitoids on host suppression under warming found in our  
386 study, we could have hypothesized that warming weaken interference between parasitoids, similarly to  
387 predator-prey systems. Indeed, in predator-prey systems, predators have a higher search rate at warmer  
388 temperature, with thus less time for interference (Lang, Rall, & Brose, 2012). However, our host-parasitoid  
389 system allowed us to investigate further the potential mechanisms behind our results, especially the strength  
390 of intrinsic competitive interactions between parasitoids (i.e., frequency of super- and multiparasitism  
391 event). We found generally higher intrinsic competition in multiple parasitoid treatments compared to  
392 single parasitoid treatments, and higher intrinsic competition under warming when the two species were  
393 present compared to ambient temperature. When super- or multi-parasitized, the host was less likely to  
394 survive, maybe because its immune response was less likely to overcome multiple parasitoids. Therefore,  
395 the higher top-down control observed under warming with multiple parasitoids was due to a higher  
396 parasitism pressure, and not because of weaker interactions between parasitoids.

397 Here, the experiments were conducted in simplified laboratory conditions where parasitoids were forced  
398 to share the same habitat (a vial) and overlapped in time (24 hours), which does not allow for resource  
399 partitioning (Ives, Cardinale, & Snyder, 2005). This might have enhanced rate of super- and multi-  
400 parasitism events, and thus top-down control. In nature, warming could also change predator habitat use  
401 (Barton & Schmitz, 2009; Schmitz & Barton, 2014), and phenology (Abarca & Spahn, 2021; Renner &  
402 Zohner, 2018), leading to changes in MPEs. However, the impact of temperature on MPEs was consistent  
403 across parasitoid assemblages, suggesting a general pattern for synergistic effects with multiple natural  
404 enemies under warming in our system.

405 *Parasitoid performance was not affected by temperature, but by parasitoid assemblage*

406 Despite multiple parasitoids enhancing host suppression under warming, successful parasitism rate was  
407 often lower at both temperatures when another parasitoid individual was present, probably due to the strong  
408 intrinsic competitive interactions observed through dissections. A decrease in parasitoid performance would  
409 potentially limit the synergistic effects of multiple parasitoids for host suppression in the long term.  
410 Similarly, another study on *Drosophila*-parasitoid interactions observed a significant impact of thermal  
411 regime on parasitoid success, but still without changes in observed degree of infestation (Delava, Fleury,  
412 & Gibert, 2016). Long-term effects of warming on parasitoid populations are thus uncertain, and hosts from  
413 the next generation might benefit from lower parasitoid abundances due to lower rate of successful  
414 parasitism.

415 *Similar effects of intra- versus interspecific multiple parasitoids on top-down control*

416 Similar to other studies, we did not find significant differences between treatments with multiple  
417 conspecifics or heterospecific predators for prey suppression (Finke & Snyder, 2008; Griffin, Toscano,  
418 Griffen, & Silliman, 2015; Lampropoulos, Perdakis, & Fantinou, 2013). It is therefore important to look at  
419 effects of both predator diversity and density on prey suppression, rather than only using a substitutive  
420 approach (i.e., keeping predator density constant; Ives et al., 2005), which might bias the results. When  
421 niche differentiation is allowed, for example with habitat heterogeneity or longer timeframe that include

422 potential differences in phenology, increase in predator diversity should intensify prey suppression because  
423 of functional diversity rather than because of diversity *per se* (Finke & Snyder, 2008; Greenop et al., 2018;  
424 Krey et al., 2021). Here, two predators of a same species rather than a single predator intensified prey  
425 suppression at warmer temperature despite the small scale of the experiment. Allowing for differentiation  
426 in habitat domain between predator species might have yielded higher prey suppression in treatments with  
427 heterospecifics, and lower rate of multiparasitism. Given the likely ubiquity of resource partitioning in  
428 nature (Chesson, 1991), preserving predator biodiversity would be the best strategy to maintain top-down  
429 control.

#### 430 *No effects of treatments on observed degree of infestation*

431 Prey suppression was generally higher when predator assemblages included the best-performing species,  
432 *Ganaspis sp.*, no matter the predator treatment, nor the temperature. A meta-analysis on the effects of  
433 predator diversity on prey suppression found a similar trend across the 46 studies taken into account (Griffin  
434 et al., 2013), but also found a general positive effect of multiple predators on top-down control.  
435 Contrastingly, a meta-analysis of 108 biological control projects found no relationship between the number  
436 of agents released and biological control success for insect pests (Denoth et al., 2002). However, increasing  
437 predator diversity should be generally beneficial for top-down control by increasing the chances to have a  
438 performant natural enemy species in the mix, as it was the case in our study (i.e., sampling effect model;  
439 Myers et al. 1989). Moreover, presence of multiple species in the community could buffer any mismatch  
440 between predator and prey species induced by warming (Pardikes et al., 2021). *Ganaspis sp.* was the best  
441 performing species for suppression of *D. simulans* across treatments, but its performance decreased with  
442 warming, suggesting that parasitism rate, and therefore host suppression, could also decreased in the longer-  
443 term due to a decrease in parasitoid population.

#### 444 *Conclusion*

445 Overall, pairwise interaction strength generally failed to accurately estimate the trophic interaction strength  
446 observed, indicating that non-trophic interactions must be considered to predict the effects of multiple

447 predators on prey suppression, and in food web studies in general (Kéfi et al., 2012). Previous studies show  
448 altered MPEs with warming due to changes in resource partitioning (Barton & Schmitz, 2009; Cuthbert et  
449 al., 2021), but our study is the first, to our knowledge, to show sign of direct effects of warming on predator  
450 interactions across predator assemblages, resulting in a higher top-down control with multiple predators at  
451 elevated temperature.

## 452 **Acknowledgements**

453 We thank Anna Mácová, Andrea Weberova, Grégoire Proudhon, and Joel Brown for their help during the  
454 setup of the experiments, and Tereza Holicová and Vincent Montbel for their help dissecting the larvae.  
455 The drawings used for Figure 1 was made by Tereza Holicová. We acknowledge funding support from the  
456 Czech Science Foundation grant no. 20-30690S. BR acknowledges the support of iDiv funded by the  
457 German Research Foundation (DFG–FZT 118, 202548816).

## 458 **Author contributions**

459 MT conceived the project; NP and JH contributed to the experimental design; MT, NP, and MG collected  
460 the data; BR provided the methodology and R scripts to estimate functional responses. MT analyzed the  
461 data. All authors contributed critically to the drafts and gave final approval for publication.

## 462 **Competing interests**

463 The author(s) declare no competing interests.

## 464 **Data availability**

465 All data used for this study are available from the Zenodo database: 10.5281/zenodo.5237204.

## 466 **References**

467 Abarca, M., & Spahn, R. (2021). Direct and indirect effects of altered temperature regimes and phenological  
468 mismatches on insect populations. *Current Opinion in Insect Science*.  
469 <https://doi.org/10.1016/j.cois.2021.04.008>

- 470 Barton, B. T., & Schmitz, O. J. (2009). Experimental warming transforms multiple predator effects in a  
471 grassland food web. *Ecology Letters*, *12*(12), 1317–1325. <https://doi.org/10.1111/j.1461->  
472 [0248.2009.01386.x](https://doi.org/10.1111/j.1461-0248.2009.01386.x)
- 473 Boulétreau, M., & Wajnberg, E. (1986). Comparative responses of two sympatric parasitoid cynipids to the  
474 genetic and epigenetic variations of the larvae of their host, *Drosophila melanogaster*. *Entomologia*  
475 *Experimentalis et Applicata*, *41*(2), 107–114. <https://doi.org/10.1111/j.1570-7458.1986.tb00516.x>
- 476 Carton, Y., & Kitano, H. (1981). Evolutionary relationships to parasitism by seven species of the  
477 *Drosophila melanogaster* subgroup. *Biological Journal of the Linnean Society*, *16*(3), 227–241.  
478 <https://doi.org/10.1111/j.1095-8312.1981.tb01849.x>
- 479 Carton, Yves, Poirié, M., & Nappi, A. J. (2008). Insect immune resistance to parasitoids. *Insect Science*,  
480 *15*(1), 67–87. <https://doi.org/10.1111/j.1744-7917.2008.00188.x>
- 481 Cebolla, R., Urbaneja, A., Baaren, J. van, & Tena, A. (2018). Negative effect of global warming on  
482 biological control is mitigated by direct competition between sympatric parasitoids. *Biological*  
483 *Control*, *122*, 60–66. <https://doi.org/10.1016/j.biocontrol.2018.04.006>
- 484 Chesson, P. (1991). A need for niches? *Trends in Ecology and Evolution*, *6*(1), 26–28.  
485 [https://doi.org/10.1016/0169-5347\(91\)90144-M](https://doi.org/10.1016/0169-5347(91)90144-M)
- 486 Cuthbert, R. N., Wasserman, R. J., Dalu, T., & Briski, E. (2021). Warming mediates intraspecific multiple  
487 predator effects from an invasive crustacean. *Marine Biology*, *168*(3), 35.  
488 <https://doi.org/10.1007/s00227-021-03840-z>
- 489 Davis, A. J., Lawton, J. H., Shorrocks, B., & Jenkinson, L. S. (1998). Individualistic species responses  
490 invalidate simple physiological models of community dynamics under global environmental change.  
491 *Journal of Animal Ecology*, *67*(4), 600–612. <https://doi.org/10.1046/j.1365-2656.1998.00223.x>
- 492 Delava, E., Fleury, F., & Gibert, P. (2016). Effects of daily fluctuating temperatures on the *Drosophila*–  
493 *Leptopilina boulardi* parasitoid association. *Journal of Thermal Biology*, *60*, 95–102.  
494 <https://doi.org/10.1016/j.jtherbio.2016.06.012>
- 495 Denoth, M., Frid, L., & Myers, J. H. (2002). Multiple agents in biological control: Improving the odds?

- 496 *Biological Control*, 24(1), 20–30. [https://doi.org/10.1016/S1049-9644\(02\)00002-6](https://doi.org/10.1016/S1049-9644(02)00002-6)
- 497 Drieu, R., & Rusch, A. (2017). Conserving species-rich predator assemblages strengthens natural pest  
498 control in a climate warming context. *Agricultural and Forest Entomology*, 19(1), 52–59.  
499 <https://doi.org/10.1111/afe.12180>
- 500 Fernández-Arhex, V., & Corley, J. C. (2003). The functional response of parasitoids and its implications  
501 for biological control. *Biocontrol Science and Technology*, 13(4), 403–413.  
502 <https://doi.org/10.1080/0958315031000104523>
- 503 Finke, D. L., & Snyder, W. E. (2008). Niche partitioning increases resource exploitation by diverse  
504 communities. *Science*, 321(5895), 1488–1490. <https://doi.org/10.1126/science.1160854>
- 505 Godfray, H. C. J. (2013). Parasitoids. In *Encyclopedia of Biodiversity: Second Edition* (Vol. 14, pp. 674–  
506 682). <https://doi.org/10.1016/B978-0-12-384719-5.00152-0>
- 507 Greenop, A., Woodcock, B. A., Wilby, A., Cook, S. M., & Pywell, R. F. (2018). Functional diversity  
508 positively affects prey suppression by invertebrate predators: a meta-analysis. *Ecology*, 99(8), 1771–  
509 1782. <https://doi.org/10.1002/ecy.2378>
- 510 Griffin, J. N., Byrnes, J. E. K., & Cardinale, B. J. (2013). Effects of predator richness on prey suppression:  
511 A meta-analysis. *Ecology*, 94(10), 2180–2187. <https://doi.org/10.1890/13-0179.1>
- 512 Griffin, J. N., Toscano, B. J., Griffen, B. D., & Silliman, B. R. (2015). Does relative abundance modify  
513 multiple predator effects? *Basic and Applied Ecology*, 16(7), 641–651.  
514 <https://doi.org/10.1016/j.baae.2015.05.003>
- 515 Hance, T., Baaren, J. van, Vernon, P., & Boivin, G. (2007). Impact of extreme temperatures on parasitoids  
516 in a climate change perspective. *Annual Review of Entomology*, 52(1), 107–126.  
517 <https://doi.org/10.1146/annurev.ento.52.110405.091333>
- 518 Hartig, F. (2019). DHARMA: Residual Diagnostics for Hierarchical (Multi-Level / Mixed) Regression  
519 Models. Retrieved from <http://florianhartig.github.io/DHARMA/>
- 520 Harvey, J. A., Poelman, E. H., & Tanaka, T. (2013). Intrinsic inter- and intraspecific competition in  
521 parasitoid wasps. *Annual Review of Entomology*, 58(1), 333–351. <https://doi.org/10.1146/annurev->

522 ento-120811-153622

523 Holling, C. S. (1959). Some characteristics of simple types of predation and parasitism. *Canadian*  
524 *Entomologist*, 91(7), 385–398. Retrieved from  
525 [http://people.math.gatech.edu/~weiss/uploads/5/8/6/1/58618765/holling\\_some\\_characteristics\\_of\\_si](http://people.math.gatech.edu/~weiss/uploads/5/8/6/1/58618765/holling_some_characteristics_of_simple_types_of_predation_and_parasitism.pdf)  
526 [mple\\_types\\_of\\_predation\\_and\\_parasitism.pdf](http://people.math.gatech.edu/~weiss/uploads/5/8/6/1/58618765/holling_some_characteristics_of_simple_types_of_predation_and_parasitism.pdf)

527 Ives, A. R., Cardinale, B. J., & Snyder, W. E. (2005). A synthesis of subdisciplines: Predator-prey  
528 interactions, and biodiversity and ecosystem functioning. *Ecology Letters*, 8(1), 102–116.  
529 <https://doi.org/10.1111/j.1461-0248.2004.00698.x>

530 Jeffs, C. T., Terry, J. C. D., Higgie, M., Jandová, A., Konvičková, H., Brown, J. J., ... Lewis, O. T. (2021).  
531 Molecular analyses reveal consistent food web structure with elevation in rainforest *Drosophila* -  
532 parasitoid communities. *Ecography*, 44(3), 403–413. <https://doi.org/10.1111/ecog.05390>

533 Kéfi, S., Berlow, E. L., Wieters, E. A., Joppa, L. N., Wood, S. A., Brose, U., & Navarrete, S. A. (2015).  
534 Network structure beyond food webs: Mapping non-trophic and trophic interactions on Chilean rocky  
535 shores. *Ecology*, 96(1), 291–303. <https://doi.org/10.1890/13-1424.1>

536 Kéfi, S., Berlow, E. L., Wieters, E. A., Navarrete, S. A., Petchey, O. L., Wood, S. A., ... Brose, U. (2012).  
537 More than a meal... integrating non-feeding interactions into food webs. *Ecology Letters*, 15(4), 291–  
538 300. <https://doi.org/10.1111/j.1461-0248.2011.01732.x>

539 Kehoe, R., Frago, E., & Sanders, D. (2020). Cascading extinctions as a hidden driver of insect decline.  
540 *Ecological Entomology*, een.12985. <https://doi.org/10.1111/een.12985>

541 Krey, K. L., Smith, O. M., Chapman, E. G., Crossley, M. S., Crowder, D. W., Fu, Z., ... Snyder, W. E.  
542 (2021). Prey and predator biodiversity mediate aphid consumption by generalists. *Biological Control*,  
543 160, 104650. <https://doi.org/10.1016/j.biocontrol.2021.104650>

544 Lampropoulos, P. D., Perdikis, D. C., & Fantinou, A. A. (2013). Are multiple predator effects directed by  
545 prey availability? *Basic and Applied Ecology*, 14(7), 605–613.  
546 <https://doi.org/10.1016/j.baae.2013.08.004>

547 Lang, B., Rall, B. C., & Brose, U. (2012). Warming effects on consumption and intraspecific interference

- 548 competition depend on predator metabolism. *Journal of Animal Ecology*, *81*(3), 516–523.  
549 <https://doi.org/10.1111/j.1365-2656.2011.01931.x>
- 550 Laubmeier, A. N., Rebarber, R., & Tenhumberg, B. (2020). Towards understanding factors influencing the  
551 benefit of diversity in predator communities for prey suppression. *Ecosphere*, *11*(10), e03271.  
552 <https://doi.org/10.1002/ecs2.3271>
- 553 Lenth, R. V. (2018). Emmeans: Estimated marginal means, aka least-squares means. *R Package Version*.
- 554 Lüdecke, D., Makowski, D., & Waggoner, P. (2019). *Performance: Assessment of regression models*  
555 *performance*. Retrieved from <https://cran.r-project.org/package=performance>
- 556 Lue, C.-H., Buffington, M. L., Scheffer, S., Lewis, M., Elliott, T. A., Lindsey, A. R. I., ... Hrcek, J. (2021).  
557 DROP: Molecular voucher database for identification of *Drosophila* parasitoids. *Molecular Ecology*  
558 *Resources*. <https://doi.org/10.1111/1755-0998.13435>
- 559 Macfadyen, S., Craze, P. G., Polaszek, A., van Achterberg, K., & Memmott, J. (2011). Parasitoid diversity  
560 reduces the variability in pest control services across time on farms. *Proceedings of the Royal Society*  
561 *B: Biological Sciences*, *278*(1723), 3387–3394. <https://doi.org/10.1098/rspb.2010.2673>
- 562 McCoy, M. W., Stier, A. C., & Osenberg, C. W. (2012). Emergent effects of multiple predators on prey  
563 survival: The importance of depletion and the functional response. *Ecology Letters*, *15*(12), 1449–  
564 1456. <https://doi.org/10.1111/ele.12005>
- 565 Myers, J. H., Higgins, C., & Kovacs, E. (1989). How many insect species are necessary for the biological  
566 control of insects? *Environmental Entomology*, *18*(4), 541–547. <https://doi.org/10.1093/ee/18.4.541>
- 567 Northfield, T. D., Snyder, G. B., Ives, A. R., & Snyder, W. E. (2010). Niche saturation reveals resource  
568 partitioning among consumers. *Ecology Letters*, *13*(3), 338–348. [https://doi.org/10.1111/j.1461-](https://doi.org/10.1111/j.1461-0248.2009.01428.x)  
569 [0248.2009.01428.x](https://doi.org/10.1111/j.1461-0248.2009.01428.x)
- 570 Nouhaud, P., Mallard, F., Poupardin, R., Barghi, N., & Schlötterer, C. (2018). High-throughput fecundity  
571 measurements in *Drosophila*. *Scientific Reports*, *8*(1), 4469. [https://doi.org/10.1038/s41598-018-](https://doi.org/10.1038/s41598-018-22777-w)  
572 [22777-w](https://doi.org/10.1038/s41598-018-22777-w)
- 573 Pachauri, R. K., Meyer, L., Hallegatte France, S., Bank, W., Hegerl, G., Brinkman, S., ... van Boxmeer, F.



- 574 (2014). *IPCC, 2014: Climate Change 2014: Synthesis Report. Contribution of Working Groups I, II*  
575 *and III to the Fifth Assessment Report of the Intergovernmental Panel on Climate Change e [Core*  
576 *Writing Team, R.K. Pachauri and L.A. Meyer (eds.)]. IPCC. IPCC, Geneva, Switzerland. Retrieved*  
577 *from <http://www.ipcc.ch>.*
- 578 Pardikes, N., Revilla, T., Lue, C.-H., Thierry Mélanie, Soutos-Villaros, D., & Hrcek, J. (2021). Community  
579 context modifies response of host-parasitoid interactions to phenological mismatch under warming.  
580 *Authorea*. <https://doi.org/10.22541/au.162454818.82806593/v1>
- 581 Parmesan, C. (2006). Ecological and evolutionary responses to recent climate change. *Annual Review of*  
582 *Ecology, Evolution, and Systematics*, 37(1), 637–669.  
583 <https://doi.org/10.1146/annurev.ecolsys.37.091305.110100>
- 584 Pedersen, B. S., & Mills, N. J. (2004). Single vs. multiple introduction in biological control: The roles of  
585 parasitoid efficiency, antagonism and niche overlap. *Journal of Applied Ecology*, 41(5), 973–984.  
586 <https://doi.org/10.1111/j.0021-8901.2004.00953.x>
- 587 Pepi, A., & McMunn, M. (2021). Predator diversity and thermal niche complementarity attenuate indirect  
588 effects of warming on prey survival. *American Naturalist*. <https://doi.org/10.1086/714590>
- 589 Rall, B. Ö. C., Vucic-Pestic, O., Ehnes, R. B., Emmerson, M., & Brose, U. (2010). Temperature, predator-  
590 prey interaction strength and population stability. *Global Change Biology*, 16(8), 2145–2157.  
591 <https://doi.org/10.1111/j.1365-2486.2009.02124.x>
- 592 Renner, S. S., & Zohner, C. M. (2018). Climate change and phenological mismatch in trophic interactions  
593 among plants, insects, and vertebrates. *Annual Review of Ecology, Evolution, and Systematics*, 49(1),  
594 165–182. <https://doi.org/10.1146/annurev-ecolsys-110617-062535>
- 595 Resetarits, W. J., Bohenek, J. R., & Pintar, M. R. (2021). Predator-specific responses and emergent multi-  
596 predator effects on oviposition site choice in grey treefrogs, *Hyla chrysoscelis*. *Proceedings of the*  
597 *Royal Society B: Biological Sciences*, 288(1950). <https://doi.org/10.1098/rspb.2021.0558>
- 598 Rosenbaum, B., & Rall, B. C. (2018). Fitting functional responses: Direct parameter estimation by  
599 simulating differential equations. *Methods in Ecology and Evolution*, 9(10), 2076–2090.

- 600 <https://doi.org/10.1111/2041-210X.13039>
- 601 Schmitz, O. J. (2007). Predator diversity and trophic interactions. *Ecology*, 88(10), 2415–2426.
- 602 <https://doi.org/10.1890/06-0937.1>
- 603 Schmitz, O. J. (2009). Effects of predator functional diversity on grassland ecosystem function. *Ecology*,
- 604 90(9), 2339–2345. <https://doi.org/10.1890/08-1919.1>
- 605 Schmitz, O. J., & Barton, B. T. (2014). Climate change effects on behavioral and physiological ecology of
- 606 predator-prey interactions: Implications for conservation biological control. *Biological Control*, 75,
- 607 87–96. <https://doi.org/10.1016/j.biocontrol.2013.10.001>
- 608 Sentis, A., & Boukal, D. S. (2018). On the use of functional responses to quantify emergent multiple
- 609 predator effects. *Scientific Reports*, 8(1), 1–12. <https://doi.org/10.1038/s41598-018-30244-9>
- 610 Sentis, A., Gémard, C., Jaugeon, B., & Boukal, D. S. (2017). Predator diversity and environmental change
- 611 modify the strengths of trophic and nontrophic interactions. *Global Change Biology*, 23(7), 2629–
- 612 2640. <https://doi.org/10.1111/gcb.13560>
- 613 Sih, A., Englund, G., & Wooster, D. (1998). Emergent impacts of multiple predators on prey. *Trends in*
- 614 *Ecology and Evolution*, 13(9), 350–355. [https://doi.org/10.1016/S0169-5347\(98\)01437-2](https://doi.org/10.1016/S0169-5347(98)01437-2)
- 615 Soetaert, K., & Petzoldt, T. (2010). Inverse modelling, sensitivity and monte carlo analysis in R using
- 616 package FME. *Journal of Statistical Software*, 33(3), 1–28. <https://doi.org/10.18637/jss.v033.i03>
- 617 Sohlström, E. H., Archer, L. C., Gallo, B., Jochum, M., Kordas, R. L., Rall, B. C., ... O’Gorman, E. J.
- 618 (2021). Thermal acclimation increases the stability of a predator-prey interaction in warmer
- 619 environments. *Global Change Biology*, gcb.15715. <https://doi.org/10.1111/gcb.15715>
- 620 Soluk, D. A. (1993). Multiple predator effects: predicting combined functional response of stream fish and
- 621 invertebrate predators. *Ecology*, 74(1), 219–225. <https://doi.org/10.2307/1939516>
- 622 Song, C., Von Ahn, S., Rohr, R. P., & Saavedra, S. (2020). Towards a probabilistic understanding about
- 623 the context-dependency of species interactions. *Trends in Ecology and Evolution*, 35(5), 384–396.
- 624 <https://doi.org/10.1016/j.tree.2019.12.011>
- 625 Team, R. C. (2017, January 29). R: The R Project for statistical computing. Retrieved from <https://www.r->

626 project.org/  
627 Thierry, M., Hrč​ek, J., & Lewis, O. T. (2019). Mechanisms structuring host–parasitoid networks in a global  
628 warming context: a review. *Ecological Entomology*, *een.12750*. <https://doi.org/10.1111/een.12750>  
629 Thierry, M., Pardikes, N. A., Lue, C. H., Lewis, O. T., & Hrč​ek, J. (2021). Experimental warming influences  
630 species abundances in a *Drosophila* host community through direct effects on species performance  
631 rather than altered competition and parasitism. *PLoS One*, *16*(2), e0245029.  
632 <https://doi.org/10.1371/journal.pone.0245029>  
633 Thierry, M., Pardikes, N. A., Ximénez-Embún, M. G., Proudhom, G., & Hrč​ek, J. (2021). Multiple  
634 parasitoid species enhance top-down control, but parasitoid performance is context-dependent.  
635 *BioRxiv*, 2021.07.16.452484. <https://doi.org/10.1101/2021.07.16.452484>  
636 Tylianakis, J. M., & Romo, C. M. (2010). Natural enemy diversity and biological control: making sense of  
637 the context-dependency. *Basic and Applied Ecology*, *11*(8), 657–668.  
638 <https://doi.org/10.1016/j.baae.2010.08.005>  
639 Uszko, W., Diehl, S., Englund, G., & Amarasekare, P. (2017, April 1). Effects of warming on predator–  
640 prey interactions – a resource-based approach and a theoretical synthesis. *Ecology Letters*. Blackwell  
641 Publishing Ltd. <https://doi.org/10.1111/ele.12755>  
642 Voigt, W., Perner, J., Davis, A. J., Eggers, T., Schumacher, J., Bährmann, R., ... Sander, F. W. (2003).  
643 Trophic levels are differentially sensitive to climate. *Ecology*, *84*(9), 2444–2453.  
644 <https://doi.org/10.1890/02-0266>  
645 Wagner, D. L., Grames, E. M., Forister, M. L., Berenbaum, M. R. C., & Stopak, D. (2021). Insect decline  
646 in the Anthropocene: Death by a thousand cuts. *Proceedings of the National Academy of Sciences*,  
647 *118*(2). <https://doi.org/10.1073/pnas.2023989118>  
648 Wootton, J. T. (1997). Estimates and tests of per capita interaction strength: Diet, abundance, and impact  
649 of intertidally foraging birds. *Ecological Monographs*, *67*(1), 45–64. [https://doi.org/10.1890/0012-9615\(1997\)067\[0045:EATOPC\]2.0.CO;2](https://doi.org/10.1890/0012-9615(1997)067[0045:EATOPC]2.0.CO;2)  
650  
651

652 **Table 1.** Odds ratios of a successful parasitism event between parasitoid treatments (single parasitoid, two  
653 parasitoids conspecific, and two parasitoids heterospecific) for each parasitoid species. Results are averaged  
654 over both temperatures because there was no significant interaction between temperature and parasitoid  
655 treatments. Values less than or greater than one denote a decrease or an increase in the odds of successful  
656 parasitism, respectively. Significant differences are highlighted in bold.

| Parasitoid species     | Contrast                     | Odds Ratio   | P-value           |
|------------------------|------------------------------|--------------|-------------------|
| <i>Ganaspis sp.</i>    | 2 conspecifics/single        | <b>0.043</b> | <b>&lt;0.0001</b> |
|                        | 2 heterospecifics/single     | <b>0.166</b> | <b>0.0007</b>     |
|                        | heterospecifics/conspecifics | <b>3.876</b> | <b>&lt;0.0001</b> |
| <i>Asobara sp.</i>     | 2 conspecifics/single        | <b>0.448</b> | <b>0.036</b>      |
|                        | 2 heterospecifics/single     | 0.711        | 0.484             |
|                        | heterospecifics/conspecifics | 1.589        | 0.251             |
| <i>Leptopilina sp.</i> | 2 conspecifics/single        | 0.182        | 0.494             |
|                        | 2 heterospecifics/single     | 0.871        | 0.994             |
|                        | heterospecifics/conspecifics | 4.764        | 0.295             |

657

658 **Figure legends**

659

660 **Figure 1.** Schematic representation of the experimental design. (a) One single parasitoid female with either  
661 5, 10, 25, 50 or 100 *D. simulans* per 10 mL of media, (b) two parasitoids conspecific or (c) two parasitoids  
662 heterospecific with 50 *D. simulans* per 10 mL of media. (d) Rearing until adults emerge for Experiments 1  
663 and 2 (up to 41 days), or (e) dissection of 10 3<sup>rd</sup> instar larvae or pupae per vial two, three or four days after  
664 infection for Experiment 3.

665

666 **Figure 2.** Differences between observed and estimated degree of infestation (DI) for each parasitoid  
667 assemblage and temperature. Negative values translate to risk reduction while positive values reflect risk  
668 enhancement for the host with multiple parasitoids. Light grey panel: two parasitoids conspecific, darker  
669 grey panel; two parasitoids heterospecific. Parasitoid abbreviations: A: *Asobara sp.*, L: *Leptopilina sp.*, and  
670 G: *Ganaspis sp.* Big dots represent the means ( $\pm$ SE), and small dots represent raw data.

671

672 **Figure 3.** Frequency of super- or multiparasitism events out of the total of parasitized hosts per vial  
673 significantly changed depending on parasitoid assemblage and temperature regime. Within each plot,  
674 different small letters denote significant differences between parasitoid assemblages (and temperature  
675 regime if significant). White panel: single parasitoid, light grey panel: two parasitoids conspecific, darker  
676 grey panel; two parasitoids heterospecific. Parasitoid abbreviations: A: *Asobara sp.*, and G: *Ganaspis sp.*  
677 Big dots represent the estimated means ( $\pm$ 95% CIs) and small dots represent raw data.

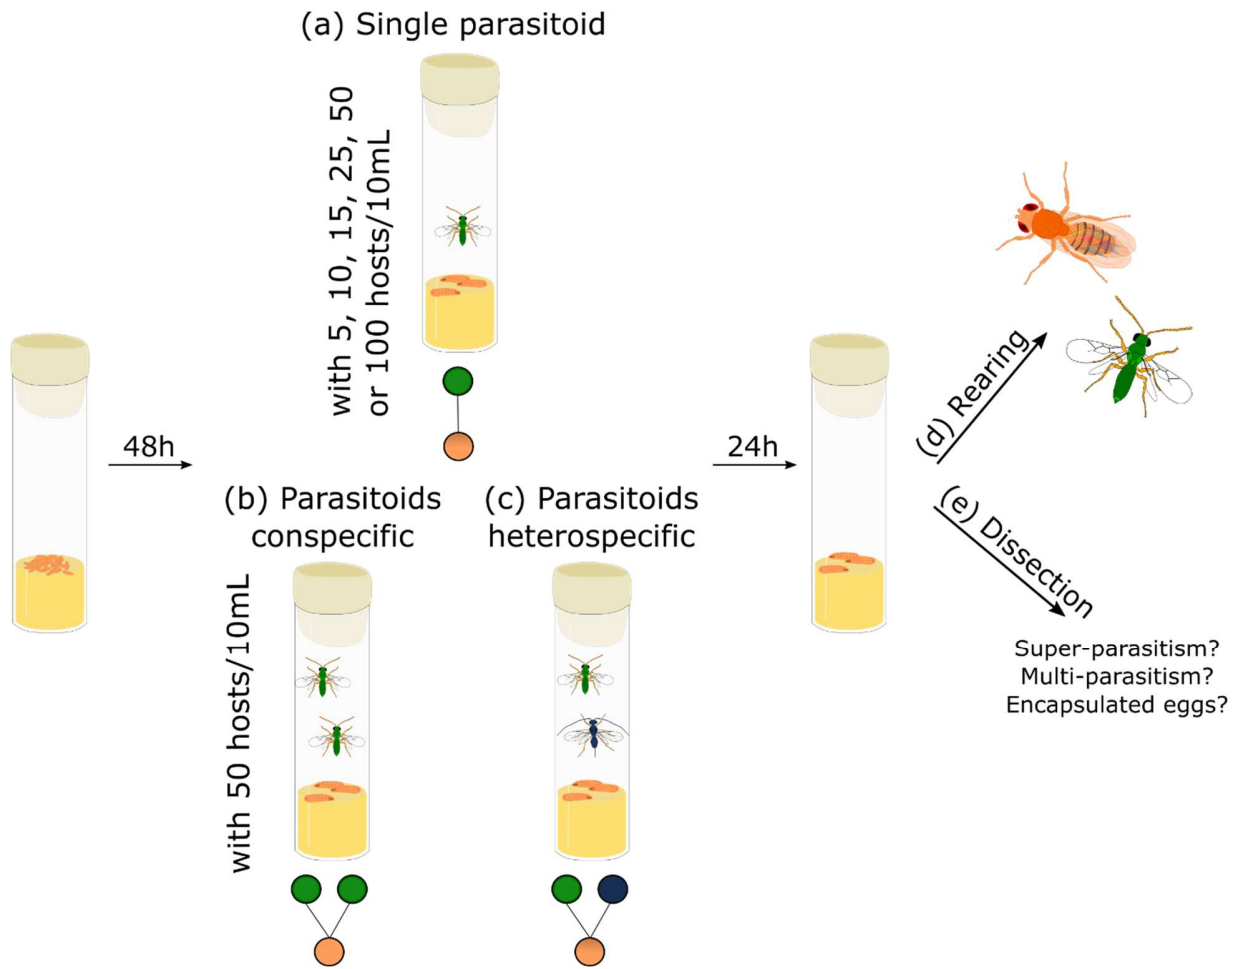

678

679 **Figure 1.**

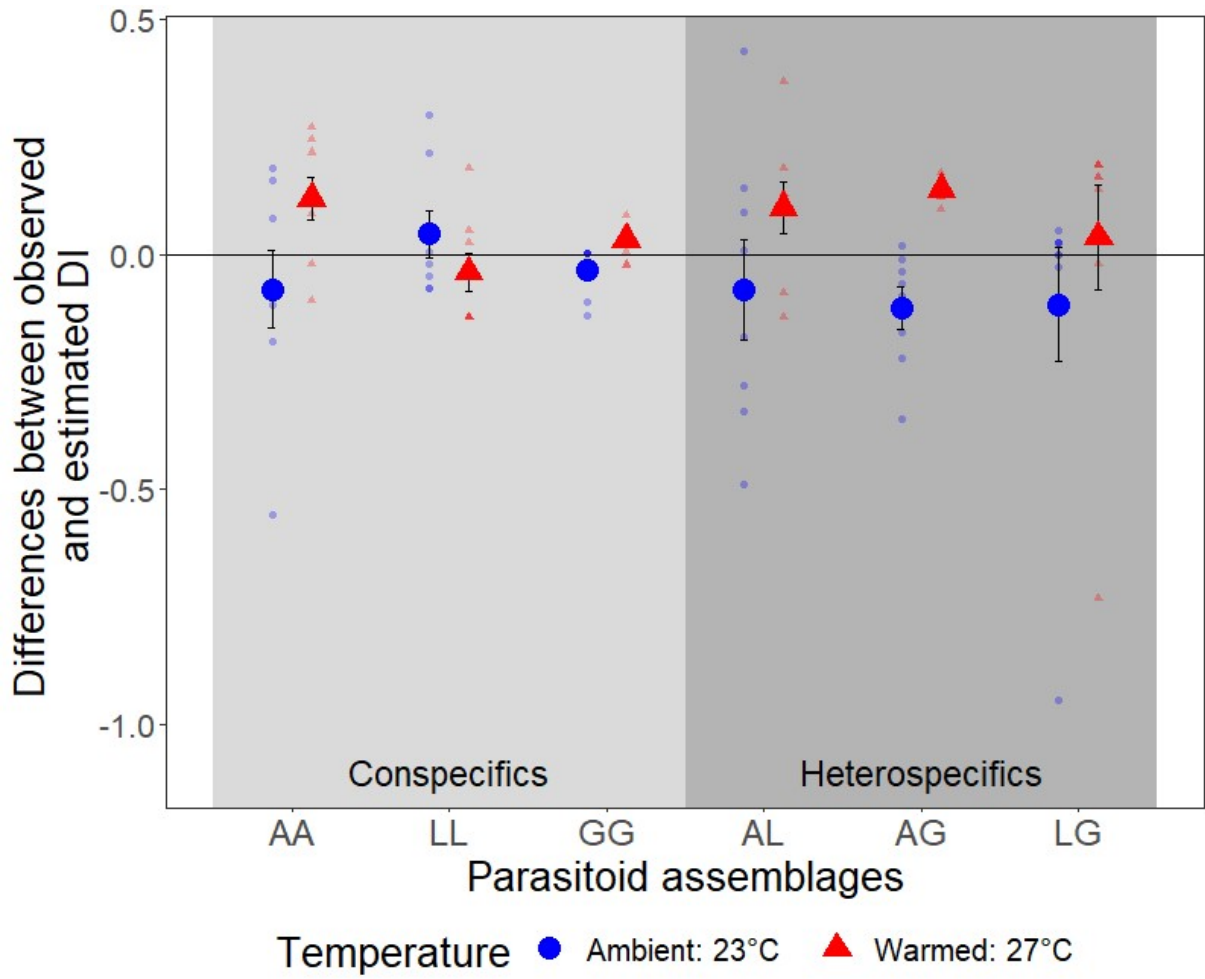

680

681 **Figure 2.**

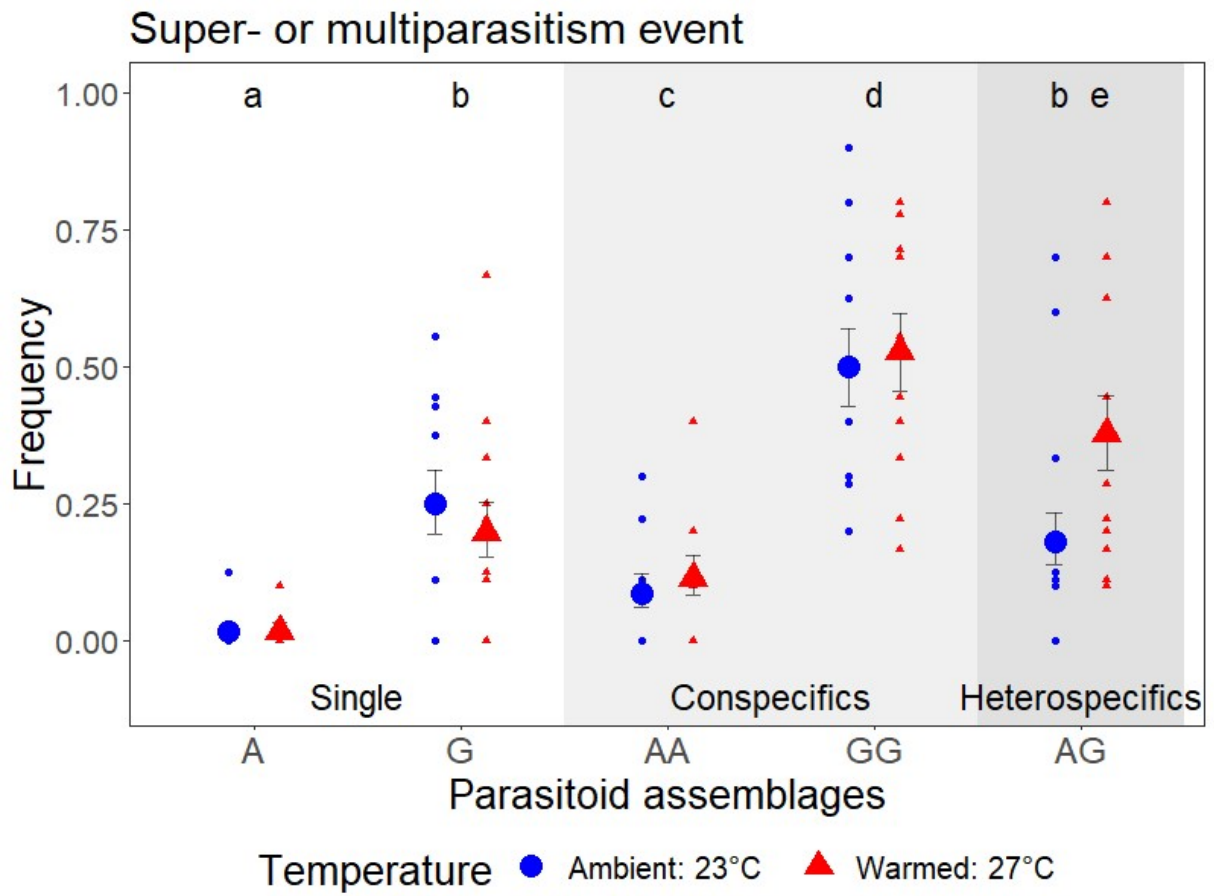

682

683 **Figure 3.**
