1 Presence of multiple parasitoids decreases host survival under warming,  
2 but parasitoid performance also decreases

3 **Mélanie Thierry**<sup>\*1,2</sup>, **Nicholas A. Pardikes**<sup>2</sup>, **Benjamin Rosenbaum**<sup>3,4</sup>, **Miguel G. Ximénez-Embún**<sup>2</sup>, &  
4 **Jan Hrčěk**<sup>1,2</sup>

5 <sup>1</sup>University of South Bohemia, Faculty of Science, Branisovska 31, 37005, Czech Republic

6 <sup>2</sup>Biology Centre of the Czech Academy of Sciences, Institute of Entomology, Branisovska 31, 37005,  
7 Czech Republic

8 <sup>3</sup>Theory in Biodiversity Science, German Centre for Integrative Biodiversity Research (iDiv), Halle-Jena-  
9 Leipzig, Puschstr. 4, 04103 Leipzig, Germany

10 <sup>4</sup>Institute of Biodiversity, Friedrich Schiller University Jena, Dornburger Str. 159, 07743 Jena, Germany

11 \* Corresponding author: [melanie.thierry34@gmail.com](mailto:melanie.thierry34@gmail.com)

12

13 **Running title:** Warming alters multiple predator effects

14 **Abstract.** Current global changes are reshaping ecological communities and modifying environmental  
15 conditions. We need to recognize the combined impact of these biotic and abiotic factors on species  
16 interactions, community dynamics and ecosystem functioning. Specifically, the strength of predator-prey  
17 interactions often depends on the presence of other natural enemies: it weakens with competition and  
18 interference, or strengthens with facilitation. Such effects of multiple predators on prey are likely to be  
19 affected by changes in the abiotic environment, altering top-down control, a key structuring force in both  
20 natural and agricultural ecosystems. Here, we investigated how warming alters the effects of multiple  
21 predators on prey suppression using a dynamic model coupled with empirical laboratory experiments with  
22 *Drosophila*-parasitoid communities. While multiple parasitoids enhanced top-down control under  
23 warming, parasitoid performance generally declined when another parasitoid was present due to  
24 competitive interactions, which could reduce top-down control in the long-term. Our study highlights the  
25 importance of accounting for interactive effects between abiotic and biotic factors to better predict  
26 community dynamics in a rapidly changing world, and thus better preserve ecosystem functioning and  
27 services such as biological control.

28 **Keywords:** biodiversity-ecosystem functioning, global change, temperature, functional response, host-  
29 parasitoid networks, multiple predator effects

## 30 **Introduction**

31 Ongoing global anthropogenic changes are altering the abiotic context, which can change the outcome  
32 of species interactions [1,2]. Global warming can weaken the strength of trophic interactions due to changes  
33 in metabolic rates [3], shifts in spatial distributions and seasonal phenology [4], lethal effects on predators,  
34 or altered attack rates [5–7]. But warming does also alter the strength of non-trophic interactions among  
35 predators [8,9]. Altered non-trophic interactions among predators would change the effects of multiple  
36 predators on top-down control [10,11], yet to what extent is unclear. Effects of warming on non-trophic  
37 interactions among predators are often overlooked, but essential to accurately forecast ecological  
38 consequences of warming for biological control and ecosystems integrity.

39 The effects of multiple predators on prey suppression are often not additive. Additivity would occur if  
40 predators have independent effects on prey, in which case predator density should enhance top-down  
41 control because of a higher predatory pressure on the prey. However, direct and indirect interactions among  
42 predators may cause effects to deviate from additivity [12–14]. The effects of multiple predators on prey  
43 can be synergistic (i.e., the effects are greater than what would be expected if they were additive) due to  
44 niche complementarity or facilitation (i.e., risk enhancement for the prey) [15]. By contrast, the effects of  
45 multiple predators on prey can be antagonistic due to intraguild predation, competition, or interference  
46 when the degree of overlap between predator’s foraging areas or phenologies is too high (i.e., risk reduction)  
47 [16]. All such potential effects are referred to as multiple predator effects (MPEs [17]). Emergent MPEs  
48 are particularly important in biological control where introduction of one or several predator species might  
49 result in risk reduction for the prey because of competition among predators instead of planned risk  
50 enhancement [18].

51 Warming can alter both trophic and non-trophic interactions. Changes in the strength of these  
52 interactions could modify emergent MPEs, either enhancing or decreasing top-down control. Climate  
53 change also disrupts species composition of communities [4,19], which would change the outcome of  
54 pairwise interactions that are influenced by other species in the community [20–22]. Changes in species

55 composition of communities are thus also likely to alter MPEs, affecting biological control. However,  
56 interactive effects between warming and community composition on top-down control remain poorly  
57 studied, and little is known about how warming alters the effects of multiple predators on top-down control.

58 Here, we used mathematical models in combination with a series of three laboratory experiments on  
59 *Drosophila simulans* and three of its co-occurring larval parasitoids to investigate the effects of warming  
60 on multiple predator effects for top-down control. Host-parasitoid interactions are a particular type of  
61 predator-prey interaction in which parasitoid larvae feed and develop inside or on an arthropod host, while  
62 adults are free living [23]. When parasitized, three outcomes are possible: the parasitoid successfully  
63 develops, the host successfully eliminates its parasitoid through immune response (i.e., encapsulation and  
64 melanization) and survives [24], or both parties die. When multiple parasitoids are present, they can  
65 compete extrinsically as adults for space and oviposition (i.e., interference), and intrinsically within a host  
66 [25]. Intrinsic competition is the result of a super- and/or multiparasitism events when two parasitoids -  
67 conspecifics or heterospecifics respectively - parasitize the same host individual. In solitary parasitoids,  
68 such as the species used in the present study, only one individual completes its development in each host,  
69 suppressing the other(s) physically or physiologically. However, both parasitoid species can be observed  
70 as eggs or larvae inside the host by dissecting the host larva. Parasitoids represent an excellent system to  
71 study how warming directly changes the effects of multiple predators on top-down control because the  
72 outcome of the interactions is directly observed by rearing the host, and intrinsic competitive interactions  
73 between parasitoids can be observed by dissecting the host larva. In this study, we empirically measured  
74 trophic interaction strength across temperatures and parasitoid assemblages. We recorded emergent effects  
75 of multiple parasitoids on host suppression by comparing empirical data with estimates in which multiple  
76 parasitoids would not interact (i.e., would have additive effect) using a mathematical model for multiple  
77 co-occurring parasitoids with a functional response approach [26,27]. With this framework, we addressed  
78 three specific questions: (1) Do multiple parasitoids have additive, synergistic, or antagonistic effects on  
79 host suppression? (2) To what extent does temperature modify the outcomes of MPEs? (3) Are changes in

80 host immune response or competitive interaction strength causing emergent MPEs? Our results demonstrate  
81 the prevalent role of temperature for non-trophic interactions among parasitoids, with cascading effects on  
82 host suppression.

## 83 **Materials and Methods**

### 84 *Biological system*

85 Cultures of *Drosophila simulans* and their associated parasitoids collected from two tropical rainforest  
86 locations in North Queensland Australia: Paluma (S18° 59.031' E146° 14.096') and Kirrama Range (S18°  
87 12.134' E145° 53.102'; both <100 m above sea level; [28]) were used for the experiments. Tropical species  
88 are already living close to their upper thermal limits [29], and *Drosophila* species are limited in their  
89 evolutionary potential for thermal adaptation [30,31], making our tropical *Drosophila*-parasitoid  
90 community a relevant system to study effects of future warming conditions on communities. *D. simulans*  
91 and parasitoid cultures were established between 2017 and 2018, identified using both morphology and  
92 DNA barcoding, and shipped to the Czech Republic under permit no. PWS2016-AU-002018 from  
93 Australian Government, Department of the Environment. All cultures were maintained at 23°C and 12:12  
94 hour light and dark cycle at Biology Centre, Czech Academy of Sciences. The three larval parasitoid species  
95 *Asobara sp.* (Braconidae: Alysiinae; strain KHB, reference voucher no. USNMENT01557097, reference  
96 sequence BOLD process ID: DROP043-21), *Leptopilina sp.* (Figitidae: Eucolinae; strain 111F, reference  
97 voucher no. USNMENT01557117, reference sequence BOLD process ID: DROP053-21), and *Ganaspis*  
98 *sp.* (Figitidae: Eucolinae; strain 84BC, reference voucher no. USNMENT01557102 and  
99 USNMENT01557297, reference sequence BOLD process ID: DROP164-21) were used (for more details  
100 on the parasitoid strains see [32]). *Drosophila simulans* isofemale lines were kept on standard *Drosophila*  
101 medium (corn flour, yeast, sugar, agar and methyl-4-hydroxybenzoate) for approximately 45 to 70 non-  
102 overlapping generations before the experiments. To revive genetic variation, five host lines were combined  
103 to establish two population cages of mass-bred lines prior the start of the experiments. Single parasitoid  
104 isofemale lines were used and maintained for approximately 25 to 40 non-overlapping generations prior to

105 the start of the experiment by providing them every week with two-day-old larvae of a different *Drosophila*  
106 species – *Drosophila melanogaster*.

### 107 *Experiments*

108 To investigate the effects of warming on the strength of trophic and non-trophic interactions, we used a  
109 functional response approach following Mccoy's framework [26]. We first obtained the parameters of each  
110 parasitoid functional response at ambient and warmed temperatures with single-parasitoid treatments  
111 (Experiment 1). Then, we used these functional response parameter estimates to predict trophic interaction  
112 strength for each temperature and parasitoid combination with the null hypothesis that parasitoids were not  
113 interacting, and thus had additive effects on host suppression. In Experiment 2 we empirically measured  
114 the effects of temperature and parasitoid combinations on trophic interaction strength, and compared the  
115 predicted and observed values to identify emergent effects of multiple parasitoids on host suppression and  
116 their dependence on the temperature regime. The two first blocks of Experiment 1 and entire Experiment 2  
117 were performed in parallel, and controls and single-parasitoid treatments were common to both  
118 experiments. In Experiment 3, we investigated the mechanisms of multiple parasitoid effects by dissecting  
119 hosts rather than rearing them. This allowed us to measure rates of super- and multiparasitism and  
120 encapsulation depending on the temperature regime and parasitoid combinations.

121 A total of 22,920 *D. simulans* eggs were collected: 13,120 for experiment 1, 4,800 for experiment 2 [of  
122 which 12,990 (73%) successfully emerged as adults (8,409 hosts and 4,581 parasitoids)], and 5,000 for  
123 experiment 3 from which 1,000 larvae were dissected.

### 124 *Experiment 1: Single-parasitoid experiment*

125 Eggs of *D. simulans* were placed in a single 90 mm high and 28 mm diameter glass vial with 10mL of  
126 *Drosophila* media at six different densities (5, 10, 15, 25, 50 or 100 eggs per 10mL of food media in vial;  
127 Figure 1a). To collect *D. simulans* eggs, an egg-washing protocol was adapted from [33]. The day before  
128 the egg-washing protocol was conducted, two batches of egg-laying medium (petri dishes with agar gel  
129 topped with yeast paste) were introduced in each population cage for flies to laying eggs overnight. Eggs

130 were transferred in the experimental vials. Half of the vials were placed at ambient temperature ( $22.7^{\circ}\text{C} \pm$   
131  $0.4$  s.d. - current mean yearly temperature at the two study sites [28]), and the other half at warmed  
132 temperature ( $27.4^{\circ}\text{C} \pm 0.5$  s.d. - projected change in global mean surface temperature for the late 21<sup>st</sup>  
133 century is  $3.7^{\circ}\text{C}$  for the IPCC RCP8.5 baseline scenario [34]). Like other *Drosophila* species, the thermal  
134 performance curve of *Drosophila simulans* demonstrates a decrease in performance from temperatures  
135 above  $25^{\circ}\text{C}$  [35].

136 After 48 hours, one single naïve mated three to five-day-old female parasitoid was placed in each vial  
137 with *D. simulans* larvae. Twenty-four hours later, parasitoids were removed. This was repeated for all three  
138 parasitoid species, temperatures, and host densities. Controls without parasitoids were run at the same time  
139 to obtain the baseline for host survival without parasitism. Vials were checked daily for adult emergences  
140 until the last emergence (up to 41 days for the species with the longest developmental time). We waited  
141 five consecutive days without any emergence to stop collecting, thus avoiding a second generation. All  
142 emerged insects were collected, identified, sexed, and stored in 95% ethanol. Each treatment was replicated  
143 eight times across eight experimental blocks.

#### 144 *Experiment 2: Multiple parasitoids experiment*

145 To investigate the effect of warming on MPEs, we manipulated parasitoid assemblages and temperature in  
146 a fully factorial design (Figure 1b and c). We followed the same protocol described above for Experiment  
147 1, using 50 *D. simulans* eggs per vial with two female parasitoids either from the same (Figure 1b) or  
148 different species (Figure 1c). Each treatment was replicated eight times across two blocks.

#### 149 *Experiment 3: Mechanisms of MPEs*

150 In a follow up experiment, we conducted a subset of the treatments described for Experiments 1 and 2 with  
151 *Asobara sp.* and *Ganaspis sp.* We put 50 *D. simulans* eggs per vial with 10 mL of food media under ambient  
152 and warming temperatures and introduced one parasitoid, two parasitoids conspecific or the two parasitoids  
153 heterospecific, resulting in five different parasitoid assemblages. Instead of rearing the insects to adults, we  
154 dissected ten 3<sup>rd</sup> instar larvae or pupae per vial (Figure 1e). Each host larva was individually transferred

155 into a glass petri dish containing PBS and dissected under stereomicroscope. We recorded the number of  
156 parasitoid larvae and eggs of each species to assess super- and multiparasitism events, and, when possible,  
157 the number and identity of encapsulated parasitoids. Pictures of the eggs, larvae, and encapsulated  
158 parasitoids for each species observed during the experiment are presented in Supplemental Material S1.  
159 Each treatment was replicated ten times across two blocks. At the elevated temperature, six replicates were  
160 dissected two days after infection (early dissection time) and four three days after infection (late dissection  
161 time), and at the ambient temperature, four replicates were dissected three days after infection (early  
162 dissection time) and six four days after infection (late dissection time). Different times for dissection were  
163 chosen for each temperature to standardize parasitoid developmental stage, while still being able to identify  
164 all the parasitoids that have parasitized the host. At the early dissection time, *Asobara sp.* were already at  
165 the larval stage, whereas *Ganaspis sp.* were still eggs. At the late dissection time, *Ganaspis* larvae were  
166 also observed, and sometimes at the same time than *Asobara sp.* as larva within a same host.

#### 167 *Data analysis and modelling*

##### 168 *Experiment 1: Single-parasitoid experiment*

169 We combined numerical simulations of host density dynamics, accounting for host depletion [36]:

$$170 \quad \frac{dH}{dt} = -F(H)P,$$

171 with Bayesian parameter estimation using the *rstan* package (e.g. [37]).  $P = 1$  is the parasitoid density,  
172 and  $F(H)$  denotes the host density-dependent functional response. In the model fitting, Markov chain Monte  
173 Carlo was used to sample from the functional response's model parameters' posterior probability  
174 distribution  $p(\theta|H_{\text{sup}})$  given the observations  $H_{\text{sup}}$ , based on the likelihood function  $p(H_{\text{sup}}|\theta)$  and prior  
175 distributions  $p(\theta)$ , with  $\theta$  the free parameters.  $H_{\text{sup}}$  is the number of *D. simulans* suppressed (the difference  
176 between adult hosts emerging from the controls without parasitoids and from the experiment). In each  
177 iteration, numerical solutions of the equation were computed with the built-in *Runge-Kutta* ODE solver, to  
178 predict densities  $\hat{H}_1$  after 1 day for each given initial host density,  $H_0$ . The likelihood was evaluated



179 assuming a binomial distribution for observed numbers of suppressed hosts  $H_{\text{sup}}$  with  $n = H_0$  trials and  $p =$   
180  $\frac{H_0 - \hat{H}_1}{H_0}$  success probability. Vague priors were used for all model parameters.

181 We fitted three different functional response models (Type II, Type III and generalized Type III), and  
182 retained the Type II functional response [38] after model comparison (see Supplement Material S2). The  
183 equation for the instantaneous attack rate of a parasitoid is as follows:

$$184 \quad F(H) = \frac{aH}{1 + ahH}$$

185 where  $a$  is the attack rate, and  $h$  is the handling time. Type II functional responses are thought to  
186 characterize the attack rate of many types of predators and parasitoids [39]. Parameter estimates and the  
187 functional responses for each species at each temperature are presented in Supplement Material S2 (Table  
188 S1 and Figure S2).

#### 189 *Experiment 2: Multiple parasitoids experiment*

190 Host-parasitoid interaction strength was defined with the combination of Degree of Infestation (DI; i.e.,  
191 host suppression) and Successful Parasitism rate (SP; i.e., parasitoid performance). Observed degree of  
192 infestation ( $DI_{\text{obs}}$ ) and Successful parasitism rate ( $SP$ ) were measured as:

$$193 \quad DI_{\text{obs}} = 1 - \frac{H}{H_C} ; SP = \frac{P}{H_C - H}$$

194 where  $H$  is the number of adult hosts emerging from the experiment vial,  $H_C$  the mean number of adult  
195 hosts emerging from the controls without parasitoids, and  $P$  the number of parasitoid adults emerging from  
196 the experimental vial [40,41].  $DI_{\text{obs}}$  was set to zero if the number of hosts emerging from the treatment was  
197 greater than the controls. If no parasitoid emerged or if the number of hosts suppressed was estimated to be  
198 zero,  $SP$  was set to zero. If the number of parasitoids that emerged was greater than to the estimated number  
199 of hosts suppressed,  $SP$  was set to one. For treatments with single parasitoid species, we assumed that each

200 of the two parasitoid individuals were attacking the hosts equally, therefore the number of parasitoid adults  
201 emerging was divided by two to calculate individual successful parasitism rate.

202 Data were analyzed with generalized linear models (GLMs). Model assumptions were verified with the  
203 *DHARMA* package [42]. To correct for overdispersion of the residuals and zero inflation, data were modeled  
204 using zero-inflation models with a beta binomial error distribution and a logit function using the *glmmTMB*  
205 function from the *TMB* package [43]. Two categories of predictor variables were used in separate models  
206 with temperature treatment (two levels: ambient and warming): (i) parasitoid treatment (three levels; single  
207 parasitoid, two parasitoids conspecific, and two parasitoids heterospecific), and (ii) parasitoid species  
208 assemblage (nine levels). For DI, two-way interactions between temperature and either parasitoid treatment  
209 or parasitoid assemblage were always kept in our models for better comparison with predicted DI values  
210 (see section below). For SP, these two-way interactions were tested and kept in our models if judged to be  
211 significant based on backward model selection using Likelihood-ratio tests. Significance of the effects was  
212 tested using Wald type III analysis of deviance with Likelihood-ratio tests. Factor levels were compared  
213 using Tukey's HSD *post hoc* comparisons of all means, and the *emmeans* package [44]. Results for  
214 developmental rate are presented in Supplement Material S3 (Figure S3).

### 215 *Estimation of multiple parasitoid effects*

216 To predict the degree of infestation if parasitoids have independent effects on host suppression, we used  
217 the method develop by Mccoy *et al.* [26] which takes into account host depletion. This method uses the  
218 functional responses obtained from Experiment 1 in a population-dynamic model to predict how host  
219 density changes in time as a function of initial density and parasitoid combination for each temperature.  
220 We thus calculated the estimated Degree of Infestation ( $DI_0$ ) by integrating the aggregate attack rates over  
221 the duration of the experiment as host density declines. We first solved the equation

$$222 \quad \frac{dH}{dt} = - \sum_{i=1}^n \frac{a_i H_t P_i}{1 + a_i h_i H_t}$$

223 similar to the equation described for Experiment 1, but adapted to  $n$  parasitoids. Then we calculated the  
224 estimated Degree of Infestation as

$$225 \quad DI_0 = 1 - \frac{H_T}{H_0}$$

226 where  $H_0$  is the initial host density, and  $H_T$  is the estimated host population at the end of the experiment  
227 (time  $T = 1$  day). This methods allows a good estimate of  $DI_0$  for the null hypothesis that predators do not  
228 interact [27]. The lower and upper confidence intervals (CI) around the predicted values were estimated  
229 with a global sensitivity analysis based on the functional response parameters estimates to generate 100  
230 random parameter sets using a Latin hypercube sampling algorithm [45]. The expected degree of infestation  
231 was calculated for each parameter set using the *sensRange* function in the R package *FME*. The 2.5% and  
232 the 97.5% quantiles of the values obtained from these simulations were used as 95% CIs around the  
233 predictions.

234 Predictions from the population dynamic model were then compared with the observed values ( $DI_{obs}$ ).  
235 Estimated DI values greater than observed DI translate to risk reduction while estimates that were lower  
236 than observed DI reflects risk enhancement for the host with multiple parasitoids. We calculated the  
237 difference between  $DI_{obs}$  and mean  $DI_0$  for each treatment, and investigated the effects of temperature  
238 (ambient versus warmed), parasitoid diversity (one or two species), and their interaction if significant, using  
239 an analysis of variance (ANOVA) with the *aov* function. We statistically compared the observed and  
240 estimated DI for each temperature regime using a quasibinomial GLM with  $DI_0$  as an offset (i.e., predictor  
241 variable) following Sentis et al. (2017). A positive or negative significant intercept indicates that  $DI_0$  values  
242 underestimate or overestimate  $DI_{obs}$ , respectively.

### 243 *Experiment 3: MPEs mechanisms*

244 The frequency of super- and multiparasitism event was calculated out of the larvae parasitized per vial (total  
245 of 1,000 larvae dissected across 100 vials, out of which 868 were parasitized: presence of either one or both  
246 parasitoid species and/or trace of melanization). The frequency of encapsulated parasitoids was calculated

247 out of the total of parasitoids per larva. Effects of temperature and parasitoid assemblages on these  
248 frequencies were analyzed with generalized linear mixed models (GLMMs) with the method described for  
249 Experiment 2. All analyses were performed using R 4.0.2 [46].

## 250 **Results**

### 251 *Effects of multiple parasitoids on host suppression under warming*

252 The degree of infestation observed in the experiment varied from the model estimations (Figure 2).  
253 Temperature significantly affected these differences ( $F_{1,93} = 9.89$ ,  $P = 0.002$ ), but parasitoid diversity did  
254 not ( $F_{1,93} = 0.08$ ,  $P = 0.772$ ), implying that parasitoid density rather than their diversity is important for host  
255 suppression. The comparison of the estimated and observed DI revealed that, in most cases, there were no  
256 significant difference between predicted and observed DI at ambient temperature, implying neutral effects  
257 with multiple parasitoids (when looking at the intercept of the quasibinomial GLM with  $DI_{0\text{ as}}$  as an offset;  
258 value  $\pm$  SE:  $0.18 \pm 0.27$ , t value = 0.692, df = 942,  $P = 0.493$ ), whereas under warming the predicted  $DI_{0\text{ as}}$   
259 significantly underestimated the observed  $DI_{ob}$ , implying risk enhancement for the host (value  $\pm$  SE:  $0.44$   
260  $\pm 0.20$ , t value = 2.139, df = 798,  $P = 0.038$ ; Figure 2).

### 261 *Effects of warming and parasitoid assemblages on the observed degree of infestation*

262 Contrary to the effects of multiple parasitoids on host suppression, the observed degree of infestation  $DI_{obs}$   
263 was not significantly affected by temperature ( $\chi^2_{(1)} = 1.17$ ,  $P = 0.279$ ), or parasitoid treatment (single, two  
264 conspecific or two heterospecific parasitoid assemblages:  $\chi^2_{(2)} = 4.34$ ,  $P = 0.114$ ) due to species-specific  
265 effects. DI only varied with parasitoid species assemblages ( $\chi^2_{(8)} = 258.92$ ,  $P < 0.0001$ ). DI was the highest  
266 in assemblages with *Ganaspis sp.*, either alone, with a conspecific, or another parasitoid species (Figure  
267 S4). The interaction between temperature and parasitoid assemblages had no significant effect on  $DI_{obs}$   
268 ( $\chi^2_{(1)} = 3.42$ ,  $P = 0.166$ ), despite some observed variation (Figure S4).

269 *Effect of warming and parasitoid assemblages on parasitoid performance*

270 Despite having no effect on DI, parasitoid treatment (single, two conspecific or two heterospecific  
271 parasitoid assemblages) significantly affected successful parasitism rate, and the effect varied among  
272 parasitoid species (two-way interaction:  $\chi^2_{(4)} = 16.88$ ,  $P = 0.002$ ; Table 1). SP of *Ganaspis sp.* decreased  
273 by 95.7% (95% CI: 93.6 - 97.8%) with the presence of a parasitoid conspecific [*Post hoc* Odds Ratio (OR)  
274 = 0.043,  $P < 0.0001$ ], and by 83.4% (CI: 75.4 - 91.3%) with the presence of a parasitoid heterospecific  
275 compared to when alone (OR = 0.166,  $P < 0.001$ ). However, it increased by 287.6% (CI: 178.8 - 396.4%)  
276 when the parasitoid competitor was from another species compared to a conspecific (OR = 3.876,  $P <$   
277 0.0001). SP of *Asobara sp.* decreased by 55.2% (CI: 41.5 - 69.7%) when a parasitoid conspecific was  
278 present compared to when alone (OR = 0.448,  $P = 0.036$ ), but was not significantly affected by the presence  
279 of a parasitoid heterospecific (OR = 0.712,  $P = 0.484$ ). There were no significant effects of parasitoid  
280 treatments for SP of *Leptopilina sp.* Effects of parasitoid assemblages on SP also varied between parasitoid  
281 species and are presented in Supplementary Material S5 (Table S2 and Figure S5).

282 Effects of temperature on SP also depended on the species (two-way interaction:  $\chi^2_{(2)} = 7.31$ ,  $P = 0.026$ ).  
283 Only *Ganaspis sp.* was significantly affected by temperature, and its SP decreased by 58.8% (CI: 69.8 -  
284 47.8%) with warming (OR = 0.412,  $\chi^2_{(1)} = 10.17$ ,  $P = 0.001$ ). However, all species developed faster under  
285 warming (Figure S3).

286 *Mechanisms of MPEs*

287 The frequency of either super- or multiparasitism events, reflecting strength of intrinsic competition among  
288 parasitoids, was significantly affected by parasitoid assemblages ( $\chi^2_{(4)} = 572.40$ ,  $P < 0.0001$ ), temperature  
289 ( $\chi^2_{(1)} = 4.49$ ,  $P = 0.034$ ), and the interaction between parasitoid assemblages and temperature  $\chi^2_{(4)} = 36.04$ ,  
290  $P < 0.0001$ ; Figure 3). Superparasitism rate increased by 239% (CI: 230-308%) when *Ganaspis sp.* was  
291 with a conspecific (OR = 3.69,  $P < 0.0001$ ), and by 581% (CI: 411-751%) when *Asobara sp.* was with a  
292 conspecific (OR = 6.81,  $P < 0.0001$ ) compared to when they were alone, but without significant differences  
293 between temperature treatments. In the parasitoids heterospecific treatments, warming significantly

294 increased frequency of super- and multiparasitism events by 173% (CI: 130-216%; OR = 2.73,  $P < 0.0001$ ),  
295 indicating an increase in intrinsic competition among parasitoids with warming.

296 The frequency of encapsulated parasitoids differed between parasitoid species, but not between  
297 treatments (results presented in Supplement Material S6), indicating that host immune response did not  
298 change depending on the treatments.

## 299 **Discussion**

300 The key result from our study is the synergistic effects of multiple predators for top-down control at elevated  
301 temperature across predator assemblages. However, parasitoid performance often decreased when multiple  
302 parasitoids were present due to intrinsic competition among parasitoids, potentially limiting the long-term  
303 benefits for ecosystem functioning.

### 304 *Warming increases the effects of multiple predators on risk of predation*

305 Our results showed that warming led to a higher top-down control than expected with multiple predators.  
306 Indeed, our mathematical model underestimated trophic interaction strength measured in multiple-  
307 predators' treatments at elevated temperature. Our results are in concordance with previous studies on  
308 diverse systems on the importance of considering non-trophic interactions to predict the effect of multiple  
309 predators on top-down control under global changes. Drieu et al. [47] found that predator diversity enhanced  
310 the biological control of insect pests in vineyards under warming due to functional complementarity among  
311 predator species, while effects were substitutive at ambient temperature. Cuthbert et al. [11] also found an  
312 effect of temperature on intraspecific multiple predator effects on an invasive Gammaridae species; but  
313 effects contrasted ours: risk enhancement at low temperature and risk reduction with warming. Sentis et al.  
314 [10] found a general trend of predation risk reduction for the prey with multiple predators in an aquatic food  
315 web, but without any effect of temperature on those emergent MPEs. Our study goes further by showing  
316 the important impact of warming on the effects of multiple predators on prey suppression across multiple  
317 assemblages of conspecifics and heterospecifics. In addition to an increase in prey suppression with  
318 multiple predators under warming in terrestrial ecosystems, a diverse predator community also increases

319 the chances of complementarity in face of environmental variation and disturbance [48]. Indeed, presence  
320 of multiple predator species could mitigate negative effects of warming on top-down control due to resource  
321 partitioning and/or functional redundancy [47,49,50]. Preserving predator biodiversity should therefore be  
322 generally beneficial for top-down control under climate change.

### 323 *Mechanisms behind emergent multiple predator effects on the prey*

324 Because of the synergistic effects of multiple parasitoids on host suppression under warming found in our  
325 study, we could have hypothesized that warming weaken interference between parasitoids, similarly to  
326 predator-prey systems [51]. However, our host-parasitoid system allowed us to investigate further the  
327 potential mechanisms behind our results, especially the strength of intrinsic competitive interactions  
328 between parasitoids (i.e., frequency of super- and multiparasitism event). We found generally higher  
329 intrinsic competition in multiple parasitoid treatments compared to single parasitoid treatments, and higher  
330 intrinsic competition under warming when the two species were present compared to ambient temperature.  
331 When super- or multi-parasitized, the host was less likely to survive, possibly because its immune response  
332 was less likely to overcome multiple parasitoids. Therefore, the higher top-down control observed under  
333 warming with multiple parasitoids was due to a higher parasitism pressure, and not because of weaker  
334 interactions between parasitoids.

335 Here, the experiments were conducted in simplified laboratory conditions where parasitoids were forced  
336 to share the same habitat (a vial) and overlapped in time (24 hours), which does not allow for resource  
337 partitioning [52]. This might have enhanced rate of super- and multi-parasitism events, and thus top-down  
338 control. In nature, warming could also change predator habitat use [8,9], and phenology [53,54], leading to  
339 changes in MPEs. However, the impact of temperature on MPEs was consistent across parasitoid  
340 assemblages, suggesting a general pattern for synergistic effects with multiple natural enemies under  
341 warming in our system.

342 *Parasitoid performance was not affected by temperature, but by parasitoid assemblage*

343 Despite multiple parasitoids enhancing host suppression under warming, successful parasitism rate was  
344 often lower at both temperatures when another parasitoid individual was present, probably due to the strong  
345 intrinsic competitive interactions observed through dissections. A decrease in parasitoid performance would  
346 potentially limit the synergistic effects of multiple parasitoids for host suppression in the long term.  
347 Similarly, another study on *Drosophila*-parasitoid interactions observed a significant impact of thermal  
348 regime on parasitoid success, but still without changes in observed degree of infestation [55]. Long-term  
349 effects of warming on parasitoid populations are thus uncertain, and hosts from the next generation might  
350 benefit from lower parasitoid abundances due to lower rate of successful parasitism.

351 *Similar effects of intra- versus interspecific multiple parasitoids on top-down control*

352 Similar to other studies, we did not find significant differences between treatments with multiple  
353 conspecifics or heterospecific predators for prey suppression [56–58]. It is therefore important to look at  
354 effects of both predator diversity and density on prey suppression, rather than only using a substitutive  
355 approach (i.e., keeping predator density constant [52]), which might confound the results. When niche  
356 differentiation is allowed, for example with habitat heterogeneity or longer timeframe that include potential  
357 differences in phenology, increase in predator diversity should intensify prey suppression because of  
358 functional diversity rather than because of diversity *per se* [58–60]. Here, two predators of a same species  
359 rather than a single predator intensified prey suppression at warmer temperature despite the small scale of  
360 the experiment. Allowing for differentiation in habitat domain between predator species might have yielded  
361 higher prey suppression in treatments with heterospecifics, and lower rate of multiparasitism. Given the  
362 likely ubiquity of resource partitioning in nature [61], preserving predator biodiversity would be the best  
363 strategy to maintain top-down control.

364 *No effects of treatments on observed degree of infestation*

365 Prey suppression was generally higher when predator assemblages included the best-performing species,  
366 *Ganaspis sp.*, no matter the predator treatment, nor the temperature. A meta-analysis on the effects of



367 predator diversity on prey suppression found a similar trend across the 46 studies taken into account [62],  
368 but also found a general positive effect of multiple predators on top-down control. Contrastingly, a meta-  
369 analysis of 108 biological control projects found no relationship between the number of agents released and  
370 biological control success for insect pests [63]. However, increasing predator diversity should be generally  
371 beneficial for top-down control by increasing the chances to have a more effective natural enemy species  
372 in the community, as it was the case in our study (i.e., sampling effect model [64]). Moreover, presence of  
373 multiple species in the community could buffer any mismatch between predator and prey species induced  
374 by warming [65]. *Ganaspis sp.* was the best performing species for suppression of *D. simulans* across  
375 treatments, but its performance decreased with warming, suggesting that parasitism rate, and therefore host  
376 suppression, could also decreased in the longer-term due to a decrease in parasitoid population.

### 377 *Conclusion*

378 Overall, pairwise interaction strength generally failed to accurately estimate the trophic interaction strength  
379 observed, indicating that non-trophic interactions must be considered to predict the effects of multiple  
380 predators on prey suppression, and in food web studies in general [66]. Previous studies show altered MPEs  
381 with warming due to changes in resource partitioning [8,11], but our study is the first, to our knowledge, to  
382 show sign of direct effects of warming on predator interactions across predator assemblages, resulting in a  
383 higher top-down control with multiple predators at elevated temperature.

### 384 **Acknowledgements**

385 We thank Anna Mácová, Andrea Weberova, Grégoire Proudhom, and Joel Brown for their help during the  
386 setup of the experiments, and Tereza Holicová and Vincent Montbel for their help dissecting the larvae.  
387 The drawings used for Figure 1 was made by Tereza Holicová. We acknowledge funding support from the  
388 Czech Science Foundation grant no. 20-30690S. BR acknowledges the support of iDiv funded by the  
389 German Research Foundation (DFG–FZT 118, 202548816).

390 **References**

- 391 1. Song C, Von Ahn S, Rohr RP, Saavedra S. 2020 Towards a probabilistic understanding about the  
392 context-dependency of species interactions. *Trends Ecol. Evol.* **35**, 384–396.  
393 (doi:10.1016/j.tree.2019.12.011)
- 394 2. Davis AJ, Lawton JH, Shorrocks B, Jenkinson LS. 1998 Individualistic species responses invalidate  
395 simple physiological models of community dynamics under global environmental change. *J. Anim.*  
396 *Ecol.* **67**, 600–612. (doi:10.1046/j.1365-2656.1998.00223.x)
- 397 3. Rall BÖC, Vucic-Pestic O, Ehnes RB, Emmerson M, Brose U. 2010 Temperature, predator-prey  
398 interaction strength and population stability. *Glob. Chang. Biol.* **16**, 2145–2157.  
399 (doi:10.1111/j.1365-2486.2009.02124.x)
- 400 4. Parmesan C. 2006 Ecological and evolutionary responses to recent climate change. *Annu. Rev. Ecol.*  
401 *Evol. Syst.* **37**, 637–669. (doi:10.1146/annurev.ecolsys.37.091305.110100)
- 402 5. Thierry M, Hrčėk J, Lewis OT. 2019 Mechanisms structuring host–parasitoid networks in a global  
403 warming context: a review. *Ecol. Entomol.* , een.12750. (doi:10.1111/een.12750)
- 404 6. Hance T, Baaren J van, Vernon P, Boivin G. 2007 Impact of extreme temperatures on parasitoids in  
405 a climate change perspective. *Annu. Rev. Entomol.* **52**, 107–126.  
406 (doi:10.1146/annurev.ento.52.110405.091333)
- 407 7. Uszko W, Diehl S, Englund G, Amarasekare P. 2017 Effects of warming on predator–prey  
408 interactions – a resource-based approach and a theoretical synthesis. *Ecol. Lett.* **20**, 513–523.  
409 (doi:10.1111/ele.12755)
- 410 8. Barton BT, Schmitz OJ. 2009 Experimental warming transforms multiple predator effects in a  
411 grassland food web. *Ecol. Lett.* **12**, 1317–1325. (doi:10.1111/j.1461-0248.2009.01386.x)
- 412 9. Schmitz OJ, Barton BT. 2014 Climate change effects on behavioral and physiological ecology of  
413 predator-prey interactions: Implications for conservation biological control. *Biol. Control* **75**, 87–  
414 96. (doi:10.1016/j.biocontrol.2013.10.001)
- 415 10. Sentis A, Gémard C, Jaugeon B, Boukal DS. 2017 Predator diversity and environmental change

- 416 modify the strengths of trophic and nontrophic interactions. *Glob. Chang. Biol.* **23**, 2629–2640.  
417 (doi:10.1111/gcb.13560)
- 418 11. Cuthbert RN, Wasserman RJ, Dalu T, Briski E. 2021 Warming mediates intraspecific multiple  
419 predator effects from an invasive crustacean. *Mar. Biol.* **168**, 35. (doi:10.1007/s00227-021-03840-  
420 z)
- 421 12. Schmitz OJ. 2007 Predator diversity and trophic interactions. *Ecology* **88**, 2415–2426.  
422 (doi:10.1890/06-0937.1)
- 423 13. Sih A, Englund G, Wooster D. 1998 Emergent impacts of multiple predators on prey. *Trends Ecol.*  
424 *Evol.* **13**, 350–355. (doi:10.1016/S0169-5347(98)01437-2)
- 425 14. Resetarits WJ, Bohenek JR, Pintar MR. 2021 Predator-specific responses and emergent multi-  
426 predator effects on oviposition site choice in grey treefrogs, *Hyla chrysoscelis*. *Proc. R. Soc. B Biol.*  
427 *Sci.* **288**. (doi:10.1098/rspb.2021.0558)
- 428 15. Schmitz OJ. 2009 Effects of predator functional diversity on grassland ecosystem function. *Ecology*  
429 **90**, 2339–2345. (doi:10.1890/08-1919.1)
- 430 16. Laubmeier AN, Rebarber R, Tenhumberg B. 2020 Towards understanding factors influencing the  
431 benefit of diversity in predator communities for prey suppression. *Ecosphere* **11**, e03271.  
432 (doi:10.1002/ecs2.3271)
- 433 17. Soluk DA. 1993 Multiple predator effects: predicting combined functional response of stream fish  
434 and invertebrate predators. *Ecology* **74**, 219–225. (doi:10.2307/1939516)
- 435 18. Tylianakis JM, Romo CM. 2010 Natural enemy diversity and biological control: making sense of  
436 the context-dependency. *Basic Appl. Ecol.* **11**, 657–668. (doi:10.1016/j.baae.2010.08.005)
- 437 19. Thierry M, Pardikes NA, Lue CH, Lewis OT, Hrček J. 2021 Experimental warming influences  
438 species abundances in a *Drosophila* host community through direct effects on species performance  
439 rather than altered competition and parasitism. *PLoS One* **16**, e0245029.  
440 (doi:10.1371/journal.pone.0245029)
- 441 20. Kéfi S, Berlow EL, Wieters EA, Joppa LN, Wood SA, Brose U, Navarrete SA. 2015 Network

- 442 structure beyond food webs: Mapping non-trophic and trophic interactions on Chilean rocky shores.  
443 *Ecology* **96**, 291–303. (doi:10.1890/13-1424.1)
- 444 21. Wootton JT. 1997 Estimates and tests of per capita interaction strength: Diet, abundance, and impact  
445 of intertidally foraging birds. *Ecol. Monogr.* **67**, 45–64. (doi:10.1890/0012-  
446 9615(1997)067[0045:EATOPC]2.0.CO;2)
- 447 22. Thierry M, Pardikes NA, Ximénez-Embún MG, Proudhom G, Hrček J. 2021 Multiple parasitoid  
448 species enhance top-down control, but parasitoid performance is context-dependent. *bioRxiv* ,  
449 2021.07.16.452484. (doi:10.1101/2021.07.16.452484)
- 450 23. Godfray HCJ. 2013 Parasitoids. In *Encyclopedia of Biodiversity: Second Edition*, pp. 674–682.  
451 (doi:10.1016/B978-0-12-384719-5.00152-0)
- 452 24. Carton Y, Poirié M, Nappi AJ. 2008 Insect immune resistance to parasitoids. *Insect Sci.* **15**, 67–87.  
453 (doi:10.1111/j.1744-7917.2008.00188.x)
- 454 25. Harvey JA, Poelman EH, Tanaka T. 2013 Intrinsic inter- and intraspecific competition in parasitoid  
455 wasps. *Annu. Rev. Entomol.* **58**, 333–351. (doi:10.1146/annurev-ento-120811-153622)
- 456 26. McCoy MW, Stier AC, Osenberg CW. 2012 Emergent effects of multiple predators on prey survival:  
457 The importance of depletion and the functional response. *Ecol. Lett.* **15**, 1449–1456.  
458 (doi:10.1111/ele.12005)
- 459 27. Sentis A, Boukal DS. 2018 On the use of functional responses to quantify emergent multiple  
460 predator effects. *Sci. Rep.* **8**, 1–12. (doi:10.1038/s41598-018-30244-9)
- 461 28. Jeffs CT *et al.* 2021 Molecular analyses reveal consistent food web structure with elevation in  
462 rainforest *Drosophila* - parasitoid communities. *Ecography (Cop.)*. **44**, 403–413.  
463 (doi:10.1111/ecog.05390)
- 464 29. Deutsch CA, Tewksbury JJ, Huey RB, Sheldon KS, Ghalambor CK, Haak DC, Martin PR. 2008  
465 Impacts of climate warming on terrestrial ectotherms across latitude. *Proc. Natl. Acad. Sci. U. S. A.*  
466 **105**, 6668–6672. (doi:10.1073/pnas.0709472105)
- 467 30. Kellermann V, Overgaard J, Hoffmann AA, Fløjgaard C, Svenning J-C, Loeschcke V. 2012 Upper

- 468 thermal limits of *Drosophila* are linked to species distributions and strongly constrained  
469 phylogenetically. *Proc. Natl. Acad. Sci.* **109**, 16228–16233. (doi:10.1073/pnas.1207553109)
- 470 31. Overgaard J, Kearney MR, Hoffmann AA. 2014 Sensitivity to thermal extremes in Australian  
471 *Drosophila* implies similar impacts of climate change on the distribution of widespread and tropical  
472 species. *Glob. Chang. Biol.* **20**, 1738–1750. (doi:10.1111/gcb.12521)
- 473 32. Lue C-H *et al.* 2021 DROP: Molecular voucher database for identification of *Drosophila*  
474 parasitoids. *Mol. Ecol. Resour.* (doi:10.1111/1755-0998.13435)
- 475 33. Nouhaud P, Mallard F, Poupardin R, Barghi N, Schlötterer C. 2018 High-throughput fecundity  
476 measurements in *Drosophila*. *Sci. Rep.* **8**, 4469. (doi:10.1038/s41598-018-22777-w)
- 477 34. Pachauri RK, Meyer L, Hallegatte France S, Bank W, Hegerl G, Brinkman S, van Kesteren L,  
478 Leprince-Ringuet N, van Boxmeer F. 2014 *IPCC, 2014: Climate Change 2014: Synthesis Report. Contribution of Working Groups I, II and III to the Fifth Assessment Report of the Intergovernmental Panel on Climate Change e [Core Writing Team, R.K. Pachauri and L.A. Meyer (eds.)]*. IPCC, Geneva, Switzerland. See <http://www.ipcc.ch>.
- 482 35. MacLean HJ, Sørensen JG, Kristensen TN, Loeschcke V, Beedholm K, Kellermann V, Overgaard  
483 J. 2019 Evolution and plasticity of thermal performance: An analysis of variation in thermal  
484 tolerance and fitness in 22 *Drosophila* species. *Philos. Trans. R. Soc. B Biol. Sci.* **374**, 20180548.  
485 (doi:10.1098/rstb.2018.0548)
- 486 36. Rosenbaum B, Rall BC. 2018 Fitting functional responses: Direct parameter estimation by  
487 simulating differential equations. *Methods Ecol. Evol.* **9**, 2076–2090. (doi:10.1111/2041-  
488 210X.13039)
- 489 37. Sohlström EH, Archer LC, Gallo B, Jochum M, Kordas RL, Rall BC, Rosenbaum B, O’Gorman EJ.  
490 2021 Thermal acclimation increases the stability of a predator-prey interaction in warmer  
491 environments. *Glob. Chang. Biol.* , gcb.15715. (doi:10.1111/gcb.15715)
- 492 38. Holling CS. 1959 Some characteristics of simple types of predation and parasitism. *Can. Entomol.*  
493 **91**, 385–398.

- 494 39. Fernández-Arhex V, Corley JC. 2003 The functional response of parasitoids and its implications for  
495 biological control. *Biocontrol Sci. Technol.* **13**, 403–413. (doi:10.1080/0958315031000104523)
- 496 40. Carton Y, Kitano H. 1981 Evolutionary relationships to parasitism by seven species of the  
497 *Drosophila melanogaster* subgroup. *Biol. J. Linn. Soc.* **16**, 227–241. (doi:10.1111/j.1095-  
498 8312.1981.tb01849.x)
- 499 41. Boulétreau M, Wajnberg E. 1986 Comparative responses of two sympatric parasitoid cynipids to  
500 the genetic and epigenetic variations of the larvae of their host, *Drosophila melanogaster*. *Entomol.*  
501 *Exp. Appl.* **41**, 107–114. (doi:10.1111/j.1570-7458.1986.tb00516.x)
- 502 42. Hartig F. 2019 DHARMA: Residual Diagnostics for Hierarchical (Multi-Level / Mixed) Regression  
503 Models.
- 504 43. Lüdtke D, Makowski D, Waggoner P. 2019 *Performance: Assessment of regression models*  
505 *performance*. See <https://cran.r-project.org/package=performance>.
- 506 44. Lenth R V. 2018 Emmeans: Estimated marginal means, aka least-squares means. *R Packag. version*
- 507 45. Soetaert K, Petzoldt T. 2010 Inverse modelling, sensitivity and monte carlo analysis in R using  
508 package FME. *J. Stat. Softw.* **33**, 1–28. (doi:10.18637/jss.v033.i03)
- 509 46. Team RC. 2017 R: The R Project for statistical computing.
- 510 47. Drieu R, Rusch A. 2017 Conserving species-rich predator assemblages strengthens natural pest  
511 control in a climate warming context. *Agric. For. Entomol.* **19**, 52–59. (doi:10.1111/afe.12180)
- 512 48. Macfadyen S, Craze PG, Polaszek A, van Achterberg K, Memmott J. 2011 Parasitoid diversity  
513 reduces the variability in pest control services across time on farms. *Proc. R. Soc. B Biol. Sci.* **278**,  
514 3387–3394. (doi:10.1098/rspb.2010.2673)
- 515 49. Cebolla R, Urbaneja A, Baaren J van, Tena A. 2018 Negative effect of global warming on biological  
516 control is mitigated by direct competition between sympatric parasitoids. *Biol. Control* **122**, 60–66.  
517 (doi:10.1016/j.biocontrol.2018.04.006)
- 518 50. Pepi A, McMunn M. 2021 Predator diversity and thermal niche complementarity attenuate indirect  
519 effects of warming on prey survival. *Am. Nat.* (doi:10.1086/714590)

- 520 51. Lang B, Rall BC, Brose U. 2012 Warming effects on consumption and intraspecific interference  
521 competition depend on predator metabolism. *J. Anim. Ecol.* **81**, 516–523. (doi:10.1111/j.1365-  
522 2656.2011.01931.x)
- 523 52. Ives AR, Cardinale BJ, Snyder WE. 2005 A synthesis of subdisciplines: Predator-prey interactions,  
524 and biodiversity and ecosystem functioning. *Ecol. Lett.* **8**, 102–116. (doi:10.1111/j.1461-  
525 0248.2004.00698.x)
- 526 53. Abarca M, Spahn R. 2021 Direct and indirect effects of altered temperature regimes and  
527 phenological mismatches on insect populations. *Curr. Opin. Insect Sci.*  
528 (doi:10.1016/j.cois.2021.04.008)
- 529 54. Renner SS, Zohner CM. 2018 Climate change and phenological mismatch in trophic interactions  
530 among plants, insects, and vertebrates. *Annu. Rev. Ecol. Evol. Syst.* **49**, 165–182.  
531 (doi:10.1146/annurev-ecolsys-110617-062535)
- 532 55. Delava E, Fleury F, Gibert P. 2016 Effects of daily fluctuating temperatures on the *Drosophila*-  
533 *Leptopilina boulandi* parasitoid association. *J. Therm. Biol.* **60**, 95–102.  
534 (doi:10.1016/j.jtherbio.2016.06.012)
- 535 56. Lampropoulos PD, Perdikis DC, Fantinou AA. 2013 Are multiple predator effects directed by prey  
536 availability? *Basic Appl. Ecol.* **14**, 605–613. (doi:10.1016/j.baae.2013.08.004)
- 537 57. Griffin JN, Toscano BJ, Griffen BD, Silliman BR. 2015 Does relative abundance modify multiple  
538 predator effects? *Basic Appl. Ecol.* **16**, 641–651. (doi:10.1016/j.baae.2015.05.003)
- 539 58. Finke DL, Snyder WE. 2008 Niche partitioning increases resource exploitation by diverse  
540 communities. *Science (80-. )*. **321**, 1488–1490. (doi:10.1126/science.1160854)
- 541 59. Krey KL *et al.* 2021 Prey and predator biodiversity mediate aphid consumption by generalists. *Biol.*  
542 *Control* **160**, 104650. (doi:10.1016/j.biocontrol.2021.104650)
- 543 60. Greenop A, Woodcock BA, Wilby A, Cook SM, Pywell RF. 2018 Functional diversity positively  
544 affects prey suppression by invertebrate predators: a meta-analysis. *Ecology* **99**, 1771–1782.  
545 (doi:10.1002/ecy.2378)

- 546 61. Chesson P. 1991 A need for niches? *Trends Ecol. Evol.* **6**, 26–28. (doi:10.1016/0169-  
547 5347(91)90144-M)
- 548 62. Griffin JN, Byrnes JEK, Cardinale BJ. 2013 Effects of predator richness on prey suppression: A  
549 meta-analysis. *Ecology* **94**, 2180–2187. (doi:10.1890/13-0179.1)
- 550 63. Denoth M, Frid L, Myers JH. 2002 Multiple agents in biological control: Improving the odds? *Biol.*  
551 *Control* **24**, 20–30. (doi:10.1016/S1049-9644(02)00002-6)
- 552 64. Myers JH, Higgins C, Kovacs E. 1989 How many insect species are necessary for the biological  
553 control of insects? *Environ. Entomol.* **18**, 541–547. (doi:10.1093/ee/18.4.541)
- 554 65. Pardikes N, Revilla T, Lue C-H, Thierry Mélanie, Soutos-Villaros D, Hrcek J. 2021 Community  
555 context modifies response of host-parasitoid interactions to phenological mismatch under warming.  
556 *Authorea* (doi:10.22541/au.162454818.82806593/v1)
- 557 66. Kéfi S *et al.* 2012 More than a meal... integrating non-feeding interactions into food webs. *Ecol.*  
558 *Lett.* **15**, 291–300. (doi:10.1111/j.1461-0248.2011.01732.x)
- 559



560 **Table 1.** Odds ratios of a successful parasitism event between parasitoid treatments (single parasitoid, two  
561 parasitoids conspecific, and two parasitoids heterospecific) for each parasitoid species. Results are averaged  
562 over both temperatures because there was no significant interaction between temperature and parasitoid  
563 treatments. Values less than or greater than one denote a decrease or an increase in the odds of successful  
564 parasitism, respectively. Significant differences are highlighted in bold.

| Parasitoid species     | Contrast                     | Odds Ratio   | P-value           |
|------------------------|------------------------------|--------------|-------------------|
| <i>Ganaspis sp.</i>    | 2 conspecifics/single        | <b>0.043</b> | <b>&lt;0.0001</b> |
|                        | 2 heterospecifics/single     | <b>0.166</b> | <b>0.0007</b>     |
|                        | heterospecifics/conspecifics | <b>3.876</b> | <b>&lt;0.0001</b> |
| <i>Asobara sp.</i>     | 2 conspecifics/single        | <b>0.448</b> | <b>0.036</b>      |
|                        | 2 heterospecifics/single     | 0.711        | 0.484             |
|                        | heterospecifics/conspecifics | 1.589        | 0.251             |
| <i>Leptopilina sp.</i> | 2 conspecifics/single        | 0.182        | 0.494             |
|                        | 2 heterospecifics/single     | 0.871        | 0.994             |
|                        | heterospecifics/conspecifics | 4.764        | 0.295             |

565

566 **Figure legends**

567

568 **Figure 1.** Schematic representation of the experimental design. (a) One single parasitoid female with either  
569 5, 10, 25, 50 or 100 *D. simulans* per 10 mL of media, (b) two parasitoids conspecific or (c) two parasitoids  
570 heterospecific with 50 *D. simulans* per 10 mL of media. (d) Rearing until adults emerge for Experiments 1  
571 and 2 (up to 41 days), or (e) dissection of 10 3<sup>rd</sup> instar larvae or pupae per vial two, three or four days after  
572 infection for Experiment 3.

573

574 **Figure 2.** Differences between observed and estimated degree of infestation (DI) for each parasitoid  
575 assemblage and temperature. Negative values translate to risk reduction while positive values reflect risk  
576 enhancement for the host with multiple parasitoids. Light grey panel: two parasitoids conspecific, darker  
577 grey panel; two parasitoids heterospecific. Parasitoid abbreviations: A: *Asobara sp.*, L: *Leptopilina sp.*, and  
578 G: *Ganaspis sp.* Big dots represent the means ( $\pm$ SE), and small dots represent raw data.

579

580 **Figure 3.** Frequency of super- or multiparasitism events out of the total of parasitized hosts per vial  
581 significantly changed depending on parasitoid assemblage and temperature regime, indicating changes in  
582 intrinsic competitive interaction strength among parasitoids. Within each plot, different small letters denote  
583 significant differences between parasitoid assemblages (and temperature regime if significant). White  
584 panel: single parasitoid, light grey panel: two parasitoids conspecific, darker grey panel; two parasitoids  
585 heterospecific. Parasitoid abbreviations: A: *Asobara sp.*, and G: *Ganaspis sp.* Big dots represent the  
586 estimated means ( $\pm$ 95% CIs) and small dots represent raw data.

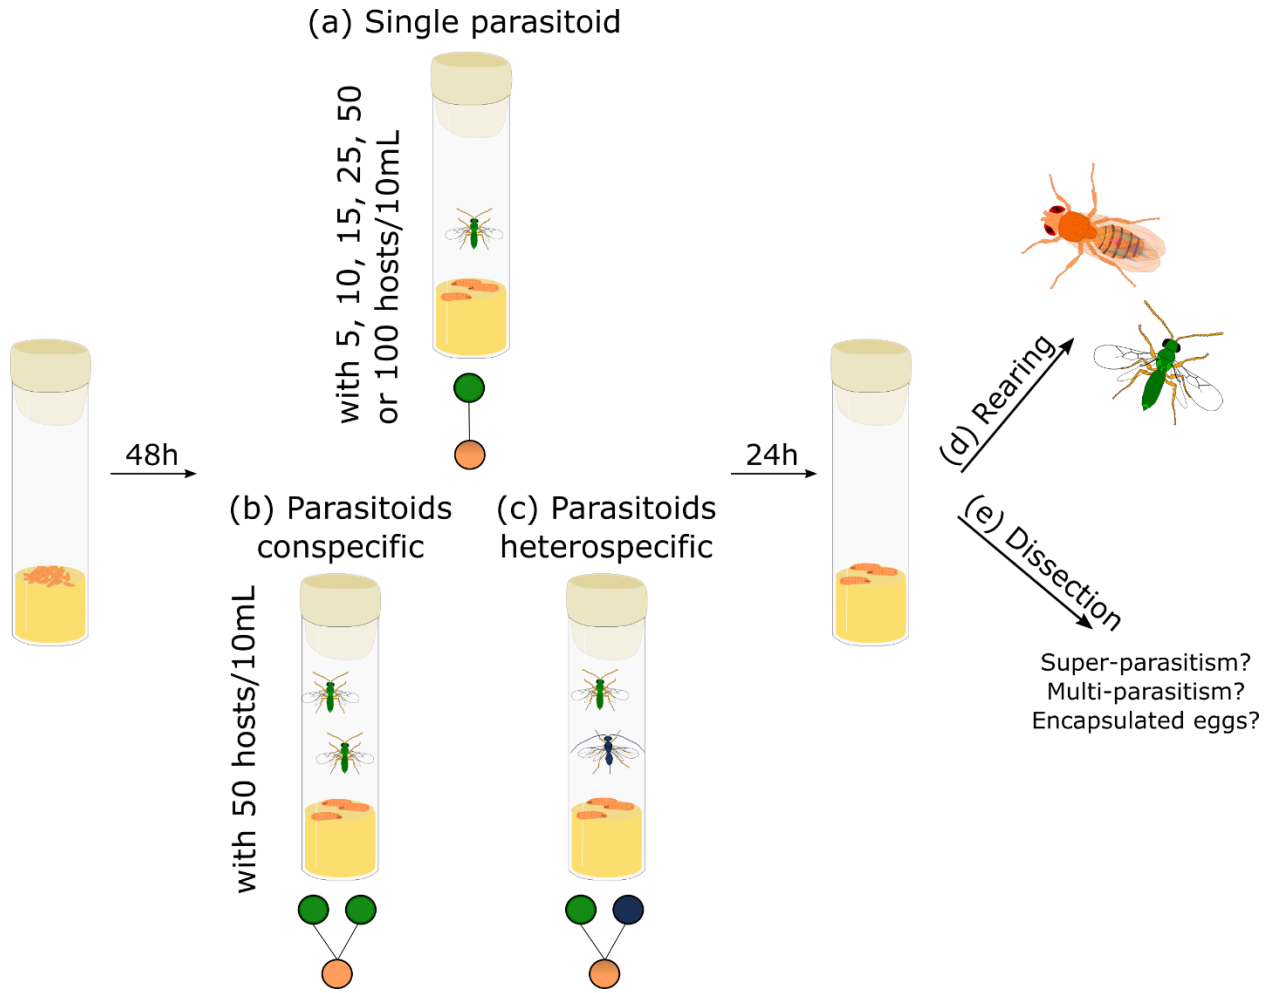

587

588 **Figure 1.**

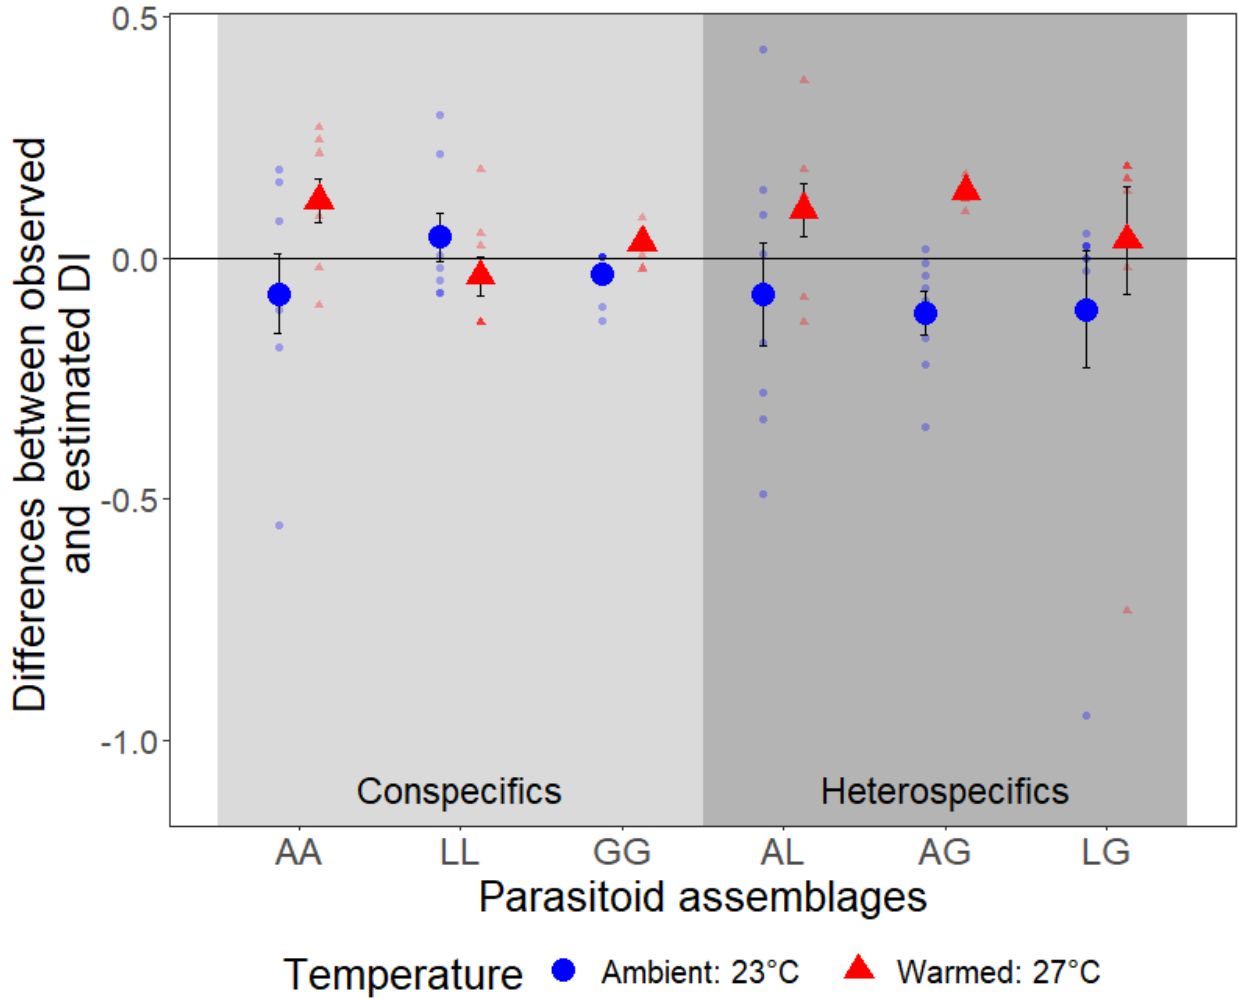

589

590 **Figure 2.**

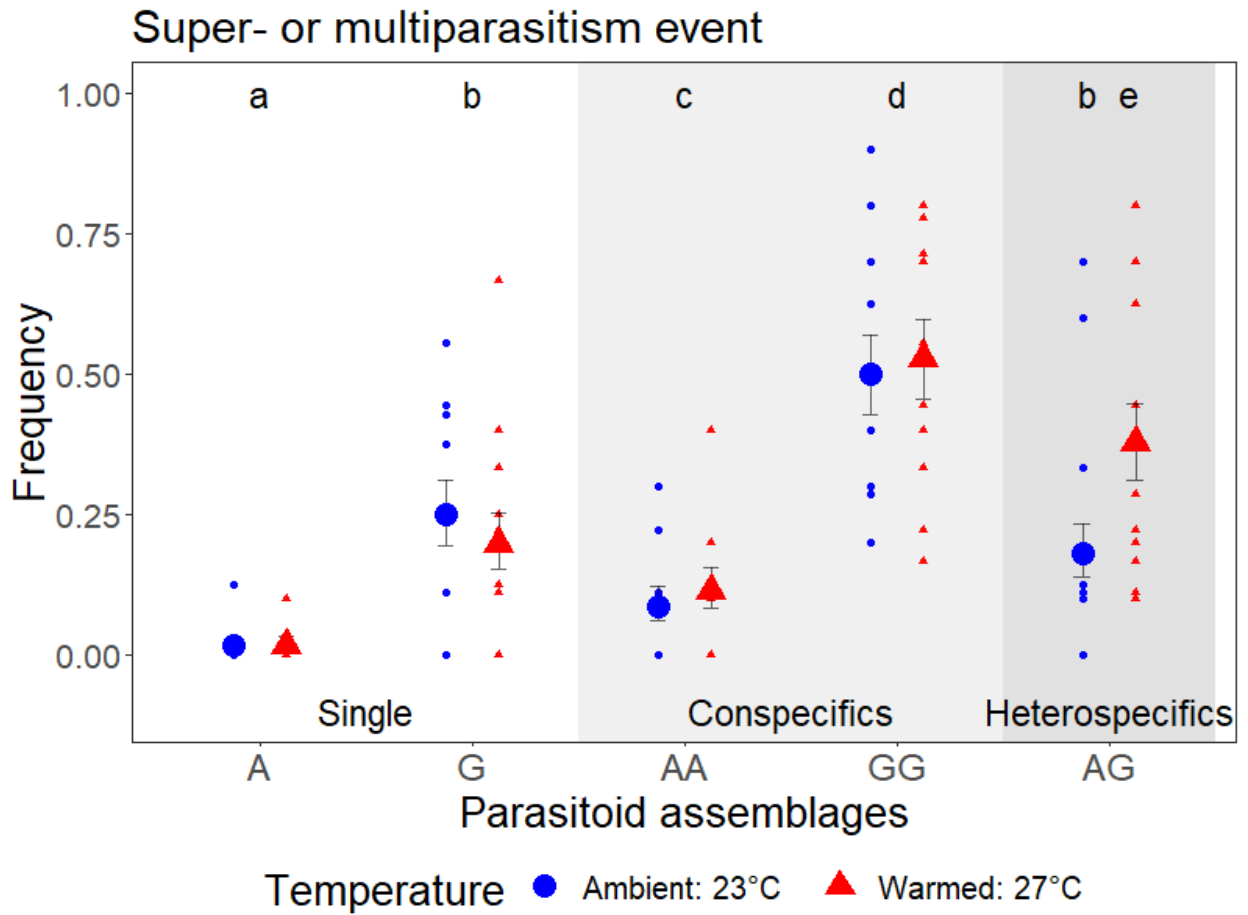

591

592 **Figure 3.**
