1 Presence of multiple parasitoids decreases host survival under warming,  
2 but parasitoid performance also decreases

3 **Mélanie Thierry**<sup>\*1,2</sup>, **Nicholas A. Pardikes**<sup>2</sup>, **Benjamin Rosenbaum**<sup>3,4</sup>, **Miguel G. Ximénez-Embún**<sup>2</sup>, &  
4 **Jan Hrčěk**<sup>1,2</sup>

5 <sup>1</sup>University of South Bohemia, Faculty of Science, Branisovska 31, 37005, Czech Republic

6 <sup>2</sup>Biology Centre of the Czech Academy of Sciences, Institute of Entomology, Branisovska 31, 37005,  
7 Czech Republic

8 <sup>3</sup>Theory in Biodiversity Science, German Centre for Integrative Biodiversity Research (iDiv), Halle-Jena-  
9 Leipzig, Puschstr. 4, 04103 Leipzig, Germany

10 <sup>4</sup>Institute of Biodiversity, Friedrich Schiller University Jena, Dornburger Str. 159, 07743 Jena, Germany

11 \* Corresponding author: [melanie.thierry34@gmail.com](mailto:melanie.thierry34@gmail.com)

12

13 **Running title:** Warming alters multiple predator effects

14 **Abstract.** Current global changes are reshaping ecological communities and modifying environmental  
15 conditions. We need to recognize the combined impact of these biotic and abiotic factors on species  
16 interactions, community dynamics, and ecosystem functioning. Specifically, the strength of predator-prey  
17 interactions often depends on the presence of other natural enemies: it weakens with competition and  
18 interference or strengthens with facilitation. Such effects of multiple predators on prey are likely to be  
19 affected by changes in the abiotic environment, altering top-down control, a key structuring force in natural  
20 and agricultural ecosystems. Here, we investigated how warming alters the effects of multiple predators on  
21 prey suppression using a dynamic model coupled with empirical laboratory experiments with *Drosophila*-  
22 parasitoid communities. While multiple parasitoids enhanced top-down control under warming, parasitoid  
23 performance generally declined when another parasitoid was present due to competitive interactions. This  
24 could reduce top-down control over multiple generations. Our study highlights the importance of  
25 accounting for interactive effects between abiotic and biotic factors to better predict community dynamics  
26 in a rapidly changing world and thus better preserve ecosystem functioning and services such as biological  
27 control.

28 **Keywords:** biodiversity-ecosystem functioning, global change, temperature, functional response, host-  
29 parasitoid networks, multiple predator effects

## 30 **Introduction**

31 Ongoing global anthropogenic changes alter the abiotic context, changing the outcome of species  
32 interactions [1,2]. Global warming can modify the strength of trophic interactions due to changes in  
33 metabolic rates [3], shifts in spatial distributions and seasonal phenology [4], lethal effects on predators, or  
34 altered attack rates [5–7]. But warming also alters the strength of non-trophic interactions among predators  
35 [8,9]. Altered non-trophic interactions among predators would change the effects of multiple predators on  
36 top-down control [10,11], yet to what extent is unclear. Effects of warming on non-trophic interactions  
37 among predators are often overlooked but essential to accurately forecast ecological consequences of  
38 warming for biological control and ecosystem integrity.

39 The effects of multiple predators on prey suppression are often not additive. Additivity would occur if  
40 predators had independent effects on prey, in which case increased predator density should enhance top-  
41 down control because of higher predatory pressure on the prey. However, direct and indirect interactions  
42 among predators may cause effects to deviate from additivity [12–14]. The effects of multiple predators on  
43 prey can be synergistic (i.e., the effects are greater than what would be expected if they were additive) due  
44 to niche complementarity or facilitation (i.e., risk enhancement for the prey) [15]. By contrast, the effects  
45 of multiple predators on prey can be antagonistic due to intraguild predation, competition, or interference  
46 when the degree of overlap between predator’s foraging areas or phenologies is too high (i.e., risk reduction)  
47 [16]. All such potential effects are called multiple predator effects (MPEs [17]). Emergent MPEs are  
48 particularly important in biological control where introducing one or several predator species might result  
49 in risk reduction for the prey because of competition among predators instead of planned risk enhancement  
50 [18].

51 Warming can alter both trophic and non-trophic interactions. Changes in the strength of these  
52 interactions could modify emergent MPEs, either enhancing or decreasing top-down control. Climate  
53 change also disrupts species composition of communities [4,19], which would change the outcome of  
54 pairwise interactions that are influenced by other species in the community [20–22]. Changes in species

55 composition of communities are thus also likely to alter MPEs, affecting biological control. However,  
56 interactive effects between warming and community composition on top-down control remain poorly  
57 studied, and little is known about how warming alters the effects of multiple predators on top-down control.

58 Here, we used mathematical models in combination with a series of three laboratory experiments on  
59 *Drosophila simulans* and three of its co-occurring larval parasitoids to investigate the effects of warming  
60 on multiple predator effects on top-down control. Host-parasitoid interactions are a particular type of  
61 predator-prey interaction in which parasitoid larvae feed and develop inside or on an arthropod host while  
62 adults are free-living [23]. When host is parasitized, three outcomes are possible: the parasitoid successfully  
63 develops and kills the host, the host survives and successfully eliminates its parasitoid through immune  
64 response (i.e., encapsulation and melanization) [24], or both parties die. The presence of multiple  
65 parasitoids can result in extrinsic competition between adults for space and oviposition (i.e., interference)  
66 and intrinsic competition within a host [25]. Intrinsic competition results from superparasitism or  
67 multiparasitism events when two parasitoids (conspecific or heterospecific) parasitize the same host  
68 individual. A single parasitoid can also lay multiple eggs in a single host as part of a strategy to overwhelm  
69 the host immune system. In solitary parasitoids, such as the species used in the present study, only one  
70 individual completes development in each host, suppressing the other(s) physically or physiologically.  
71 Parasitoids represent an excellent system to study how warming directly changes the effects of multiple  
72 predators on top-down control because the outcome of the interactions is easily observed by rearing the  
73 host, and intrinsic competitive interactions between parasitoids can be observed by dissecting the host larva.  
74 In this study, we empirically measured trophic interaction strength across temperatures and parasitoid  
75 assemblages. We recorded emergent effects of multiple parasitoids on host suppression by comparing  
76 empirical data with estimates in which multiple parasitoids would not interact (i.e., would have an additive  
77 effect) using a mathematical model for multiple co-occurring parasitoids with a functional response  
78 approach [26,27]. With this framework, we addressed three specific questions: (1) Do multiple parasitoids  
79 have additive, synergistic, or antagonistic effects on host suppression? (2) To what extent does temperature

80 modify the outcomes of MPEs? (3) Are changes in host immune response or competitive interaction  
81 strength causing emergent MPEs? Our results demonstrate the principal role of temperature for non-trophic  
82 interactions among parasitoids, with cascading effects on host suppression.

## 83 **Materials and Methods**

### 84 *Biological system*

85 Cultures of *Drosophila simulans* and their associated parasitoids collected from two tropical rainforest  
86 locations in North Queensland Australia: Paluma (S18° 59.031' E146° 14.096') and Kirrama Range (S18°  
87 12.134' E145° 53.102'; both <100 m above sea level; [28]) were used for the experiments. Tropical species  
88 already live close to their upper thermal limits [29]. *Drosophila* species are limited in their evolutionary  
89 potential for thermal adaptation [30,31], making our tropical *Drosophila*-parasitoid community a relevant  
90 system to study effects of future warming conditions on communities. *D. simulans* and parasitoid cultures  
91 were established between 2017 and 2018, identified using both morphology and DNA barcoding, and  
92 shipped to the Czech Republic under permit no. PWS2016-AU-002018 from Australian Government,  
93 Department of the Environment. All cultures were maintained at 23°C and 12:12 hour light and dark cycle  
94 at Biology Centre, Czech Academy of Sciences. The three larval parasitoid species *Asobara sp.*  
95 (Braconidae: Alysiniinae; strain KHB, reference voucher no. USNMENT01557097, reference sequence  
96 BOLD process ID: DROP043-21), *Leptopilina sp.* (Figitidae: Eucolinae; strain 111F, reference voucher no.  
97 USNMENT01557117, reference sequence BOLD process ID: DROP053-21), and *Ganaspis sp.* (Figitidae:  
98 Eucolinae; strain 84BC, reference voucher no. USNMENT01557102 and USNMENT01557297, reference  
99 sequence BOLD process ID: DROP164-21) were used (for more details on the parasitoid strains see [32]).  
100 *Drosophila simulans* isofemale lines were kept on standard *Drosophila* medium (corn flour, yeast, sugar,  
101 agar, and methyl-4-hydroxybenzoate) for approximately 45 to 70 non-overlapping generations before the  
102 experiments. To revive genetic variation, five host lines were combined to establish two population cages  
103 of mass-bred lines before the start of the experiments. Single parasitoid isofemale lines were used and  
104 maintained for approximately 25 to 40 non-overlapping generations before the start of the experiment by

105 providing them every week with two-day-old larvae of a different *Drosophila* species – *Drosophila*  
106 *melanogaster*.

### 107 *Experiments*

108 We used a functional response approach following Mccoy's framework to investigate the effects of warming  
109 on the strength of trophic and non-trophic interactions [26]. We first obtained each parasitoid functional  
110 response parameter at ambient and warmed temperatures with single-parasitoid treatments (Experiment 1).  
111 Then, we used these functional response parameter estimates to predict trophic interaction strength for each  
112 temperature and parasitoid combination with the null hypothesis that parasitoids were not interacting and  
113 thus had additive effects on host suppression. In Experiment 2 we empirically measured the effects of  
114 temperature and parasitoid combinations on trophic interaction strength and compared the predicted and  
115 observed values to identify emergent effects of multiple parasitoids on host suppression and their  
116 dependence on the temperature regime. We performed the two first blocks of Experiment 1 and entire  
117 Experiment 2 in parallel, and controls and single-parasitoid treatments were common to both experiments.  
118 In Experiment 3, we investigated the mechanisms of multiple parasitoid effects by dissecting hosts rather  
119 than rearing them. This allowed us to measure super- and multiparasitism rates and encapsulation depending  
120 on the temperature regime and parasitoid combinations.

121 A total of 22,920 *D. simulans* eggs were collected. 13,120 for experiment 1, 4,800 for experiment 2, and  
122 5,000 for experiment 3 (from which 1,000 larvae were dissected). In experiments 1 and 2, 12,990 eggs  
123 (73%) successfully developed into adults (8,409 hosts and 4,581 parasitoids). The remaining 23% either  
124 died naturally or the host was suppressed without successful development of the parasitoid.

### 125 *Experiment 1: Single-parasitoid experiment*

126 Eggs of *D. simulans* were placed in a single 90 mm high, and 28 mm diameter glass vial with 10mL of  
127 *Drosophila* media at six different densities replicated eight times each (5, 10, 15, 25, 50, or 100 eggs per  
128 10mL of food media in a vial, total number of eggs = 13,120, N = 384 vials; Figure 1b). To collect *D.*  
129 *simulans* eggs, an egg-washing protocol was adapted from [33]. The day before the egg-washing protocol

130 was conducted, two batches of egg-laying medium (Petri dishes with agar gel topped with yeast paste) were  
131 introduced in each population cage for flies to lay eggs overnight. Eggs were transferred to the experimental  
132 vials. We placed half of the vials at ambient temperature ( $22.7^{\circ}\text{C} \pm 0.4$  s.d. - the current mean yearly  
133 temperature at the two study sites [28]), and the other half under elevated temperature ( $27.4^{\circ}\text{C} \pm 0.5$  s.d. -  
134 projected change in global mean surface temperature for the late 21<sup>st</sup> century is  $3.7^{\circ}\text{C}$  for the IPCC RCP8.5  
135 baseline scenario [34]). Like in other *Drosophila* species, the thermal performance curve of *Drosophila*  
136 *simulans* demonstrates a decrease in performance from temperatures above  $25^{\circ}\text{C}$  [35].

137 After 48 hours, we placed one single naïve mated three to five-day-old female parasitoid in each vial  
138 with *D. simulans* larvae. We removed the parasitoids twenty-four hours later. We repeated this for all three  
139 parasitoid species, temperatures, and host densities. We simultaneously performed controls without  
140 parasitoids to obtain the baseline for host survival without parasitism and potential variation during egg  
141 collection (Figure 1a). We checked vials were daily for adult emergences until the last emergence (up to 41  
142 days for the species with the longest developmental time). We waited five consecutive days without any  
143 emergence to stop collecting and thus avoided confounding counts with a second generation. All emerged  
144 insects were collected, identified, sexed, and stored in 95% ethanol. Each treatment was replicated eight  
145 times across eight experimental blocks.

#### 146 *Experiment 2: Multiple parasitoids experiment*

147 To investigate the effect of warming on MPEs, we manipulated parasitoid assemblages and temperature in  
148 a fully factorial design (Figure 1c and d). We followed the same protocol described above for Experiment  
149 1, using 50 *D. simulans* eggs per vial with two female parasitoids either from the same (Figure 1c) or  
150 different species (Figure 1d). Each treatment was replicated eight times across two blocks ( $N = 96$ ).  
151 Controls and single-parasitoid treatments were standardized to experiment 1 with the 50 eggs per vial  
152 density. 50 eggs per standard *Drosophila* vial corresponds to low competition between hosts, a suitable  
153 host/parasitoid ratio when using one or two parasitoids, and enough host per vial for meaningful statistics.

154 *Experiment 3: Mechanisms of MPEs*

155 In a follow-up experiment, we conducted a subset of the treatments described for Experiments 1 and 2 with  
156 *Asobara sp.* and *Ganaspis sp.* We put 50 *D. simulans* eggs per vial with 10 mL of food media under ambient  
157 and warming temperatures and introduced one parasitoid, two conspecific parasitoids, or the two  
158 heterospecific parasitoids, resulting in five different parasitoid assemblages. Each treatment was replicated  
159 ten times across two blocks (N = 100). Instead of rearing the insects to adults, we dissected ten 3<sup>rd</sup> instar  
160 larvae or pupae per vial (Figure 1f). We individually transferred each host larva into a glass petri dish  
161 containing PBS and dissected it under a stereomicroscope. We recorded the number of parasitoid larvae  
162 and eggs of each species to assess superparasitism and multiparasitism events. When possible, we also  
163 identified the number and species of encapsulated parasitoids. Pictures of the eggs, larvae and encapsulated  
164 parasitoids for each species observed during the experiment are presented in Supplemental Material S1  
165 Figure S1. At the elevated temperature, six replicates were dissected two days after infection (early  
166 dissection time) and four three days after infection (late dissection time). At the ambient temperature, four  
167 replicates were dissected three days after infection (early dissection time) and six four days after infection  
168 (late dissection time). We selected different times for dissection at each temperature to standardize  
169 parasitoid developmental stage while still being able to identify all the parasitoids that have parasitized the  
170 host. At the early dissection time, *Asobara sp.* were already at the larval stage, whereas *Ganaspis sp.* were  
171 still eggs. *Ganaspis* larvae were also observed at the late dissection time, sometimes simultaneously with a  
172 larva of *Asobara sp.* within the same host.

173 *Data analysis and modelling*

174 *Experiment 1: Single-parasitoid experiment*

175 We combined numerical simulations of host density dynamics, accounting for host depletion [36]:

176 
$$\frac{dH}{dt} = -F(H)P,$$



177 with Bayesian parameter estimation using the *rstan* package (e.g. [37]).  $P = 1$  is the parasitoid density,  
178 and  $F(H)$  denotes the host density-dependent functional response. In the model fitting, we used Markov  
179 chain Monte Carlo to sample from the functional response's model parameters' posterior probability  
180 distribution  $p(\theta|H_{\text{sup}})$  given the observations  $H_{\text{sup}}$ , based on the likelihood function  $p(H_{\text{sup}}|\theta)$  and prior  
181 distributions  $p(\theta)$ , with  $\theta$  the free parameters.  $H_{\text{sup}}$  is the number of *D. simulans* suppressed (the difference  
182 between adult hosts emerging from the controls without parasitoids and from the experiment). In each  
183 iteration, we computed numerical solutions of the equation with the built-in *Runge-Kutta* ODE solver to  
184 predict densities  $\hat{H}_1$  after one day for each given initial host density,  $H_0$ . The initial host densities were  
185 taken from the average number of hosts that emerged from the controls for each density and temperature to  
186 account for potential deviations between the aimed and actual densities (Table S1). The likelihood was  
187 evaluated assuming a binomial distribution for observed numbers of suppressed hosts  $H_{\text{sup}}$  with  $n = H_0$  trials  
188 and  $p = \frac{H_0 - \hat{H}_1}{H_0}$  success probability. We used vague priors for all model parameters.

189 We fitted three different functional response models (Type II, Type III and generalized Type III) and  
190 retained the Type II functional response [38] after model comparison (see Supplement Material S2). The  
191 equation for the instantaneous attack rate of a parasitoid is as follows:

$$192 \quad F(H) = \frac{aH}{1 + ahH}$$

193 where  $a$  is the attack rate, and  $h$  is the handling time. Type II functional responses are thought to  
194 characterize the attack rate of many types of predators and parasitoids [39]. Parameter estimates and the  
195 functional responses for each species at each temperature are presented in Supplement Material S2 (Table  
196 S2 and Figure S2).

197 *Experiment 2: Multiple parasitoids experiment*

198 Host-parasitoid interaction strength was described with the combination of Degree of Infestation (DI; i.e.,  
199 host suppression) and Successful Parasitism rate (SP; i.e., parasitoid performance). The observed degree of  
200 infestation ( $DI_{obs}$ ) and Successful parasitism rate ( $SP$ ) were measured as:

201 
$$DI_{obs} = 1 - \frac{H}{H_C} ; SP = \frac{P}{H_C - H}$$

202 where  $H$  is the number of adult hosts emerging from the experiment vial,  $H_C$  is the mean number of adult  
203 hosts emerging from the controls without parasitoids, and  $P$  is the number of parasitoid adults emerging  
204 from the experimental vial [40,41].  $DI_{obs}$  was set to zero if the number of hosts emerging from the treatment  
205 was greater than the controls. If no parasitoid emerged or the number of hosts suppressed was estimated to  
206 be zero,  $SP$  was set to zero. If the number of parasitoids that emerged was greater than the estimated number  
207 of hosts suppressed,  $SP$  was assigned to one. For treatments with parasitoid conspecifics, we assumed that  
208 each of the two parasitoid individuals was attacking the hosts equally; therefore, the number of parasitoid  
209 adults emerging was divided by two to calculate individual successful parasitism rate.

210 We analyzed these data with generalized linear models (GLMs) and verified model assumptions with  
211 the *DHARMA* package [42]. To correct for overdispersion of the residuals and zero inflation, data were  
212 modeled using zero-inflation models with a beta-binomial error distribution and a logit function using the  
213 *glmmTMB* function from the *TMB* package [43]. Two categories of predictor variables were used in separate  
214 models with temperature treatment (two levels: ambient and warming): (i) parasitoid treatment (three levels;  
215 single parasitoid, two parasitoids conspecific, and two parasitoids heterospecific), and (ii) parasitoid species  
216 assemblage (nine levels). The two-way interactions between temperature and either parasitoid treatment or  
217 parasitoid assemblage were tested and kept in our models if judged to be significant based on backward  
218 model selection using Likelihood-ratio tests. The significance of the effects was tested using Wald type III  
219 analysis of deviance with Likelihood-ratio tests. Factor levels were compared using Tukey's HSD *post hoc*

220 comparisons of all means and the *emmeans* package [44]. Results for developmental rate are presented in  
221 Supplement Material S3 Figure S3.

### 222 *Estimation of multiple parasitoid effects*

223 To predict the degree of infestation if parasitoids have independent effects on host suppression, we used  
224 the method developed by McCoy *et al.* [26], which considers host depletion. This method uses the functional  
225 responses obtained from Experiment 1 in a population-dynamic model to predict how host density changes  
226 in time as a function of initial density and parasitoid combination for each temperature. We thus calculated  
227 the estimated Degree of Infestation ( $DI_0$ ) by integrating the aggregate attack rates over the duration of the  
228 experiment as host density declines. We first solved the equation

$$229 \quad \frac{dH}{dt} = - \sum_{i=1}^n \frac{a_i H_t P_i}{1 + a_i h_i H_t}$$

230 similar to the equation described for Experiment 1 but adapted to  $n$  parasitoids. Then we calculated the  
231 estimated Degree of Infestation as

$$232 \quad DI_0 = 1 - \frac{H_T}{H_0}$$

233 where  $H_0$  is the initial host density, and  $H_T$  is the estimated host population at the end of the experiment  
234 (time  $T = 1$  day). This method allows a reasonable estimate of  $DI_0$  for the null hypothesis that predators do  
235 not interact [27]. The lower and upper confidence intervals (CI) around the predicted values were estimated  
236 with a global sensitivity analysis based on the functional response parameters estimates to generate 100  
237 random parameter sets using a Latin hypercube sampling algorithm [45]. The expected degree of infestation  
238 was calculated for each parameter set using the *sensRange* function in the R package *FME*. The 2.5% and  
239 the 97.5% quantiles of the values obtained from these simulations were used as 95% CIs around the  
240 predictions.

241 Predictions from the population dynamic model were then compared with the observed values ( $DI_{obs}$ ).  
242 Estimated DI values greater than observed DI translate to risk reduction, while lower estimates reflect risk

243 enhancement for the host with multiple parasitoids. We calculated the difference between  $DI_{obs}$  and mean  
244  $DI_0$  for each treatment and investigated the effects of temperature (ambient versus warmed), parasitoid  
245 diversity (one or two species), and their interaction if significant, using an analysis of variance (ANOVA)  
246 with the *aov* function. We statistically compared the observed and estimated DI for each temperature regime  
247 using GLMs with a beta-binomial error distribution and a logit function with  $DI_0$  as an offset (i.e., predictor  
248 variable) following Sentis et al. (2017). A positive or negative significant intercept indicates that  $DI_0$  values  
249 underestimate or overestimate  $DI_{obs}$ , respectively.

### 250 *Experiment 3: MPEs mechanisms*

251 The frequency of super- and multiparasitism events was calculated out of the larvae parasitized per vial  
252 (total of 1,000 larvae dissected across 100 vials, out of which 868 were parasitized: presence of either one  
253 or both parasitoid species and/or trace of melanization). The frequency of encapsulated parasitoids was  
254 calculated out of the total number of parasitoids per larva. Effects of temperature and parasitoid  
255 assemblages on these frequencies were analyzed with generalized linear mixed models (GLMMs) with the  
256 method described for Experiment 2 and the time of dissection (early or late) as a random effect. All analyses  
257 were performed using R 4.0.2 [46].

## 258 **Results**

### 259 *Effects of multiple parasitoids on host suppression under warming*

260 The degree of infestation observed in the experiment varied from the model estimations (Figure 2).  
261 Temperature significantly affected these differences ( $F_{1,93} = 13.9$ ,  $P < 0.0001$ ), but parasitoid diversity did  
262 not ( $F_{1,93} = 0.09$ ,  $P = 0.766$ ) (Table S3, Table S4), implying that parasitoid density rather than their diversity  
263 is important for host suppression. The comparison of the estimated and observed DI revealed that, in most  
264 cases, there was no significant difference between predicted and observed DI at ambient temperature,  
265 implying neutral effects with multiple parasitoids (when looking at the intercept of the GLM with  $DI_0$  as an  
266 offset; value  $\pm$  SE:  $0.12 \pm 0.32$ ,  $z$  value = 0.381,  $df = 40$ ,  $P = 0.703$ ), whereas under warming the predicted

267  $DI_o$  significantly underestimated the observed  $DI_{obs}$ , implying risk enhancement for the host (value  $\pm$  SE:  
268  $0.44 \pm 0.18$ , z value = 2.431, df = 40, P = 0.015; Figure 2).

269 *Effects of warming and parasitoid assemblages on the observed degree of infestation*

270 Contrary to the effects of multiple parasitoids on host suppression, the observed degree of infestation  $DI_{obs}$   
271 was not significantly affected by temperature ( $\chi^2_{(1)} = 1.05$ , P = 0.306), or parasitoid treatment (single, two  
272 conspecific or two heterospecific parasitoid assemblages:  $\chi^2_{(2)} = 4.26$ , P = 0.119; Table S5) due to species-  
273 specific effects. DI only varied with parasitoid species assemblages ( $\chi^2_{(8)} = 251.92$ , P < 0.0001, Table S6).  
274 DI was the highest in assemblages with *Ganaspis sp.*, either alone, with a conspecific, or another parasitoid  
275 species (Figure S4).

276 *Effect of warming and parasitoid assemblages on parasitoid performance*

277 Despite having no effect on DI, parasitoid treatment (single, two conspecific, or two heterospecific  
278 parasitoid assemblages) significantly affected successful parasitism rate, and the effect varied among  
279 parasitoid species (two-way interaction:  $\chi^2_{(4)} = 16.88$ , P = 0.002; Table 1; Table S7). SP of *Ganaspis sp.*  
280 decreased by 95.7% (95% CI: 93.6 - 97.8%) with the presence of a parasitoid conspecific [*Post hoc* Odds  
281 Ratio (OR) = 0.043, P < 0.0001 for contrast 2Pc/1P; Table S8], and by 83.4% (CI: 75.4 - 91.3%) with the  
282 presence of a parasitoid heterospecific compared to when alone (OR = 0.166, P < 0.001 for contrast 2Ph/1P;  
283 Table S8). However, it increased by 287.6% (CI: 178.8 - 396.4%) when the parasitoid competitor was from  
284 another species compared to a conspecific (OR = 3.876, P < 0.0001, for contrast 2Pc/2Ph; Table S8). SP of  
285 *Asobara sp.* decreased by 55.2% (CI: 41.5 - 69.7%) when a parasitoid conspecific was present compared  
286 to when alone (OR = 0.448, P = 0.036), but was not significantly affected by the presence of a parasitoid  
287 heterospecific (OR = 0.712, P = 0.484). There were no significant effects of parasitoid treatments for SP of  
288 *Leptopilina sp.* Effects of parasitoid assemblages on SP also varied between parasitoid species and are  
289 presented in Supplementary Material S6 (Table S9, Table S10, and Figure S5).

290 Effects of temperature on SP also depended on the species (two-way interaction:  $\chi^2_{(2)} = 7.31$ , P = 0.026;  
291 Table S7). Only *Ganaspis sp.* was significantly affected by temperature, and its SP decreased by 58.8%

292 (CI: 69.8 - 47.8%) with warming (OR = 0.412,  $\chi^2_{(1)} = 10.17$ ,  $P = 0.001$ ). However, all species developed  
293 faster under warming (Figure S3).

#### 294 *Mechanisms of MPEs*

295 The frequency of either super- or multiparasitism events, reflecting strength of intrinsic competition among  
296 parasitoids, was significantly affected by parasitoid assemblages ( $\chi^2_{(4)} = 572.40$ ,  $P < 0.0001$ ), temperature  
297 ( $\chi^2_{(1)} = 4.49$ ,  $P = 0.034$ ), and the interaction between parasitoid assemblages and temperature  $\chi^2_{(4)} = 36.04$ ,  
298  $P < 0.0001$ ; Figure 3, Table S11). Superparasitism rate increased by 239% (CI: 230-308%) when *Ganaspis*  
299 *sp.* was with a conspecific (OR = 3.69,  $P < 0.0001$ ), and by 581% (CI: 411-751%) when *Asobara sp.* was  
300 with a conspecific (OR = 6.81,  $P < 0.0001$ ) compared to when they were alone, but without significant  
301 differences between temperature treatments. In the parasitoids heterospecific treatments, warming  
302 significantly increased the frequency of super- and multiparasitism events by 173% (CI: 130-216%; OR =  
303 2.73,  $P < 0.0001$ ), indicating an increase in intrinsic competition among parasitoids with warming.

304 The frequency of encapsulated parasitoids differed between parasitoid species, but not between  
305 treatments (results presented in Supplement Material S8: Table S12 and Figure S6), indicating that host  
306 immune response did not change depending on the treatments.

#### 307 **Discussion**

308 The key result from our study is the synergistic effects of multiple predators for top-down control at elevated  
309 temperature across predator assemblages. However, parasitoid performance often decreased when multiple  
310 parasitoids were present due to intrinsic competition among parasitoids, potentially limiting the long-term  
311 benefits for ecosystem functioning.

#### 312 *Warming increases the effects of multiple predators on the risk of predation*

313 Our results showed that warming led to a higher top-down control than expected with multiple predators.  
314 Indeed, our mathematical model underestimated trophic interaction strength measured in multiple predators  
315 treatments at elevated temperatures. Our results are in concordance with previous studies on diverse systems

316 on the importance of considering non-trophic interactions to predict the effect of multiple predators on top-  
317 down control under global changes. Drieu et al. [47] found that predator diversity enhanced the biological  
318 control of insect pests in vineyards under warming due to functional complementarity among predator  
319 species, while effects were substitutive at ambient temperature. Cuthbert et al. [11] also found an impact of  
320 temperature on intraspecific multiple predator effects on an invasive Gammaridae species (Amphipoda).  
321 Yet, the direction of the effects contrasted ours as they observed risk enhancement at low temperature and  
322 risk reduction with warming. Sentis et al. [10] found a general trend of predation risk reduction for the prey  
323 with multiple predators in an aquatic food web but without any effect of temperature on those emergent  
324 MPEs. Our study goes further by showing the important impact of warming on the impacts of multiple  
325 predators on prey suppression across multiple assemblages of conspecifics and heterospecifics. In addition  
326 to increasing prey suppression with multiple predators under warming in terrestrial ecosystems, a diverse  
327 predator community also increases the chances of complementarity in the face of environmental variation  
328 and disturbance [48]. Indeed, the presence of multiple predator species could mitigate the adverse effects  
329 of warming on top-down control due to resource partitioning and/or functional redundancy [47,49,50].  
330 Therefore, preserving predator biodiversity should be generally beneficial for top-down control under  
331 climate change.

### 332 *Mechanisms behind emergent multiple predator effects on the prey*

333 Because of the synergistic effects of multiple parasitoids on host suppression under warming found in our  
334 study, we could have hypothesized that warming weakens interference between parasitoids, similarly to  
335 predator-prey systems [51]. However, our host-parasitoid system allowed us to investigate further the  
336 potential mechanisms behind our results, especially the strength of intrinsic competitive interactions  
337 between parasitoids (i.e., frequency of superparasitism and multiparasitism events). We found generally  
338 higher intrinsic competition in multiple parasitoid treatments than single parasitoid treatments and higher  
339 intrinsic competition under warming when the two species were present compared to ambient temperature.  
340 When superparasitized or multiparasitized, the host was less likely to survive, possibly because its immune

341 response was less likely to overcome multiple parasitoids. Therefore, the higher top-down control observed  
342 under warming with multiple parasitoids was due to a higher parasitism pressure and not because of weaker  
343 interactions between parasitoids.

344 We conducted the experiments in simplified laboratory conditions and forced parasitoids to share the  
345 same habitat (a vial) and overlapped in time (24 hours), which does not allow for resource partitioning [52].  
346 This might have enhanced the rate of super- and multi-parasitism events and thus top-down control. In  
347 nature, warming could also change predator habitat use [8,9], and phenology [53,54], leading to changes in  
348 MPEs. However, the impact of temperature on MPEs was consistent across parasitoid assemblages,  
349 suggesting a general pattern for synergistic effects with multiple natural enemies under warming in our  
350 system.

#### 351 *Parasitoid performance was mostly affected by parasitoid assemblage*

352 Despite multiple parasitoids enhancing host suppression under warming, the successful parasitism rate was  
353 often lower at both temperatures when another parasitoid individual was present, probably due to the strong  
354 intrinsic competitive interactions observed through dissections. A decrease in parasitoid performance would  
355 potentially limit the synergistic effects of multiple parasitoids for host suppression in the long term.  
356 Similarly, another study on *Drosophila*-parasitoid interactions observed a significant impact of thermal  
357 regime on parasitoid success, but still without changes in the observed degree of infestation [55]. The long-  
358 term effects of warming on parasitoid populations are thus uncertain, and hosts from the next generation  
359 might benefit from lower parasitoid abundances due to a lower rate of successful parasitism.

#### 360 *Similar effects of intra- versus interspecific multiple parasitoids on top-down control*

361 Similar to other studies, we did not find significant differences between treatments with multiple  
362 conspecifics or heterospecific predators for prey suppression [56–58]. Therefore, it is essential to look at  
363 the effects of both predator diversity and density on prey suppression, rather than only using a substitutive  
364 approach (i.e., keeping predator density constant [52]), which might confound the results. When niche  
365 differentiation is allowed, for example, with habitat heterogeneity or a more prolonged timeframe that



366 includes potential differences in phenology, an increase in predator diversity should intensify prey  
367 suppression because of functional diversity rather than because of diversity *per se* [58–60]. Here, two  
368 predators of the same species rather than a single predator intensified prey suppression at warmer  
369 temperatures despite the small scale of the experiment. Allowing for differentiation in habitat domain  
370 between predator species might have yielded higher prey suppression in treatments with heterospecifics  
371 and a lower rate of multiparasitism. Given the likely ubiquity of resource partitioning in nature [61],  
372 preserving predator biodiversity would be the best strategy to maintain top-down control.

### 373 *No effects of treatments on the observed degree of infestation*

374 Warming had a significant effect on the differences between observed and estimated degree of infestation.  
375 However, temperature treatment had no significant effect on the observed degree of infestation. Moreover,  
376 prey suppression was generally higher when predator assemblages included the best-performing species,  
377 *Ganaspis sp.*, no matter the predator treatment or temperature. A meta-analysis on the effects of predator  
378 diversity on prey suppression found a similar trend across the 46 studies taken into account [62], but also  
379 found a general positive effect of multiple predators on top-down control. Contrastingly, a meta-analysis  
380 of 108 biological control projects found no relationship between the number of agents released and  
381 biological control success for insect pests [63]. However, increasing predator diversity should be generally  
382 beneficial for top-down control by increasing the chances to have a more effective natural enemy species  
383 in the community, as was the case in our study (i.e., sampling effect model [64]). Moreover, the presence  
384 of multiple species in the community could buffer any mismatch between predator and prey species induced  
385 by warming [65]. *Ganaspis sp.* was the best performing species in suppressing *D. simulans* across  
386 treatments. Still, its performance decreased with warming, suggesting that parasitism rate, and therefore  
387 host suppression, could also be reduced in the longer term due to a decrease in parasitoid population.

### 388 *Conclusion*

389 Overall, pairwise interaction strength generally failed to accurately estimate the trophic interaction strength  
390 observed, indicating that non-trophic interactions must be considered to predict the effects of multiple

391 predators on prey suppression and in food web studies in general [66]. While previous studies show altered  
392 MPEs with warming due to changes in resource partitioning [8,11], our study is the first, to our knowledge,  
393 to show signs of direct effects of warming on predator interactions across predator assemblages, resulting  
394 in a higher top-down control with multiple predators at elevated temperature.

## 395 **Acknowledgements**

396 We thank Anna Mácová, Andrea Weberova, Grégoire Proudhom, and Joel Brown for their help during the  
397 setup of the experiments, and Tereza Holicová and Vincent Montbel for their help dissecting the larvae.  
398 Tereza Holicová made the drawings used for Figure 1. We acknowledge funding support from the Czech  
399 Science Foundation grant no. 20-30690S. BR acknowledges the support of iDiv funded by the German  
400 Research Foundation (DFG–FZT 118, 202548816).

## 401 **References**

- 402 1. Song C, Von Ahn S, Rohr RP, Saavedra S. 2020 Towards a probabilistic understanding about the  
403 context-dependency of species interactions. *Trends Ecol. Evol.* **35**, 384–396.  
404 (doi:10.1016/j.tree.2019.12.011)
- 405 2. Davis AJ, Lawton JH, Shorrocks B, Jenkinson LS. 1998 Individualistic species responses invalidate  
406 simple physiological models of community dynamics under global environmental change. *J. Anim.*  
407 *Ecol.* **67**, 600–612. (doi:10.1046/j.1365-2656.1998.00223.x)
- 408 3. Rall BÖC, Vucic-Pestic O, Ehnes RB, Emmerson M, Brose U. 2010 Temperature, predator-prey  
409 interaction strength and population stability. *Glob. Chang. Biol.* **16**, 2145–2157.  
410 (doi:10.1111/j.1365-2486.2009.02124.x)
- 411 4. Parmesan C. 2006 Ecological and evolutionary responses to recent climate change. *Annu. Rev. Ecol.*  
412 *Evol. Syst.* **37**, 637–669. (doi:10.1146/annurev.ecolsys.37.091305.110100)
- 413 5. Thierry M, Hrčěk J, Lewis OT. 2019 Mechanisms structuring host–parasitoid networks in a global  
414 warming context: a review. *Ecol. Entomol.* , eea.12750. (doi:10.1111/eea.12750)
- 415 6. Hance T, Baaren J van, Vernon P, Boivin G. 2007 Impact of extreme temperatures on parasitoids in

- 416 a climate change perspective. *Annu. Rev. Entomol.* **52**, 107–126.  
417 (doi:10.1146/annurev.ento.52.110405.091333)
- 418 7. Uszko W, Diehl S, Englund G, Amarasekare P. 2017 Effects of warming on predator–prey  
419 interactions – a resource-based approach and a theoretical synthesis. *Ecol. Lett.* **20**, 513–523.  
420 (doi:10.1111/ele.12755)
- 421 8. Barton BT, Schmitz OJ. 2009 Experimental warming transforms multiple predator effects in a  
422 grassland food web. *Ecol. Lett.* **12**, 1317–1325. (doi:10.1111/j.1461-0248.2009.01386.x)
- 423 9. Schmitz OJ, Barton BT. 2014 Climate change effects on behavioral and physiological ecology of  
424 predator-prey interactions: Implications for conservation biological control. *Biol. Control* **75**, 87–  
425 96. (doi:10.1016/j.biocontrol.2013.10.001)
- 426 10. Sentis A, Gémard C, Jaugeon B, Boukal DS. 2017 Predator diversity and environmental change  
427 modify the strengths of trophic and nontrophic interactions. *Glob. Chang. Biol.* **23**, 2629–2640.  
428 (doi:10.1111/gcb.13560)
- 429 11. Cuthbert RN, Wasserman RJ, Dalu T, Briski E. 2021 Warming mediates intraspecific multiple  
430 predator effects from an invasive crustacean. *Mar. Biol.* **168**, 35. (doi:10.1007/s00227-021-03840-  
431 z)
- 432 12. Schmitz OJ. 2007 Predator diversity and trophic interactions. *Ecology* **88**, 2415–2426.  
433 (doi:10.1890/06-0937.1)
- 434 13. Sih A, Englund G, Wooster D. 1998 Emergent impacts of multiple predators on prey. *Trends Ecol.*  
435 *Evol.* **13**, 350–355. (doi:10.1016/S0169-5347(98)01437-2)
- 436 14. Resetarits WJ, Bohenek JR, Pintar MR. 2021 Predator-specific responses and emergent multi-  
437 predator effects on oviposition site choice in grey treefrogs, *Hyla chrysoscelis*. *Proc. R. Soc. B Biol.*  
438 *Sci.* **288**. (doi:10.1098/rspb.2021.0558)
- 439 15. Schmitz OJ. 2009 Effects of predator functional diversity on grassland ecosystem function. *Ecology*  
440 **90**, 2339–2345. (doi:10.1890/08-1919.1)
- 441 16. Laubmeier AN, Rebarber R, Tenhumberg B. 2020 Towards understanding factors influencing the

- 442 benefit of diversity in predator communities for prey suppression. *Ecosphere* **11**, e03271.  
443 (doi:10.1002/ecs2.3271)
- 444 17. Soluk DA. 1993 Multiple predator effects: predicting combined functional response of stream fish  
445 and invertebrate predators. *Ecology* **74**, 219–225. (doi:10.2307/1939516)
- 446 18. Tylianakis JM, Romo CM. 2010 Natural enemy diversity and biological control: making sense of  
447 the context-dependency. *Basic Appl. Ecol.* **11**, 657–668. (doi:10.1016/j.baae.2010.08.005)
- 448 19. Thierry M, Pardikes NA, Lue CH, Lewis OT, Hrček J. 2021 Experimental warming influences  
449 species abundances in a *Drosophila* host community through direct effects on species performance  
450 rather than altered competition and parasitism. *PLoS One* **16**, e0245029.  
451 (doi:10.1371/journal.pone.0245029)
- 452 20. Kéfi S, Berlow EL, Wieters EA, Joppa LN, Wood SA, Brose U, Navarrete SA. 2015 Network  
453 structure beyond food webs: Mapping non-trophic and trophic interactions on Chilean rocky shores.  
454 *Ecology* **96**, 291–303. (doi:10.1890/13-1424.1)
- 455 21. Wootton JT. 1997 Estimates and tests of per capita interaction strength: Diet, abundance, and impact  
456 of intertidally foraging birds. *Ecol. Monogr.* **67**, 45–64. (doi:10.1890/0012-  
457 9615(1997)067[0045:EATOPC]2.0.CO;2)
- 458 22. Thierry M, Pardikes NA, Ximénez-Embún MG, Proudhom G, Hrček J. 2021 Multiple parasitoid  
459 species enhance top-down control, but parasitoid performance is context-dependent. *bioRxiv* ,  
460 2021.07.16.452484. (doi:10.1101/2021.07.16.452484)
- 461 23. Godfray HCJ. 2013 Parasitoids. In *Encyclopedia of Biodiversity: Second Edition*, pp. 674–682.  
462 (doi:10.1016/B978-0-12-384719-5.00152-0)
- 463 24. Carton Y, Poirié M, Nappi AJ. 2008 Insect immune resistance to parasitoids. *Insect Sci.* **15**, 67–87.  
464 (doi:10.1111/j.1744-7917.2008.00188.x)
- 465 25. Harvey JA, Poelman EH, Tanaka T. 2013 Intrinsic inter- and intraspecific competition in parasitoid  
466 wasps. *Annu. Rev. Entomol.* **58**, 333–351. (doi:10.1146/annurev-ento-120811-153622)
- 467 26. McCoy MW, Stier AC, Osenberg CW. 2012 Emergent effects of multiple predators on prey survival:

- 468 The importance of depletion and the functional response. *Ecol. Lett.* **15**, 1449–1456.  
469 (doi:10.1111/ele.12005)
- 470 27. Sentis A, Boukal DS. 2018 On the use of functional responses to quantify emergent multiple  
471 predator effects. *Sci. Rep.* **8**, 1–12. (doi:10.1038/s41598-018-30244-9)
- 472 28. Jeffs CT *et al.* 2021 Molecular analyses reveal consistent food web structure with elevation in  
473 rainforest *Drosophila* - parasitoid communities. *Ecography (Cop.)*. **44**, 403–413.  
474 (doi:10.1111/ecog.05390)
- 475 29. Deutsch CA, Tewksbury JJ, Huey RB, Sheldon KS, Ghalambor CK, Haak DC, Martin PR. 2008  
476 Impacts of climate warming on terrestrial ectotherms across latitude. *Proc. Natl. Acad. Sci. U. S. A.*  
477 **105**, 6668–6672. (doi:10.1073/pnas.0709472105)
- 478 30. Kellermann V, Overgaard J, Hoffmann AA, Fløjgaard C, Svenning J-C, Loeschcke V. 2012 Upper  
479 thermal limits of *Drosophila* are linked to species distributions and strongly constrained  
480 phylogenetically. *Proc. Natl. Acad. Sci.* **109**, 16228–16233. (doi:10.1073/pnas.1207553109)
- 481 31. Overgaard J, Kearney MR, Hoffmann AA. 2014 Sensitivity to thermal extremes in Australian  
482 *Drosophila* implies similar impacts of climate change on the distribution of widespread and tropical  
483 species. *Glob. Chang. Biol.* **20**, 1738–1750. (doi:10.1111/gcb.12521)
- 484 32. Lue C-H *et al.* 2021 DROP: Molecular voucher database for identification of *Drosophila*  
485 parasitoids. *Mol. Ecol. Resour.* (doi:10.1111/1755-0998.13435)
- 486 33. Nouhaud P, Mallard F, Poupardin R, Barghi N, Schlötterer C. 2018 High-throughput fecundity  
487 measurements in *Drosophila*. *Sci. Rep.* **8**, 4469. (doi:10.1038/s41598-018-22777-w)
- 488 34. Pachauri RK, Meyer L, Hallegatte France S, Bank W, Hegerl G, Brinkman S, van Kesteren L,  
489 Leprince-Ringuet N, van Boxmeer F. 2014 *IPCC, 2014: Climate Change 2014: Synthesis Report.*  
490 *Contribution of Working Groups I, II and III to the Fifth Assessment Report of the Intergovernmental*  
491 *Panel on Climate Change e [Core Writing Team, R.K. Pachauri and L.A. Meyer (eds.)].* IPCC,  
492 Geneva, Switzerland. See <http://www.ipcc.ch>.
- 493 35. MacLean HJ, Sørensen JG, Kristensen TN, Loeschcke V, Beedholm K, Kellermann V, Overgaard

- 494 J. 2019 Evolution and plasticity of thermal performance: An analysis of variation in thermal  
495 tolerance and fitness in 22 *Drosophila* species. *Philos. Trans. R. Soc. B Biol. Sci.* **374**, 20180548.  
496 (doi:10.1098/rstb.2018.0548)
- 497 36. Rosenbaum B, Rall BC. 2018 Fitting functional responses: Direct parameter estimation by  
498 simulating differential equations. *Methods Ecol. Evol.* **9**, 2076–2090. (doi:10.1111/2041-  
499 210X.13039)
- 500 37. Sohlström EH, Archer LC, Gallo B, Jochum M, Kordas RL, Rall BC, Rosenbaum B, O’Gorman EJ.  
501 2021 Thermal acclimation increases the stability of a predator-prey interaction in warmer  
502 environments. *Glob. Chang. Biol.* , gcb.15715. (doi:10.1111/gcb.15715)
- 503 38. Holling CS. 1959 Some characteristics of simple types of predation and parasitism. *Can. Entomol.*  
504 **91**, 385–398.
- 505 39. Fernández-Arhex V, Corley JC. 2003 The functional response of parasitoids and its implications for  
506 biological control. *Biocontrol Sci. Technol.* **13**, 403–413. (doi:10.1080/0958315031000104523)
- 507 40. Carton Y, Kitano H. 1981 Evolutionary relationships to parasitism by seven species of the  
508 *Drosophila melanogaster* subgroup. *Biol. J. Linn. Soc.* **16**, 227–241. (doi:10.1111/j.1095-  
509 8312.1981.tb01849.x)
- 510 41. Boulétreau M, Wajnberg E. 1986 Comparative responses of two sympatric parasitoid cynipids to  
511 the genetic and epigenetic variations of the larvae of their host, *Drosophila melanogaster*. *Entomol.*  
512 *Exp. Appl.* **41**, 107–114. (doi:10.1111/j.1570-7458.1986.tb00516.x)
- 513 42. Hartig F. 2019 DHARMA: Residual Diagnostics for Hierarchical (Multi-Level / Mixed) Regression  
514 Models.
- 515 43. Lüdecke D, Makowski D, Waggoner P. 2019 *Performance: Assessment of regression models*  
516 *performance*. See <https://cran.r-project.org/package=performance>.
- 517 44. Lenth R V. 2018 Emmeans: Estimated marginal means, aka least-squares means. *R Packag. version*
- 518 45. Soetaert K, Petzoldt T. 2010 Inverse modelling, sensitivity and monte carlo analysis in R using  
519 package FME. *J. Stat. Softw.* **33**, 1–28. (doi:10.18637/jss.v033.i03)

- 520 46. Team RC. 2017 R: The R Project for statistical computing.
- 521 47. Drieu R, Rusch A. 2017 Conserving species-rich predator assemblages strengthens natural pest  
522 control in a climate warming context. *Agric. For. Entomol.* **19**, 52–59. (doi:10.1111/afe.12180)
- 523 48. Macfadyen S, Craze PG, Polaszek A, van Achterberg K, Memmott J. 2011 Parasitoid diversity  
524 reduces the variability in pest control services across time on farms. *Proc. R. Soc. B Biol. Sci.* **278**,  
525 3387–3394. (doi:10.1098/rspb.2010.2673)
- 526 49. Cebolla R, Urbaneja A, Baaren J van, Tena A. 2018 Negative effect of global warming on biological  
527 control is mitigated by direct competition between sympatric parasitoids. *Biol. Control* **122**, 60–66.  
528 (doi:10.1016/j.biocontrol.2018.04.006)
- 529 50. Pepi A, McMunn M. 2021 Predator diversity and thermal niche complementarity attenuate indirect  
530 effects of warming on prey survival. *Am. Nat.* (doi:10.1086/714590)
- 531 51. Lang B, Rall BC, Brose U. 2012 Warming effects on consumption and intraspecific interference  
532 competition depend on predator metabolism. *J. Anim. Ecol.* **81**, 516–523. (doi:10.1111/j.1365-  
533 2656.2011.01931.x)
- 534 52. Ives AR, Cardinale BJ, Snyder WE. 2005 A synthesis of subdisciplines: Predator-prey interactions,  
535 and biodiversity and ecosystem functioning. *Ecol. Lett.* **8**, 102–116. (doi:10.1111/j.1461-  
536 0248.2004.00698.x)
- 537 53. Abarca M, Spahn R. 2021 Direct and indirect effects of altered temperature regimes and  
538 phenological mismatches on insect populations. *Curr. Opin. Insect Sci.*  
539 (doi:10.1016/j.cois.2021.04.008)
- 540 54. Renner SS, Zohner CM. 2018 Climate change and phenological mismatch in trophic interactions  
541 among plants, insects, and vertebrates. *Annu. Rev. Ecol. Evol. Syst.* **49**, 165–182.  
542 (doi:10.1146/annurev-ecolsys-110617-062535)
- 543 55. Delava E, Fleury F, Gibert P. 2016 Effects of daily fluctuating temperatures on the *Drosophila*–  
544 *Leptopilina boulandi* parasitoid association. *J. Therm. Biol.* **60**, 95–102.  
545 (doi:10.1016/j.jtherbio.2016.06.012)



- 546 56. Lampropoulos PD, Perdikis DC, Fantinou AA. 2013 Are multiple predator effects directed by prey  
547 availability? *Basic Appl. Ecol.* **14**, 605–613. (doi:10.1016/j.baae.2013.08.004)
- 548 57. Griffin JN, Toscano BJ, Griffen BD, Silliman BR. 2015 Does relative abundance modify multiple  
549 predator effects? *Basic Appl. Ecol.* **16**, 641–651. (doi:10.1016/j.baae.2015.05.003)
- 550 58. Finke DL, Snyder WE. 2008 Niche partitioning increases resource exploitation by diverse  
551 communities. *Science (80-. )*. **321**, 1488–1490. (doi:10.1126/science.1160854)
- 552 59. Krey KL *et al.* 2021 Prey and predator biodiversity mediate aphid consumption by generalists. *Biol.*  
553 *Control* **160**, 104650. (doi:10.1016/j.biocontrol.2021.104650)
- 554 60. Greenop A, Woodcock BA, Wilby A, Cook SM, Pywell RF. 2018 Functional diversity positively  
555 affects prey suppression by invertebrate predators: a meta-analysis. *Ecology* **99**, 1771–1782.  
556 (doi:10.1002/ecy.2378)
- 557 61. Chesson P. 1991 A need for niches? *Trends Ecol. Evol.* **6**, 26–28. (doi:10.1016/0169-  
558 5347(91)90144-M)
- 559 62. Griffin JN, Byrnes JEK, Cardinale BJ. 2013 Effects of predator richness on prey suppression: A  
560 meta-analysis. *Ecology* **94**, 2180–2187. (doi:10.1890/13-0179.1)
- 561 63. Denoth M, Frid L, Myers JH. 2002 Multiple agents in biological control: Improving the odds? *Biol.*  
562 *Control* **24**, 20–30. (doi:10.1016/S1049-9644(02)00002-6)
- 563 64. Myers JH, Higgins C, Kovacs E. 1989 How many insect species are necessary for the biological  
564 control of insects? *Environ. Entomol.* **18**, 541–547. (doi:10.1093/ee/18.4.541)
- 565 65. Pardikes N, Revilla T, Lue C-H, Thierry Mélanie, Soutos-Villars D, Hrcek J. 2021 Community  
566 context modifies response of host-parasitoid interactions to phenological mismatch under warming.  
567 *Authorea* (doi:10.22541/au.162454818.82806593/v1)
- 568 66. Kéfi S *et al.* 2012 More than a meal... integrating non-feeding interactions into food webs. *Ecol.*  
569 *Lett.* **15**, 291–300. (doi:10.1111/j.1461-0248.2011.01732.x)



571 **Table 1.** Odds ratios of a successful parasitism event between parasitoid treatments (single parasitoid, two  
572 parasitoids conspecific, and two parasitoids heterospecific) for each parasitoid species. Results are averaged  
573 over both temperatures because there was no significant interaction between temperature and parasitoid  
574 treatments. Values less than or greater than one denote a decrease or an increase in the odds of successful  
575 parasitism, respectively. Significant differences are highlighted in bold.

| Parasitoid species     | Contrast                     | Odds Ratio   | P-value           |
|------------------------|------------------------------|--------------|-------------------|
| <i>Ganaspis sp.</i>    | 2 conspecifics/single        | <b>0.043</b> | <b>&lt;0.0001</b> |
|                        | 2 heterospecifics/single     | <b>0.166</b> | <b>0.0007</b>     |
|                        | heterospecifics/conspecifics | <b>3.876</b> | <b>&lt;0.0001</b> |
| <i>Asobara sp.</i>     | 2 conspecifics/single        | <b>0.448</b> | <b>0.036</b>      |
|                        | 2 heterospecifics/single     | 0.711        | 0.484             |
|                        | heterospecifics/conspecifics | 1.589        | 0.251             |
| <i>Leptopilina sp.</i> | 2 conspecifics/single        | 0.182        | 0.494             |
|                        | 2 heterospecifics/single     | 0.871        | 0.994             |
|                        | heterospecifics/conspecifics | 4.764        | 0.295             |

576

577 **Figure legends**

578

579 **Figure 1.** Schematic representation of the experimental design. (a) Controls or (b) one single parasitoid  
580 female with either 5, 10, 25, 50 or 100 *D. simulans* per 10 mL of media (N = 424 vials), (c) two parasitoids  
581 conspecific (N = 88 vials) or (d) two parasitoids heterospecific (N = 68 vials) with 50 *D. simulans* per 10  
582 mL of media. (e) Rearing until adults emerge for Experiments 1 and 2 (up to 41 days), or (f) dissection of  
583 10 3<sup>rd</sup> instar larvae or pupae per vial two, three, or four days after infection for Experiment 3.

584

585 **Figure 2.** Differences between observed and estimated degree of infestation (DI) for each parasitoid  
586 assemblage and temperature (i.e.,  $DI_{obs} - DI_0$ ). Negative values translate to risk reduction, while positive  
587 values reflect risk enhancement for the host with multiple parasitoids. Light grey panel: two parasitoids  
588 conspecific, darker grey panel; two parasitoids heterospecific. Parasitoid abbreviations: A: *Asobara sp.*, L:  
589 *Leptopilina sp.*, and G: *Ganaspis sp.* Big dots represent the means ( $\pm$ SE), and small dots represent raw data.

590

591 **Figure 3.** Frequency of super- or multiparasitism events out of the total of parasitized hosts per vial (N =  
592 100 vials) significantly changed depending on parasitoid assemblage and temperature regime, indicating  
593 changes in intrinsic competitive interaction strength among parasitoids. Within each plot, different small  
594 letters denote significant differences between parasitoid assemblages (and temperature regime if  
595 significant). White panel: single parasitoid, light grey panel: two parasitoids conspecific, darker grey panel;  
596 two parasitoids heterospecific. Parasitoid abbreviations: A: *Asobara sp.*, and G: *Ganaspis sp.* Big dots  
597 represent the estimated means ( $\pm$ 95% CIs), and small dots represent raw data.

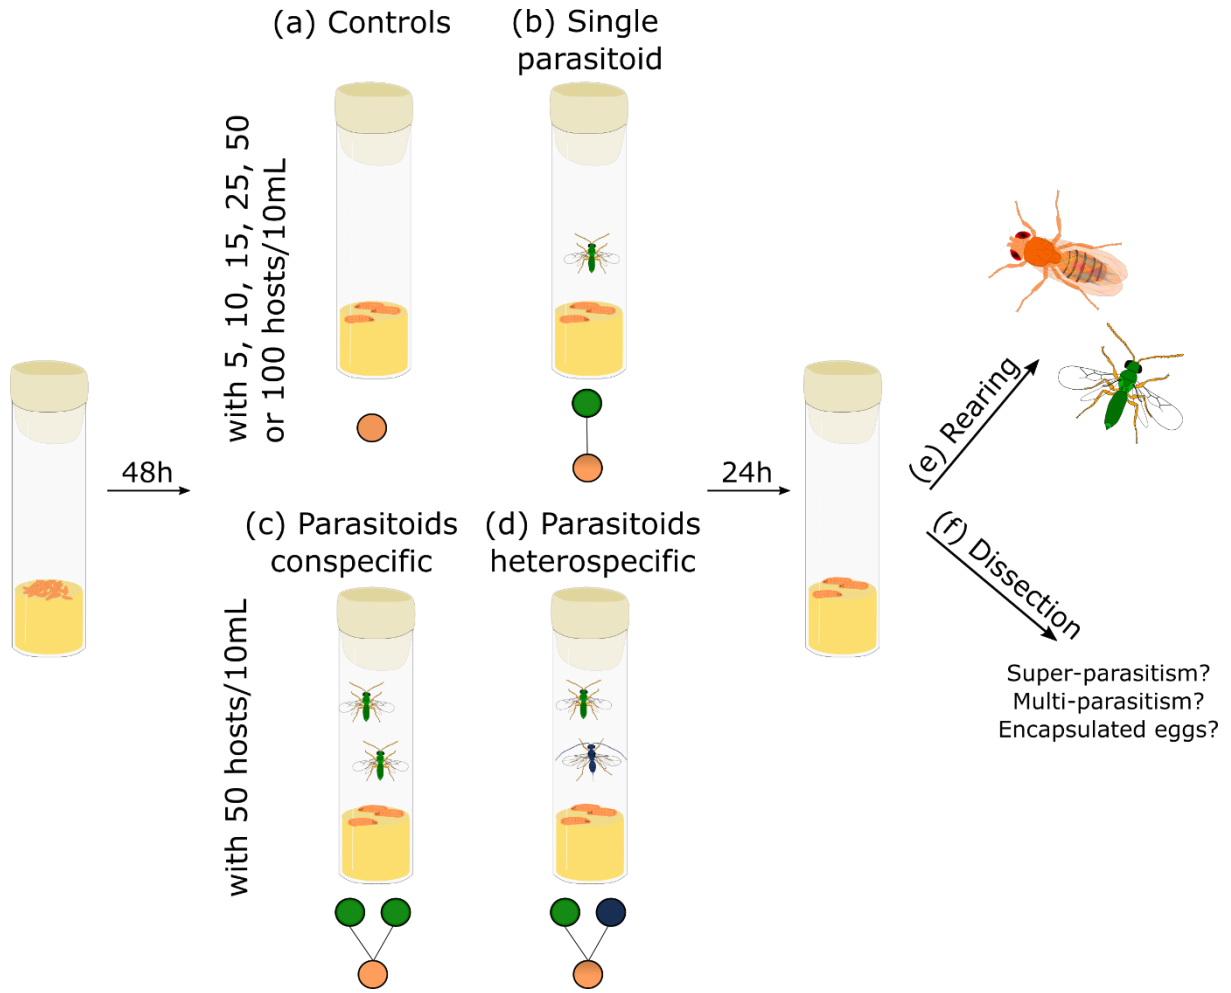

598

599 **Figure 1.**

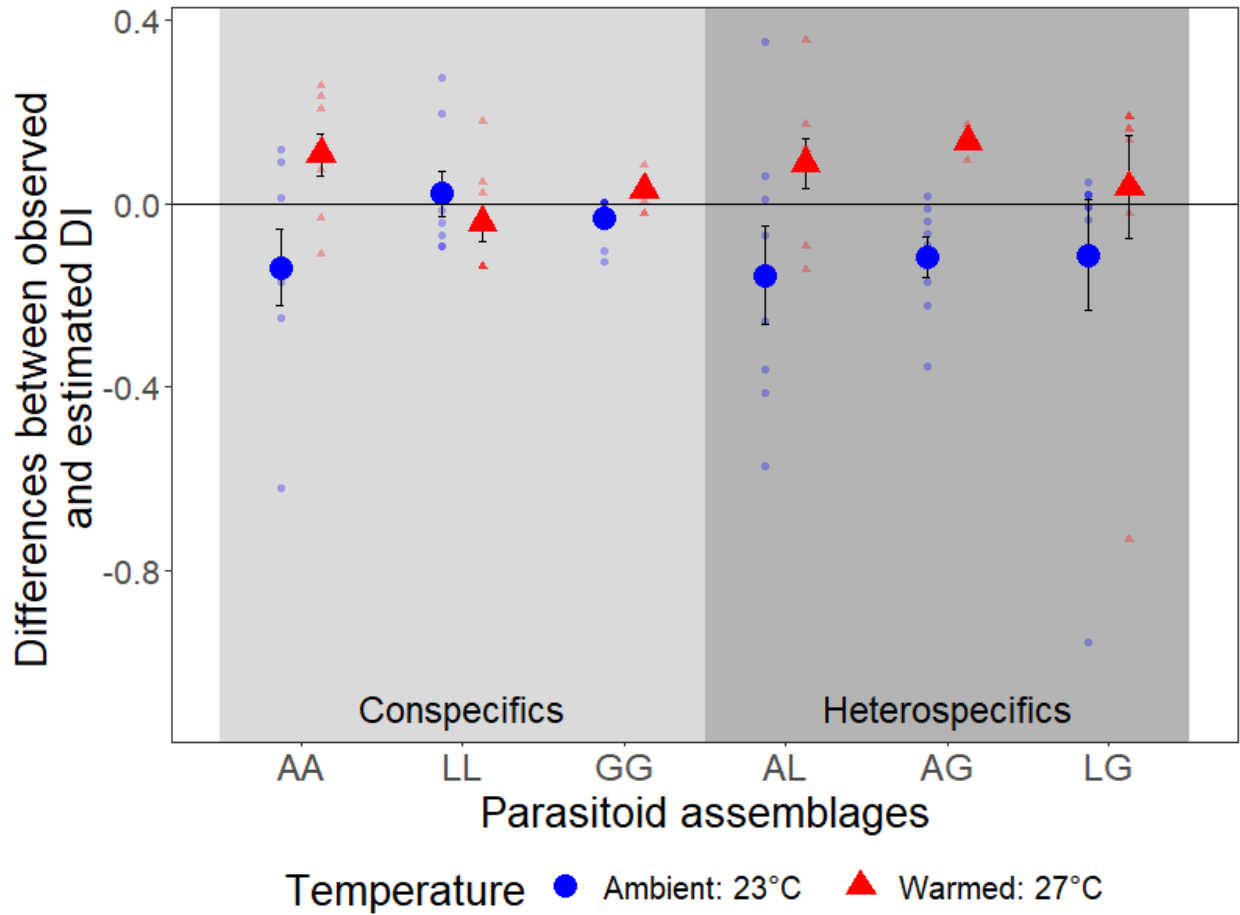

600

601 **Figure 2.**

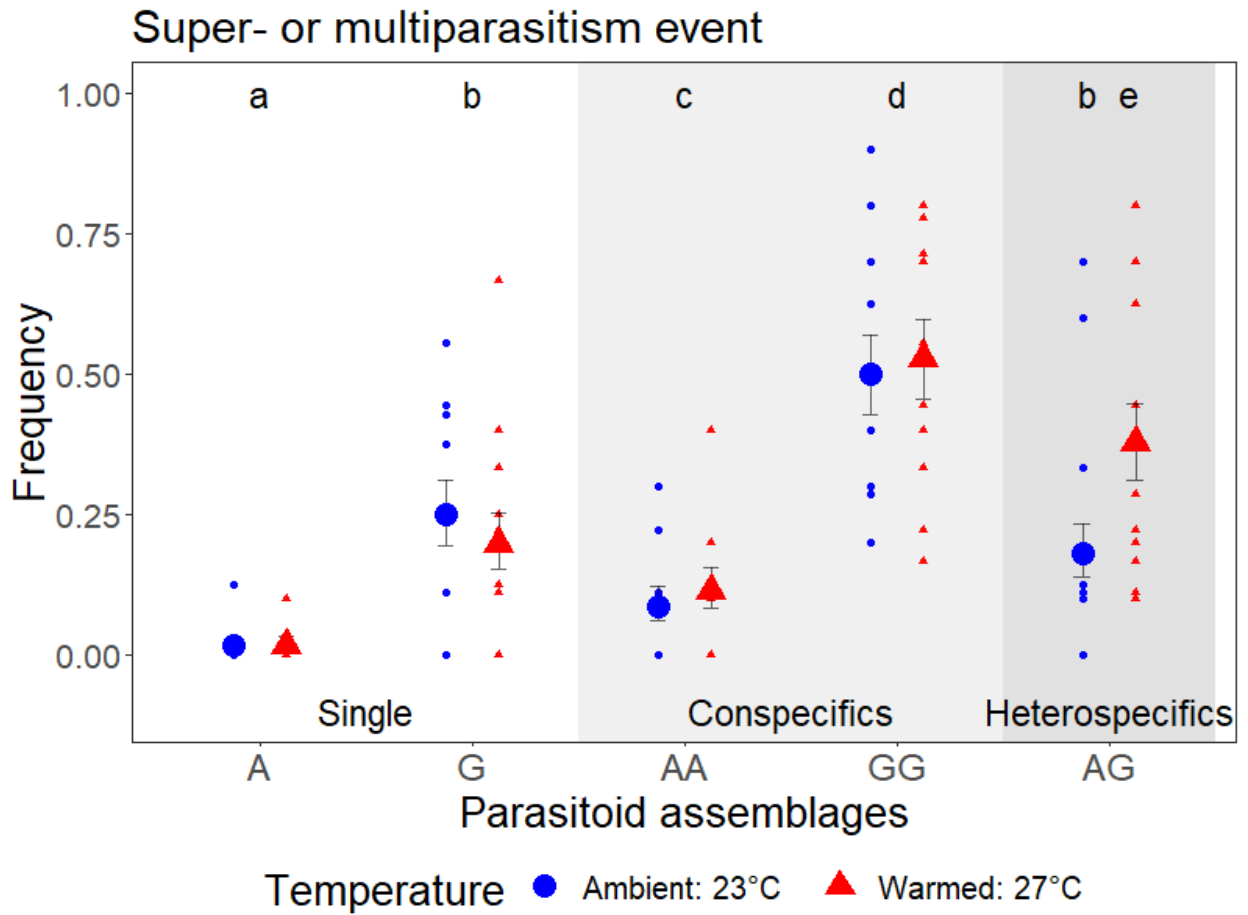

602

603 **Figure 3.**
